# Supplementary material for: MERIDA: a novel Boolean logic-based integer linear program for personalized cancer therapy
Source: Oxford University Press journal article supplement (doi:10.1093/bioinformatics/btab546), 2021-08-03
Supplement: btab546_supplementary_data.zip [file btab546_supplementary_data.zip]

Archive with 3 entries (3 files):
- Supplement_S1.pdf
- Supplement_S2.pdf
- Supplement_S3.pdf
