# Supplementary material for: MERIDA: a novel Boolean logic-based integer linear program for personalized cancer therapy
Source: Oxford University Press journal article supplement (doi:10.1093/bioinformatics/btab546), 2021-08-03
Supplement: btab546_supplementary_data.zip [file btab546_supplementary_data.zip › Supplement_S2.pdf]

# - Supplement S2 - MERIDA: Results

## 1 Runtime analysis

The runtime analysis was conducted to show how the runtime can be reduced using MERIDA in comparison to LOBICO, which ultimately allows us to fit larger models and iteratively apply our method using the results of previous runs of our method. Moreover, we could demonstrate that the usage of a different weight function can additionally decrease the runtime for both methods.

First, we will explain how we obtained the data set used for the runtime experiment. Then, we will discuss how the experiment was conducted and present the results.

### 1.1 Data set generation

We performed the runtime analysis on the Rapamycin drug data set and the mutation data of GDSC Version 6.1. Since LOBICO as well as MERIDA need binarized input and output features, we will in the following explain how these can be generated.

The drug data set contains logarithmized IC50 values for approximately 350 samples. For binarization of the continuous values, we employed the threshold provided by the publication of Iorio *et al.* (Iorio *et al.*, 2016) in which this version of the GDSC data set was introduced. They calculated the threshold with the method described in Knijnenburg *et al.* (Knijnenburg *et al.*, 2016), which is the same method that we use to calculate the thresholds for the newer version of the GDSC data set.

The mutation data is given as single mutations of specific genes. For this analysis, we decided to establish a gene-wide mutation status, i.e. we call a gene mutated (feature value of 1) iff at least one mutation is present and not mutated (feature value of 0) otherwise. This means that we do not distinguish between different mutations or classes of mutations for this analysis.

Since we wanted to investigate which influence the number of input features has on the time needed to fit a model, we used the IntOGen cancer driver list (Gonzalez-Perez *et al.*, 2013) to filter the genes. In particular, we compile 16 data sets with a varying feature set size from 25 to 400 features by a stepsize of 25. We prioritize the genes through the frequency of mutations within a gene as provided by IntOGen.

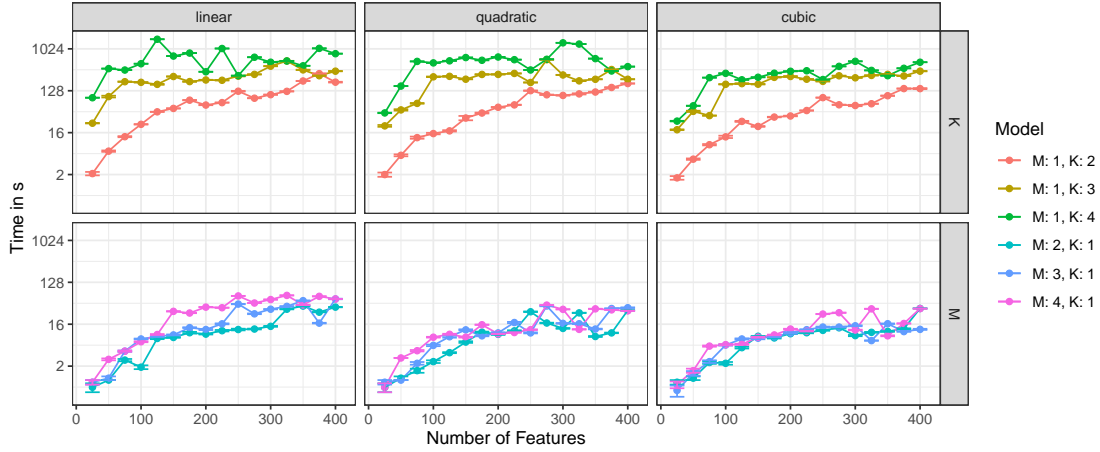

Figure 1: In this figure, we present the runtime of LOBICO with varying hyperparameters  $M$  and  $K$  for the three different weight functions.

## 1.2 Runtime analysis additional results

We tested MERIDA and LOBICO with different hyperparameters (see Table 1), different numbers of input features, and the three different weight functions. Note that for LOBICO we could not fit larger models with both  $K > 1$  and  $M > 1$  in a reasonable amount of time. We performed the computations on a compute server with four Intel(R) Xeon(R) CPU E5-4657L v2 processors with 2.40GHz clock rate. IBM ILOG CPLEX Optimization Studio V12.6.2 for C++ was employed for formulating and solving the ILP. CPLEX was run using 32 cores and a deterministic parallel mode.

We could observe that using MERIDA instead of LOBICO leads to a considerably

Table 1: Parameters

| MERIDA parameters   | LOBICO parameters                                               |
|---------------------|-----------------------------------------------------------------|
| $M \in \{2, 4, 8\}$ | $(K, M) \in \{(1, 1), (2, 1), (1, 2), (2, 2), (1, 4), (4, 1)\}$ |

reduction in runtime (cf. Table 2). Moreover, considering the quadratic or cubic weight function instead of the linear one does also reduce runtime significantly (cf. Table 3). For LOBICO, we note that the two parameters  $K$  and  $M$  seem to influence the runtime differently, i.e. according to our analyses for different  $K$  and  $M$  (see Figure 1), it can be seen that the model parameter  $K$  increases the runtime more strongly than the model parameter  $M$ .

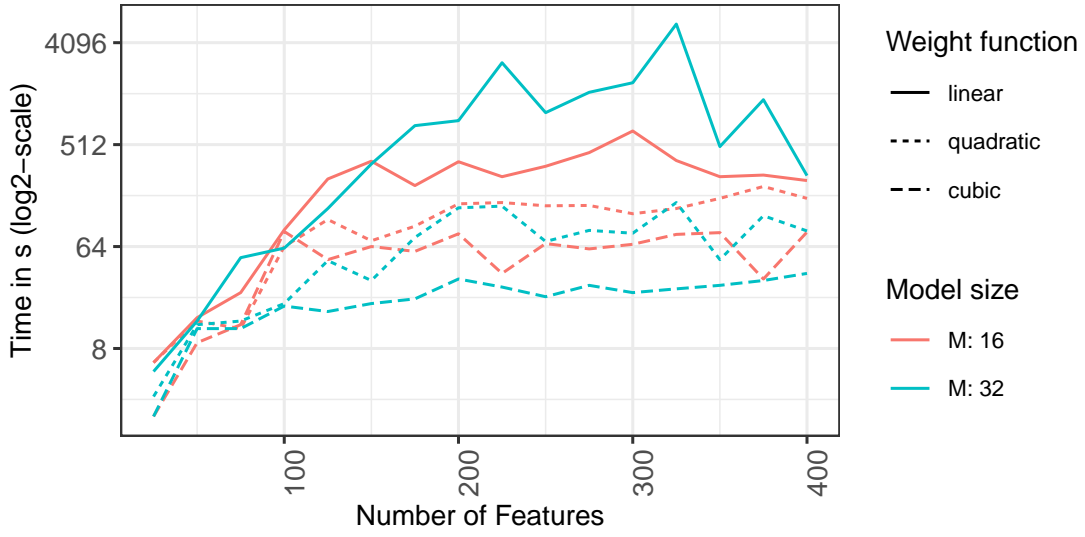

Figure 2: In this figure, we present the runtime of MERIDA for  $M = 16$  and  $M = 32$  for the different weight functions.

Table 2: Runtime comparison of a four-feature model from LOBICO versus a four-feature model from MERIDA. The values depict the factor by which MERIDA is faster than LOBICO using its original linear weight function. To obtain a four-feature model with LOBICO, three different parameter settings can be used  $((K, M) \in \{(1, 4), (4, 1), (2, 2)\})$ .

|                              | MERIDA linear | MERIDA quadratic | MERIDA cubic |
|------------------------------|---------------|------------------|--------------|
| $(K, M) = (1, 4)$            | 3.61          | 4.85             | 6            |
| $(K, M) = (4, 1)$            | 71.79         | 98.54            | 125.31       |
| $(K, M) = (2, 2)$            | 641.97        | 876.74           | 1147.6       |
| Mean of the above three rows | 239.13        | 326.71           | 426.31       |

Table 3: The table gives the runtime advantage of using a quadratic or cubic weight function instead of using a linear weight function. The values depict the factor by which a model with a quadratic or cubic weight function is faster than a model build with the linear weight function. The given factor is calculated by averaging over all tested numbers of features. The number in brackets are the model parameters. For LOBICO, the first number is the value for  $K$  and the second number is the value for  $M$ .

|           | MERIDA (4) | LOBICO (1, 4) | LOBICO (4, 1) | LOBICO (2, 2) |
|-----------|------------|---------------|---------------|---------------|
| quadratic | 1.35       | 2.25          | 1.38          | 2.88          |
| cubic     | 1.65       | 2.49          | 2.55          | 5.38          |

Table 4: This table gives the mean and median runtime of MERIDA across all drugs for the different settings, weight functions, and parameter combinations in the pan-cancer analysis. The mean (median) is calculated by summing up the runtime of the cross-validation and the final fit for one specific drug and then averaging across all drugs.

| Setting   | Weight function | Model size | Mean runtime (in s) | Median runtime (in s) |
|-----------|-----------------|------------|---------------------|-----------------------|
| Setting 1 | cubic           | 1          | 5.3170              | 6                     |
| Setting 1 | cubic           | 2          | 15.7073             | 10                    |
| Setting 1 | cubic           | 3          | 109.6829            | 96                    |
| Setting 1 | cubic           | 4          | 314.45              | 265                   |
| Setting 1 | cubic           | 5          | 1128.3076           | 963                   |
| Setting 1 | cubic           | 6          | 4970.3421           | 3589.5                |
| Setting 1 | quadratic       | 1          | 4.6097              | 6                     |
| Setting 1 | quadratic       | 2          | 17.8780             | 11                    |
| Setting 1 | quadratic       | 3          | 114.9024            | 107                   |
| Setting 1 | quadratic       | 4          | 315.6666            | 241                   |
| Setting 1 | quadratic       | 5          | 1583.2631           | 1051                  |
| Setting 1 | quadratic       | 6          | 7657.0277           | 4104                  |
| Setting 1 | linear          | 1          | 4.1463              | 5                     |
| Setting 1 | linear          | 2          | 26.2195             | 15                    |
| Setting 1 | linear          | 3          | 128.4390            | 120                   |
| Setting 1 | linear          | 4          | 409                 | 215                   |
| Setting 1 | linear          | 5          | 2219.1842           | 1434.5                |
| Setting 1 | linear          | 6          | 9679.0285           | 7176                  |
| Setting 2 | cubic           | 1          | 0                   | 0                     |
| Setting 2 | cubic           | 2          | 3.9090              | 5                     |
| Setting 2 | cubic           | 3          | 9.9090              | 9                     |
| Setting 2 | cubic           | 4          | 68.6363             | 62                    |
| Setting 2 | cubic           | 5          | 137.3636            | 147                   |
| Setting 2 | cubic           | 6          | 428.5454            | 322                   |
| Setting 2 | quadratic       | 1          | 0                   | 0                     |
| Setting 2 | quadratic       | 2          | 2.3636              | 1                     |
| Setting 2 | quadratic       | 3          | 11.3636             | 10                    |
| Setting 2 | quadratic       | 4          | 79.3636             | 77                    |
| Setting 2 | quadratic       | 5          | 167.7272            | 174                   |
| Setting 2 | quadratic       | 6          | 695.3636            | 438                   |
| Setting 2 | linear          | 1          | 0                   | 0                     |
| Setting 2 | linear          | 2          | 2.3636              | 1                     |
| Setting 2 | linear          | 3          | 24.6363             | 16                    |
| Setting 2 | linear          | 4          | 102.3636            | 93                    |
| Setting 2 | linear          | 5          | 376.1818            | 220                   |
| Setting 2 | linear          | 6          | 1854.9090           | 1168                  |
| Setting 3 | cubic           | 1          | 3.8181              | 3                     |

|           |           |   |           |      |
|-----------|-----------|---|-----------|------|
| Setting 3 | cubic     | 2 | 12.9090   | 12   |
| Setting 3 | cubic     | 3 | 105.3636  | 109  |
| Setting 3 | cubic     | 4 | 265.1818  | 230  |
| Setting 3 | cubic     | 5 | 1100.8181 | 701  |
| Setting 3 | cubic     | 6 | 4942.1818 | 2544 |
| Setting 3 | quadratic | 1 | 4.8181    | 6    |
| Setting 3 | quadratic | 2 | 15.9090   | 12   |
| Setting 3 | quadratic | 3 | 107       | 124  |
| Setting 3 | quadratic | 4 | 273.5454  | 221  |
| Setting 3 | quadratic | 5 | 1600.6363 | 1381 |
| Setting 3 | quadratic | 6 | 9044.1818 | 6007 |
| Setting 3 | linear    | 1 | 3.7272    | 4    |
| Setting 3 | linear    | 2 | 28.7272   | 16   |
| Setting 3 | linear    | 3 | 114       | 99   |
| Setting 3 | linear    | 4 | 452       | 179  |
| Setting 3 | linear    | 5 | 2950.4545 | 1332 |
| Setting 3 | linear    | 6 | 8749      | 7584 |

Table 5: This table gives the mean and median runtime of MERIDA across all drugs for the different settings, weight functions, and parameter combinations in the non-haematological cancer cell line analysis. The mean is calculated by summing up the runtime of the cross-validation and the final fit for one specific drug and then averaging across all drugs.

| Setting   | Weight function | Model size | Mean runtime (in s) | Median runtime (in s) |
|-----------|-----------------|------------|---------------------|-----------------------|
| Setting 1 | cubic           | 1          | 1.2926              | 1                     |
| Setting 1 | cubic           | 2          | 12.9024             | 10                    |
| Setting 1 | cubic           | 3          | 88.7317             | 62                    |
| Setting 1 | cubic           | 4          | 233.9268            | 172                   |
| Setting 1 | cubic           | 5          | 774.1707            | 476                   |
| Setting 1 | cubic           | 6          | 2433.5609           | 1759                  |
| Setting 1 | quadratic       | 1          | 1.5853              | 1                     |
| Setting 1 | quadratic       | 2          | 14.4146             | 10                    |
| Setting 1 | quadratic       | 3          | 70.1463             | 62                    |
| Setting 1 | quadratic       | 4          | 188.7560            | 151                   |
| Setting 1 | quadratic       | 5          | 622.6097            | 445                   |
| Setting 1 | quadratic       | 6          | 2753.7560           | 1930                  |
| Setting 1 | linear          | 1          | 2.0487              | 1                     |
| Setting 1 | linear          | 2          | 23.9024             | 12                    |
| Setting 1 | linear          | 3          | 67.4634             | 62                    |
| Setting 1 | linear          | 4          | 177.4146            | 127                   |
| Setting 1 | linear          | 5          | 700.3170            | 480                   |
| Setting 1 | linear          | 6          | 5473.6829           | 2277                  |

|           |           |   |           |      |
|-----------|-----------|---|-----------|------|
| Setting 2 | cubic     | 1 | 0         | 0    |
| Setting 2 | cubic     | 2 | 1.4545    | 1    |
| Setting 2 | cubic     | 3 | 7.0909    | 7    |
| Setting 2 | cubic     | 4 | 40.8181   | 32   |
| Setting 2 | cubic     | 5 | 90.1818   | 79   |
| Setting 2 | cubic     | 6 | 195       | 145  |
| Setting 2 | quadratic | 1 | 0         | 0    |
| Setting 2 | quadratic | 2 | 0.54545   | 0    |
| Setting 2 | quadratic | 3 | 11.0909   | 9    |
| Setting 2 | quadratic | 4 | 54.5454   | 59   |
| Setting 2 | quadratic | 5 | 110.1818  | 100  |
| Setting 2 | quadratic | 6 | 261.1818  | 133  |
| Setting 2 | linear    | 1 | 0         | 0    |
| Setting 2 | linear    | 2 | 0.7272    | 0    |
| Setting 2 | linear    | 3 | 19.4545   | 10   |
| Setting 2 | linear    | 4 | 61.1818   | 54   |
| Setting 2 | linear    | 5 | 150.3636  | 101  |
| Setting 2 | linear    | 6 | 742.8181  | 232  |
| Setting 3 | cubic     | 1 | 0.7272    | 0    |
| Setting 3 | cubic     | 2 | 10.9090   | 9    |
| Setting 3 | cubic     | 3 | 66.2727   | 68   |
| Setting 3 | cubic     | 4 | 179.7272  | 192  |
| Setting 3 | cubic     | 5 | 498.9090  | 435  |
| Setting 3 | cubic     | 6 | 1724.1818 | 1539 |
| Setting 3 | quadratic | 1 | 1.0909    | 0    |
| Setting 3 | quadratic | 2 | 13.2727   | 8    |
| Setting 3 | quadratic | 3 | 65.9090   | 63   |
| Setting 3 | quadratic | 4 | 166.5454  | 168  |
| Setting 3 | quadratic | 5 | 581.3636  | 458  |
| Setting 3 | quadratic | 6 | 2644.7272 | 2203 |
| Setting 3 | linear    | 1 | 1         | 0    |
| Setting 3 | linear    | 2 | 23.9090   | 12   |
| Setting 3 | linear    | 3 | 67        | 55   |
| Setting 3 | linear    | 4 | 225.4545  | 130  |
| Setting 3 | linear    | 5 | 900.3636  | 553  |
| Setting 3 | linear    | 6 | 9887.0909 | 2176 |

Table 6: This table gives the mean and median runtime of MERIDA across all drugs for the different settings, weight functions, and parameter combinations in the haematological cancer cell line analysis. The mean is calculated by summing up the runtime of the cross-validation and the final fit for one specific drug and then averaging across all drugs.

| Setting   | Weight function | Model size | Mean runtime (in s) | Median runtime (in s) |
|-----------|-----------------|------------|---------------------|-----------------------|
| Setting 1 | cubic           | 1          | 0                   | 0                     |
| Setting 1 | cubic           | 2          | 0.0243              | 0                     |
| Setting 1 | cubic           | 3          | 2.1707              | 1                     |
| Setting 1 | cubic           | 4          | 10.5853             | 11                    |
| Setting 1 | cubic           | 5          | 20.4878             | 23                    |
| Setting 1 | cubic           | 6          | 29.3170             | 31                    |
| Setting 1 | quadratic       | 1          | 0                   | 0                     |
| Setting 1 | quadratic       | 2          | 0.0487              | 0                     |
| Setting 1 | quadratic       | 3          | 2.9756              | 2                     |
| Setting 1 | quadratic       | 4          | 11.7804             | 12                    |
| Setting 1 | quadratic       | 5          | 20.4878             | 22                    |
| Setting 1 | quadratic       | 6          | 27.3414             | 27                    |
| Setting 1 | linear          | 1          | 0                   | 0                     |
| Setting 1 | linear          | 2          | 0.2195              | 0                     |
| Setting 1 | linear          | 3          | 4.7073              | 4                     |
| Setting 1 | linear          | 4          | 14.3414             | 16                    |
| Setting 1 | linear          | 5          | 19.9756             | 21                    |
| Setting 1 | linear          | 6          | 26.5365             | 27                    |
| Setting 2 | cubic           | 1          | 0                   | 0                     |
| Setting 2 | cubic           | 2          | 0                   | 0                     |
| Setting 2 | cubic           | 3          | 0                   | 0                     |
| Setting 2 | cubic           | 4          | 1.3636              | 1                     |
| Setting 2 | cubic           | 5          | 8.4545              | 10                    |
| Setting 2 | cubic           | 6          | 18                  | 21                    |
| Setting 2 | quadratic       | 1          | 0                   | 0                     |
| Setting 2 | quadratic       | 2          | 0                   | 0                     |
| Setting 2 | quadratic       | 3          | 0                   | 0                     |
| Setting 2 | quadratic       | 4          | 1.5454              | 1                     |
| Setting 2 | quadratic       | 5          | 10                  | 11                    |
| Setting 2 | quadratic       | 6          | 16.0909             | 20                    |
| Setting 2 | linear          | 1          | 0                   | 0                     |
| Setting 2 | linear          | 2          | 0                   | 0                     |
| Setting 2 | linear          | 3          | 0.0909              | 0                     |
| Setting 2 | linear          | 4          | 2.2727              | 2                     |
| Setting 2 | linear          | 5          | 9.4545              | 9                     |
| Setting 2 | linear          | 6          | 18.6363             | 22                    |
| Setting 3 | cubic           | 1          | 0                   | 0                     |
| Setting 3 | cubic           | 2          | 0.0909              | 0                     |
| Setting 3 | cubic           | 3          | 1.3636              | 1                     |
| Setting 3 | cubic           | 4          | 9.3636              | 12                    |
| Setting 3 | cubic           | 5          | 19.8181             | 21                    |
| Setting 3 | cubic           | 6          | 30.4545             | 35                    |

|           |           |   |         |    |
|-----------|-----------|---|---------|----|
| Setting 3 | quadratic | 1 | 0       | 0  |
| Setting 3 | quadratic | 2 | 0       | 0  |
| Setting 3 | quadratic | 3 | 1.9090  | 1  |
| Setting 3 | quadratic | 4 | 11.6363 | 13 |
| Setting 3 | quadratic | 5 | 16.8181 | 18 |
| Setting 3 | quadratic | 6 | 25.2727 | 28 |
| Setting 3 | linear    | 1 | 0       | 0  |
| Setting 3 | linear    | 2 | 0       | 0  |
| Setting 3 | linear    | 3 | 2.9090  | 2  |
| Setting 3 | linear    | 4 | 11.2727 | 13 |
| Setting 3 | linear    | 5 | 18.0909 | 19 |
| Setting 3 | linear    | 6 | 24.3636 | 25 |

Table 7: This table provides the runtime (CV + final fit) of LOBICO for each of the 10 analyzed drugs. In total, LOBICO needed approximately 4.5 days (total runtime) for fitting the shown models. For the calculation of the total runtime, we excluded all models where either a single fit in the cross-validation or the final fitting procedure was higher than 6 hours. Note that these models were also not completely fit. Additionally, we did not fit models for specific parameter combinations for the quadratic and linear weight function if the runtime for the cubic weight function already exceeded this threshold. Similarly, we did not fit a model for the linear weight function if the quadratic weight function exceeded this threshold.

| Drug       | Setting   | Weight function | Model size | Runtime (in s) |
|------------|-----------|-----------------|------------|----------------|
| AZD8055    | Setting 1 | cubic           | 1, 1       | 27             |
| AZD8055    | Setting 1 | cubic           | 1, 2       | 1036           |
| AZD8055    | Setting 1 | cubic           | 2, 1       | 137            |
| AZD8055    | Setting 1 | cubic           | 2, 2       | 42971          |
| AZD8055    | Setting 1 | quadratic       | 1, 1       | 29             |
| AZD8055    | Setting 1 | quadratic       | 1, 2       | 3251           |
| AZD8055    | Setting 1 | quadratic       | 2, 1       | 143            |
| AZD8055    | Setting 1 | quadratic       | 2,2        | > 21 600       |
| AZD8055    | Setting 1 | linear          | 1, 1       | 28             |
| AZD8055    | Setting 1 | linear          | 1, 2       | 1916           |
| AZD8055    | Setting 1 | linear          | 2, 1       | 136            |
| AZD8055    | Setting 1 | linear          | 2,2        | -              |
| Omipalisib | Setting 1 | cubic           | 1, 1       | 27             |
| Omipalisib | Setting 1 | cubic           | 1, 2       | 1412           |
| Omipalisib | Setting 1 | cubic           | 2, 1       | 135            |
| Omipalisib | Setting 1 | cubic           | 2, 2       | > 21 600       |
| Omipalisib | Setting 1 | quadratic       | 1, 1       | 28             |
| Omipalisib | Setting 1 | quadratic       | 1, 2       | 2507           |

|              |           |           |      |          |
|--------------|-----------|-----------|------|----------|
| Omipalisib   | Setting 1 | quadratic | 2, 1 | 137      |
| Omipalisib   | Setting 1 | quadratic | 2,2  | -        |
| Omipalisib   | Setting 1 | linear    | 1, 1 | 31       |
| Omipalisib   | Setting 1 | linear    | 1, 2 | 7317     |
| Omipalisib   | Setting 1 | linear    | 2, 1 | 9530     |
| Omipalisib   | Setting 1 | linear    | 2, 2 | -        |
| Voxtalisib   | Setting 1 | cubic     | 1, 1 | 28       |
| Voxtalisib   | Setting 1 | cubic     | 1, 2 | 421      |
| Voxtalisib   | Setting 1 | cubic     | 2, 1 | 145      |
| Voxtalisib   | Setting 1 | cubic     | 2, 2 | 35849    |
| Voxtalisib   | Setting 1 | quadratic | 1, 1 | 26       |
| Voxtalisib   | Setting 1 | quadratic | 1, 2 | 1887     |
| Voxtalisib   | Setting 1 | quadratic | 2, 1 | 920      |
| Voxtalisib   | Setting 1 | quadratic | 2,2  | > 21 600 |
| Voxtalisib   | Setting 1 | linear    | 1, 1 | 29       |
| Voxtalisib   | Setting 1 | linear    | 1, 2 | 2916     |
| Voxtalisib   | Setting 1 | linear    | 2, 1 | 10353    |
| Voxtalisib   | Setting 1 | linear    | 2, 2 | -        |
| NSC319726    | Setting 1 | cubic     | 1, 1 | 36       |
| NSC319726    | Setting 1 | cubic     | 1, 2 | 8696     |
| NSC319726    | Setting 1 | cubic     | 2, 1 | 3121     |
| NSC319726    | Setting 1 | cubic     | 2, 2 | > 21 600 |
| NSC319726    | Setting 1 | quadratic | 1, 1 | 26       |
| NSC319726    | Setting 1 | quadratic | 1, 2 | 6859     |
| NSC319726    | Setting 1 | quadratic | 2, 1 | 8616     |
| NSC319726    | Setting 1 | quadratic | 2, 2 | -        |
| NSC319726    | Setting 1 | linear    | 1, 1 | 25       |
| NSC319726    | Setting 1 | linear    | 1, 2 | 49149    |
| NSC319726    | Setting 1 | linear    | 2, 1 | 16323    |
| NSC319726    | Setting 1 | linear    | 2,2  | -        |
| Niraparib    | Setting 1 | cubic     | 1, 1 | 24       |
| Niraparib    | Setting 1 | cubic     | 1, 2 | 708      |
| Niraparib    | Setting 1 | cubic     | 2, 1 | 103      |
| Niraparib    | Setting 1 | cubic     | 2, 2 | > 21 600 |
| Niraparib    | Setting 1 | quadratic | 1, 1 | 26       |
| Niraparib    | Setting 1 | quadratic | 1, 2 | 1428     |
| Niraparib    | Setting 1 | quadratic | 2, 1 | 102      |
| Niraparib    | Setting 1 | quadratic | 2,2  | -        |
| Niraparib    | Setting 1 | linear    | 1, 1 | 23       |
| Niraparib    | Setting 1 | linear    | 1, 2 | 2499     |
| Niraparib    | Setting 1 | linear    | 2, 1 | 168      |
| Niraparib    | Setting 1 | linear    | 2, 2 | -        |
| Temsirolimus | Setting 3 | cubic     | 1, 1 | 34       |
| Temsirolimus | Setting 3 | cubic     | 1, 2 | 2545     |

|              |           |           |      |          |
|--------------|-----------|-----------|------|----------|
| Temsirolimus | Setting 3 | cubic     | 2, 1 | 176      |
| Temsirolimus | Setting 3 | cubic     | 2, 2 | > 21 600 |
| Temsirolimus | Setting 3 | quadratic | 1, 1 | 26       |
| Temsirolimus | Setting 3 | quadratic | 1, 2 | 3338     |
| Temsirolimus | Setting 3 | quadratic | 2, 1 | 2901     |
| Temsirolimus | Setting 3 | quadratic | 2, 2 | -        |
| Temsirolimus | Setting 3 | linear    | 1, 1 | 27       |
| Temsirolimus | Setting 3 | linear    | 1, 2 | 5280     |
| Temsirolimus | Setting 3 | linear    | 2, 1 | 15451    |
| Temsirolimus | Setting 3 | linear    | 2, 2 | -        |
| CX-5461      | Setting 3 | cubic     | 1, 1 | 26       |
| CX-5461      | Setting 3 | cubic     | 1, 2 | 2212     |
| CX-5461      | Setting 3 | cubic     | 2, 1 | 515      |
| CX-5461      | Setting 3 | cubic     | 2, 2 | > 21 600 |
| CX-5461      | Setting 3 | quadratic | 1, 1 | 31       |
| CX-5461      | Setting 3 | quadratic | 1, 2 | 7170     |
| CX-5461      | Setting 3 | quadratic | 2, 1 | 5794     |
| CX-5461      | Setting 3 | quadratic | 2, 2 | -        |
| CX-5461      | Setting 3 | linear    | 1, 1 | 28       |
| CX-5461      | Setting 3 | linear    | 1, 2 | 31725    |
| CX-5461      | Setting 3 | linear    | 2, 1 | 21984    |
| CX-5461      | Setting 3 | linear    | 2, 2 | -        |
| Rapamycin    | Setting 3 | cubic     | 1, 1 | 25       |
| Rapamycin    | Setting 3 | cubic     | 1, 2 | 44       |
| Rapamycin    | Setting 3 | cubic     | 2, 1 | 115      |
| Rapamycin    | Setting 3 | cubic     | 2, 2 | 9440     |
| Rapamycin    | Setting 3 | quadratic | 1, 1 | 23       |
| Rapamycin    | Setting 3 | quadratic | 1, 2 | 337      |
| Rapamycin    | Setting 3 | quadratic | 2, 1 | 111      |
| Rapamycin    | Setting 3 | quadratic | 2, 2 | 20823    |
| Rapamycin    | Setting 3 | linear    | 1, 1 | 30       |
| Rapamycin    | Setting 3 | linear    | 1, 2 | 1927     |
| Rapamycin    | Setting 3 | linear    | 2, 1 | 110      |
| Rapamycin    | Setting 3 | linear    | 2, 2 | > 21 600 |
| Dactolisib   | Setting 3 | cubic     | 1, 1 | 24       |
| Dactolisib   | Setting 3 | cubic     | 1, 2 | 217      |
| Dactolisib   | Setting 3 | cubic     | 2, 1 | 107      |
| Dactolisib   | Setting 3 | cubic     | 2, 2 | 11968    |
| Dactolisib   | Setting 3 | quadratic | 1, 1 | 25       |
| Dactolisib   | Setting 3 | quadratic | 1, 2 | 1181     |
| Dactolisib   | Setting 3 | quadratic | 2, 1 | 110      |
| Dactolisib   | Setting 3 | quadratic | 2, 2 | 15602    |
| Dactolisib   | Setting 3 | linear    | 1, 1 | 24       |
| Dactolisib   | Setting 3 | linear    | 1, 2 | 1900     |

|             |           |           |      |          |
|-------------|-----------|-----------|------|----------|
| Dactolisib  | Setting 3 | linear    | 2, 1 | 119      |
| Dactolisib  | Setting 3 | linear    | 2, 2 | > 21 600 |
| Talazoparib | Setting 3 | cubic     | 1, 1 | 24       |
| Talazoparib | Setting 3 | cubic     | 1, 2 | 1078     |
| Talazoparib | Setting 3 | cubic     | 2, 1 | 131      |
| Talazoparib | Setting 3 | cubic     | 2,2  | > 21 600 |
| Talazoparib | Setting 3 | quadratic | 1, 1 | 23       |
| Talazoparib | Setting 3 | quadratic | 1, 2 | 956      |
| Talazoparib | Setting 3 | quadratic | 2, 1 | 125      |
| Talazoparib | Setting 3 | quadratic | 2,2  | -        |
| Talazoparib | Setting 3 | linear    | 1, 1 | 23       |
| Talazoparib | Setting 3 | linear    | 1, 2 | 1284     |
| Talazoparib | Setting 3 | linear    | 2, 1 | 5258     |
| Talazoparib | Setting 3 | linear    | 2, 2 | -        |

Table 8: This table provides the runtime (CV + final fit) of MERIDA for each of the 10 drugs analyzed in the comparison between LOBICO and MERIDA. In total, MERIDA needed approximately 3 days for fitting the shown models. No models were excluded for the calculation of the total runtime.

| Drug       | Setting   | Weight function | Model size | Runtime (in s) |
|------------|-----------|-----------------|------------|----------------|
| AZD8055    | Setting 1 | cubic           | 1          | 7              |
| AZD8055    | Setting 1 | cubic           | 2          | 10             |
| AZD8055    | Setting 1 | cubic           | 3          | 137            |
| AZD8055    | Setting 1 | cubic           | 4          | 327            |
| AZD8055    | Setting 1 | cubic           | 5          | 1234           |
| AZD8055    | Setting 1 | cubic           | 6          | 4742           |
| AZD8055    | Setting 1 | quadratic       | 1          | 6              |
| AZD8055    | Setting 1 | quadratic       | 2          | 9              |
| AZD8055    | Setting 1 | quadratic       | 3          | 115            |
| AZD8055    | Setting 1 | quadratic       | 4          | 256            |
| AZD8055    | Setting 1 | quadratic       | 5          | 1043           |
| AZD8055    | Setting 1 | quadratic       | 6          | 4188           |
| AZD8055    | Setting 1 | linear          | 1          | 6              |
| AZD8055    | Setting 1 | linear          | 2          | 22             |
| AZD8055    | Setting 1 | linear          | 3          | 143            |
| AZD8055    | Setting 1 | linear          | 4          | 260            |
| AZD8055    | Setting 1 | linear          | 5          | 1581           |
| AZD8055    | Setting 1 | linear          | 6          | 8986           |
| Omipalisib | Setting 1 | cubic           | 1          | 6              |
| Omipalisib | Setting 1 | cubic           | 2          | 14             |
| Omipalisib | Setting 1 | cubic           | 3          | 53             |
| Omipalisib | Setting 1 | cubic           | 4          | 203            |

|            |           |           |   |       |
|------------|-----------|-----------|---|-------|
| Omipalisib | Setting 1 | cubic     | 5 | 317   |
| Omipalisib | Setting 1 | cubic     | 6 | 1228  |
| Omipalisib | Setting 1 | quadratic | 1 | 5     |
| Omipalisib | Setting 1 | quadratic | 2 | 19    |
| Omipalisib | Setting 1 | quadratic | 3 | 133   |
| Omipalisib | Setting 1 | quadratic | 4 | 212   |
| Omipalisib | Setting 1 | quadratic | 5 | 728   |
| Omipalisib | Setting 1 | quadratic | 6 | 2838  |
| Omipalisib | Setting 1 | linear    | 1 | 4     |
| Omipalisib | Setting 1 | linear    | 2 | 57    |
| Omipalisib | Setting 1 | linear    | 3 | 217   |
| Omipalisib | Setting 1 | linear    | 4 | 1221  |
| Omipalisib | Setting 1 | linear    | 5 | 7524  |
| Omipalisib | Setting 1 | linear    | 6 | 39933 |
| Voxtalib   | Setting 1 | cubic     | 1 | 6     |
| Voxtalib   | Setting 1 | cubic     | 2 | 8     |
| Voxtalib   | Setting 1 | cubic     | 3 | 99    |
| Voxtalib   | Setting 1 | cubic     | 4 | 219   |
| Voxtalib   | Setting 1 | cubic     | 5 | 1160  |
| Voxtalib   | Setting 1 | cubic     | 6 | 6790  |
| Voxtalib   | Setting 1 | quadratic | 1 | 6     |
| Voxtalib   | Setting 1 | quadratic | 2 | 22    |
| Voxtalib   | Setting 1 | quadratic | 3 | 117   |
| Voxtalib   | Setting 1 | quadratic | 4 | 241   |
| Voxtalib   | Setting 1 | quadratic | 5 | 818   |
| Voxtalib   | Setting 1 | quadratic | 6 | 5589  |
| Voxtalib   | Setting 1 | linear    | 1 | 7     |
| Voxtalib   | Setting 1 | linear    | 2 | 41    |
| Voxtalib   | Setting 1 | linear    | 3 | 119   |
| Voxtalib   | Setting 1 | linear    | 4 | 165   |
| Voxtalib   | Setting 1 | linear    | 5 | 610   |
| Voxtalib   | Setting 1 | linear    | 6 | 4254  |
| NSC319726  | Setting 1 | cubic     | 1 | 3     |
| NSC319726  | Setting 1 | cubic     | 2 | 6     |
| NSC319726  | Setting 1 | cubic     | 3 | 32    |
| NSC319726  | Setting 1 | cubic     | 4 | 93    |
| NSC319726  | Setting 1 | cubic     | 5 | 153   |
| NSC319726  | Setting 1 | cubic     | 6 | 470   |
| NSC319726  | Setting 1 | quadratic | 1 | 4     |
| NSC319726  | Setting 1 | quadratic | 2 | 12    |
| NSC319726  | Setting 1 | quadratic | 3 | 93    |
| NSC319726  | Setting 1 | quadratic | 4 | 135   |
| NSC319726  | Setting 1 | quadratic | 5 | 467   |
| NSC319726  | Setting 1 | quadratic | 6 | 1734  |

|              |           |           |   |       |
|--------------|-----------|-----------|---|-------|
| NSC319726    | Setting 1 | linear    | 1 | 1     |
| NSC319726    | Setting 1 | linear    | 2 | 30    |
| NSC319726    | Setting 1 | linear    | 3 | 125   |
| NSC319726    | Setting 1 | linear    | 4 | 235   |
| NSC319726    | Setting 1 | linear    | 5 | 1436  |
| NSC319726    | Setting 1 | linear    | 6 | 8995  |
| Niraparib    | Setting 1 | cubic     | 1 | 1     |
| Niraparib    | Setting 1 | cubic     | 2 | 3     |
| Niraparib    | Setting 1 | cubic     | 3 | 15    |
| Niraparib    | Setting 1 | cubic     | 4 | 65    |
| Niraparib    | Setting 1 | cubic     | 5 | 134   |
| Niraparib    | Setting 1 | cubic     | 6 | 317   |
| Niraparib    | Setting 1 | quadratic | 1 | 0     |
| Niraparib    | Setting 1 | quadratic | 2 | 5     |
| Niraparib    | Setting 1 | quadratic | 3 | 28    |
| Niraparib    | Setting 1 | quadratic | 4 | 79    |
| Niraparib    | Setting 1 | quadratic | 5 | 142   |
| Niraparib    | Setting 1 | quadratic | 6 | 372   |
| Niraparib    | Setting 1 | linear    | 1 | 1     |
| Niraparib    | Setting 1 | linear    | 2 | 7     |
| Niraparib    | Setting 1 | linear    | 3 | 52    |
| Niraparib    | Setting 1 | linear    | 4 | 117   |
| Niraparib    | Setting 1 | linear    | 5 | 201   |
| Niraparib    | Setting 1 | linear    | 6 | 1100  |
| Temsirolimus | Setting 3 | cubic     | 1 | 7     |
| Temsirolimus | Setting 3 | cubic     | 2 | 16    |
| Temsirolimus | Setting 3 | cubic     | 3 | 122   |
| Temsirolimus | Setting 3 | cubic     | 4 | 315   |
| Temsirolimus | Setting 3 | cubic     | 5 | 1955  |
| Temsirolimus | Setting 3 | cubic     | 6 | 13281 |
| Temsirolimus | Setting 3 | quadratic | 1 | 6     |
| Temsirolimus | Setting 3 | quadratic | 2 | 40    |
| Temsirolimus | Setting 3 | quadratic | 3 | 184   |
| Temsirolimus | Setting 3 | quadratic | 4 | 330   |
| Temsirolimus | Setting 3 | quadratic | 5 | 3298  |
| Temsirolimus | Setting 3 | quadratic | 6 | 19885 |
| Temsirolimus | Setting 3 | linear    | 1 | 4     |
| Temsirolimus | Setting 3 | linear    | 2 | 89    |
| Temsirolimus | Setting 3 | linear    | 3 | 185   |
| Temsirolimus | Setting 3 | linear    | 4 | 889   |
| Temsirolimus | Setting 3 | linear    | 5 | 4035  |
| Temsirolimus | Setting 3 | linear    | 6 | 31163 |
| CX-5461      | Setting 3 | cubic     | 1 | 5     |
| CX-5461      | Setting 3 | cubic     | 2 | 7     |

|            |           |           |   |       |
|------------|-----------|-----------|---|-------|
| CX-5461    | Setting 3 | cubic     | 3 | 109   |
| CX-5461    | Setting 3 | cubic     | 4 | 198   |
| CX-5461    | Setting 3 | cubic     | 5 | 701   |
| CX-5461    | Setting 3 | cubic     | 6 | 2544  |
| CX-5461    | Setting 3 | quadratic | 1 | 6     |
| CX-5461    | Setting 3 | quadratic | 2 | 18    |
| CX-5461    | Setting 3 | quadratic | 3 | 168   |
| CX-5461    | Setting 3 | quadratic | 4 | 357   |
| CX-5461    | Setting 3 | quadratic | 5 | 2725  |
| CX-5461    | Setting 3 | quadratic | 6 | 6852  |
| CX-5461    | Setting 3 | linear    | 1 | 6     |
| CX-5461    | Setting 3 | linear    | 2 | 51    |
| CX-5461    | Setting 3 | linear    | 3 | 235   |
| CX-5461    | Setting 3 | linear    | 4 | 2132  |
| CX-5461    | Setting 3 | linear    | 5 | 14777 |
| Rapamycin  | Setting 3 | cubic     | 1 | 3     |
| Rapamycin  | Setting 3 | cubic     | 2 | 12    |
| Rapamycin  | Setting 3 | cubic     | 3 | 186   |
| Rapamycin  | Setting 3 | cubic     | 4 | 367   |
| Rapamycin  | Setting 3 | cubic     | 5 | 1873  |
| Rapamycin  | Setting 3 | cubic     | 6 | 6656  |
| Rapamycin  | Setting 3 | quadratic | 1 | 1     |
| Rapamycin  | Setting 3 | quadratic | 2 | 8     |
| Rapamycin  | Setting 3 | quadratic | 3 | 126   |
| Rapamycin  | Setting 3 | quadratic | 4 | 385   |
| Rapamycin  | Setting 3 | quadratic | 5 | 1757  |
| Rapamycin  | Setting 3 | quadratic | 6 | 12140 |
| Rapamycin  | Setting 3 | linear    | 1 | 1     |
| Rapamycin  | Setting 3 | linear    | 2 | 12    |
| Rapamycin  | Setting 3 | linear    | 3 | 101   |
| Rapamycin  | Setting 3 | linear    | 4 | 225   |
| Rapamycin  | Setting 3 | linear    | 5 | 1302  |
| Rapamycin  | Setting 3 | linear    | 6 | 7584  |
| Dactolisib | Setting 3 | cubic     | 1 | 1     |
| Dactolisib | Setting 3 | cubic     | 2 | 5     |
| Dactolisib | Setting 3 | cubic     | 3 | 54    |
| Dactolisib | Setting 3 | cubic     | 4 | 185   |
| Dactolisib | Setting 3 | cubic     | 5 | 338   |
| Dactolisib | Setting 3 | cubic     | 6 | 1719  |
| Dactolisib | Setting 3 | quadratic | 1 | 6     |
| Dactolisib | Setting 3 | quadratic | 2 | 6     |
| Dactolisib | Setting 3 | quadratic | 3 | 81    |
| Dactolisib | Setting 3 | quadratic | 4 | 197   |
| Dactolisib | Setting 3 | quadratic | 5 | 528   |

|             |           |           |   |      |
|-------------|-----------|-----------|---|------|
| Dactolisib  | Setting 3 | quadratic | 6 | 2469 |
| Dactolisib  | Setting 3 | linear    | 1 | 6    |
| Dactolisib  | Setting 3 | linear    | 2 | 14   |
| Dactolisib  | Setting 3 | linear    | 3 | 107  |
| Dactolisib  | Setting 3 | linear    | 4 | 179  |
| Dactolisib  | Setting 3 | linear    | 5 | 1045 |
| Dactolisib  | Setting 3 | linear    | 6 | 3689 |
| Talazoparib | Setting 3 | cubic     | 1 | 3    |
| Talazoparib | Setting 3 | cubic     | 2 | 5    |
| Talazoparib | Setting 3 | cubic     | 3 | 21   |
| Talazoparib | Setting 3 | cubic     | 4 | 94   |
| Talazoparib | Setting 3 | cubic     | 5 | 172  |
| Talazoparib | Setting 3 | cubic     | 6 | 317  |
| Talazoparib | Setting 3 | quadratic | 1 | 6    |
| Talazoparib | Setting 3 | quadratic | 2 | 7    |
| Talazoparib | Setting 3 | quadratic | 3 | 27   |
| Talazoparib | Setting 3 | quadratic | 4 | 84   |
| Talazoparib | Setting 3 | quadratic | 5 | 174  |
| Talazoparib | Setting 3 | quadratic | 6 | 365  |
| Talazoparib | Setting 3 | linear    | 1 | 5    |
| Talazoparib | Setting 3 | linear    | 2 | 12   |
| Talazoparib | Setting 3 | linear    | 3 | 68   |
| Talazoparib | Setting 3 | linear    | 4 | 131  |
| Talazoparib | Setting 3 | linear    | 5 | 323  |
| Talazoparib | Setting 3 | linear    | 6 | 3916 |

---

### 1.3 Iterative feature selection

The results of our runtime analysis clearly show that MERIDA has a significantly reduced runtime compared to LOBICO. However, since in our real performance analysis, the number of input features is considerably higher (1500 features), the number of possible logic combinations becomes very large and the parameter  $M$  had to be chosen carefully to balance between the runtime of the analysis and the expressiveness of the Boolean formulas. Whereas MERIDA could still identify models with up to  $M = 10$  features in an acceptable amount of time, LOBICO could mostly only handle 2 features. In order to simultaneously increase the parameter  $M$  and the number of input features for MERIDA without compromising the performance, we tested an iterative approach. To this end, we used the data sets for OSI-027, PIK-93, and Voxelisib, which we prepared as described in Supplement S1. Then we randomly drew 400 features for each of the drugs and use these as input features for the analyses described in the following.

For each of the three drugs, we trained models with  $M \in \{1, \dots, 16\}$  in one-shot, i.e. without any iterative selection. In addition, we tested an iterative procedure: we first selected the best model among the models with  $M = 1$  to  $M = 6$  using Youden’s  $J$ . Then, we iteratively increased  $M$  by 4 putative features and selected the best model using Youden’s  $J$  until we could fit a model with  $M = 16$ . Figure 3 shows the results of this analysis for the cubic weight function. It can be seen, that the overall runtime (including all necessary cross-validation steps) can be reduced by a factor of 25 on average. Moreover, the selected feature sets for the two approaches resemble each other significantly (Fisher’s exact test p-value  $< 0.05$ ). Based on these tests, we decided to perform the iterative analysis in the main manuscript similarly: we initially fit models with  $M$  in the range of 1 to 6 and increase  $M$  by 4 putative features in each iteration.

## OSI-027

| M  | No iteration                                                                                                                                                                                             | Iteration                                                                                                                                                                                            | P-value  |
|----|----------------------------------------------------------------------------------------------------------------------------------------------------------------------------------------------------------|------------------------------------------------------------------------------------------------------------------------------------------------------------------------------------------------------|----------|
| 2  | Sensitive: SPOP_high_expr,<br>TJP1_low_expr                                                                                                                                                              | Sensitive: SPOP_high_expr, TJP1_low_expr                                                                                                                                                             | —        |
| 3  | Sensitive: SPOP_high_expr,<br>TJP1_low_expr<br><br>Resistant: CSNK2A1_high_expr                                                                                                                          | Sensitive: SPOP_high_expr, TJP1_low_expr<br><br>Resistant: CSNK2A1_high_expr                                                                                                                         | 1.25e-05 |
| 4  | Sensitive: SPOP_high_expr,<br>TJP1_low_expr<br><br>Resistant: FAF1_low_expr,<br>DIS3_low_expr                                                                                                            | Sensitive: SPOP_high_expr, TJP1_low_expr<br><br>Resistant: CSNK2A1_high_expr,<br>PSIP1_low_expr                                                                                                      | 0.00044  |
| 5  | Sensitive: SPOP_high_expr,<br>TJP1_low_expr<br><br>Resistant: FAF1_low_expr,<br>DIS3_low_expr, PSIP1_low_expr                                                                                            | Sensitive: SPOP_high_expr, TJP1_low_expr<br><br>Resistant: CSNK2A1_high_expr,<br>PSIP1_low_expr, HLF_high_expr                                                                                       | 9.37e-06 |
| 6  | Sensitive: SPOP_high_expr,<br>TJP1_low_expr<br><br>Resistant: FAF1_low_expr,<br>DIS3_low_expr, PSIP1_low_expr,<br>HLF_high_expr                                                                          | Sensitive: SPOP_high_expr, TJP1_low_expr<br><br>Resistant: CSNK2A1_high_expr,<br>PSIP1_low_expr, HLF_high_expr,<br>FAF1_low_expr                                                                     | 4.31e-10 |
| 7  | Sensitive: SPOP_high_expr,<br>TJP1_low_expr, ARID1B_high_expr<br><br>Resistant: FAF1_low_expr,<br>DIS3_low_expr, HLF_high_expr,<br>ATR1_low_expr                                                         | Sensitive: SPOP_high_expr, TJP1_low_expr<br><br>Resistant: CSNK2A1_high_expr,<br>PSIP1_low_expr, HLF_high_expr,<br>FAF1_low_expr, PLXNB2_Unknown                                                     | 1.44e-06 |
| 8  | Sensitive: SPOP_high_expr,<br>TJP1_low_expr, ARID1B_high_expr<br><br>Resistant: FAF1_low_expr,<br>DIS3_low_expr, HLF_high_expr,<br>PSIP1_low_expr, HSP90AA1_Unknown                                      | Sensitive: SPOP_high_expr,<br>TJP1_low_expr, FMR1_Unknown<br><br>Resistant: CSNK2A1_high_expr,<br>PSIP1_low_expr, HLF_high_expr,<br>FAF1_low_expr, PLXNB2_Unknown                                    | 3.69e-08 |
| 9  | Sensitive: SPOP_high_expr,<br>TJP1_low_expr, ARID1B_high_expr<br><br>Resistant: FAF1_low_expr,<br>DIS3_low_expr, HLF_high_expr,<br>PSIP1_low_expr, HSP90AA1_Unknown,<br>ERBB3_Unknown                    | Sensitive: SPOP_high_expr,<br>TJP1_low_expr, FMR1_Unknown<br><br>Resistant: CSNK2A1_high_expr,<br>PSIP1_low_expr, HLF_high_expr,<br>FAF1_low_expr, PLXNB2_Unknown,<br>EP300_low_expr                 | 1.84e-07 |
| 10 | Sensitive: SPOP_high_expr,<br>TJP1_low_expr, ARID1B_high_expr<br><br>Resistant: FAF1_low_expr,<br>HLF_high_expr, PSIP1_low_expr,<br>HSP90AA1_Unknown,<br>ERBB3_Unknown, CAD_high_expr,<br>PLXNB2_Unknown | Sensitive: SPOP_high_expr,<br>TJP1_low_expr, FMR1_Unknown<br><br>Resistant: CSNK2A1_high_expr,<br>PSIP1_low_expr, HLF_high_expr,<br>FAF1_low_expr, PLXNB2_Unknown,<br>EP300_low_expr, CDK4_high_expr | 7.77e-09 |

| M          | No iteration                                                                                                                                                                                                                                                                                         | Iteration                                                                                                                                                                                                                                                                                             | P-value  |
|------------|------------------------------------------------------------------------------------------------------------------------------------------------------------------------------------------------------------------------------------------------------------------------------------------------------|-------------------------------------------------------------------------------------------------------------------------------------------------------------------------------------------------------------------------------------------------------------------------------------------------------|----------|
| 12         | <p>Sensitive: SPOP_high_expr, TJP1_low_expr, ARID1B_high_expr</p> <p>Resistant: FAF1_low_expr, HLF_high_expr, PSIP1_low_expr, HSP90AA1_Unknown, ERBB3_Unknown, CAD_high_expr, PLXNB2_Unknown, HSP90AA1_low_expr, CDK4_high_expr</p>                                                                  | <p>Sensitive: SPOP_high_expr, TJP1_low_expr, FMR1_Unknown</p> <p>Resistant: CSNK2A1_high_expr, PSIP1_low_expr, HLF_high_expr, FAF1_low_expr, PLXNB2_Unknown, EP300_low_expr, CDK4_high_expr, CAD_high_expr, HSP90AA1_Unknown</p>                                                                      | 7.18e-14 |
| 14         | <p>Sensitive: SPOP_high_expr, TJP1_low_expr, ARID1B_high_expr, CHEK2_low_expr</p> <p>Resistant: FAF1_low_expr, HLF_high_expr, PSIP1_low_expr, HSP90AA1_Unknown, ERBB3_Unknown, CAD_high_expr, PLXNB2_Unknown, CDK4_high_expr, RTN4_high_expr, EZH2_low_expr</p>                                      | <p>Sensitive: SPOP_high_expr, TJP1_low_expr, FMR1_Unknown, CHEK2_low_expr</p> <p>Resistant: CSNK2A1_high_expr, PSIP1_low_expr, HLF_high_expr, FAF1_low_expr, PLXNB2_Unknown, EP300_low_expr, CDK4_high_expr, CAD_high_expr, HSP90AA1_Unknown, RTN4_high_expr</p>                                      | 1.41e-16 |
| 16         | <p>Sensitive: SPOP_high_expr, TJP1_low_expr, ARID1B_high_expr, CHEK2_low_expr, SRN1_high_expr</p> <p>Resistant: RTN4_high_expr, ARFGAP2_low_expr, HSP90AA1_Unknown, FAF1_low_expr, CAD_high_expr, PSIP1_low_expr, PLXNB2_Unknown, CTTN_high_expr, CDK4_high_expr, ACSL6_high_expr, ERBB3_Unknown</p> | <p>Sensitive: SPOP_high_expr, TJP1_low_expr, FMR1_Unknown, CHEK2_low_expr</p> <p>Resistant: CSNK2A1_high_expr, PSIP1_low_expr, HLF_high_expr, FAF1_low_expr, PLXNB2_Unknown, EP300_low_expr, CDK4_high_expr, CAD_high_expr, HSP90AA1_Unknown, RTN4_high_expr, HSP90AA1_low_expr, PPP2R1A_low_expr</p> | 2.28e-12 |
| Total Time | 33135 s                                                                                                                                                                                                                                                                                              | 1144 s                                                                                                                                                                                                                                                                                                |          |

PIK-93

| M  | No iteration                                                                                                                                                                                                                               | Iteration                                                                                                                                                                                                                                 |          |
|----|--------------------------------------------------------------------------------------------------------------------------------------------------------------------------------------------------------------------------------------------|-------------------------------------------------------------------------------------------------------------------------------------------------------------------------------------------------------------------------------------------|----------|
| 2  | sensitive: PTPRF_low_expr,<br>CTTN_low_expr                                                                                                                                                                                                | sensitive: PTPRF_low_expr,<br>CTTN_low_expr                                                                                                                                                                                               | —        |
| 5  | sensitive: NTRK1_CNVgain,<br>PPM1D_Unknown,<br>NCKAP1_low_expr,<br>MED23_high_expr, CTTN_low_expr                                                                                                                                          | sensitive: PTPRF_low_expr,<br>CTTN_low_expr, CCND1_high_expr,<br>PPM1D_Unknown, NTRK1_CNVgain                                                                                                                                             | 9.37e-06 |
| 8  | sensitive: FRG1_high_expr,<br>NTRK1_CNVgain, ELF1_high_expr,<br>PPM1D_Unknown,<br>NCKAP1_low_expr, CTTN_low_expr<br><br>resistant: DICER1_low_expr,<br>MMP2_high_expr                                                                      | sensitive: PTPRF_low_expr,<br>CTTN_low_expr, CCND1_high_expr,<br>PPM1D_Unknown, NTRK1_CNVgain,<br>NCKAP1_low_expr<br><br>resistant: DICER1_low_expr,<br>MMP2_high_expr                                                                    | 1.41e-10 |
| 9  | sensitive: FRG1_high_expr,<br>NTRK1_CNVgain, ELF1_high_expr,<br>PPM1D_Unknown,<br>NCKAP1_low_expr, CTTN_low_expr<br><br>resistant: DICER1_low_expr,<br>MMP2_high_expr,<br>PLXNA1_high_expr                                                 | sensitive: PTPRF_low_expr,<br>CTTN_low_expr, CCND1_high_expr,<br>PPM1D_Unknown, NTRK1_CNVgain,<br>NCKAP1_low_expr<br><br>resistant: DICER1_low_expr,<br>MMP2_high_expr, DLG1_low_expr                                                     | 1.26e-09 |
| 10 | sensitive: ING1_low_expr,<br>NTRK1_CNVgain,<br>PPM1D_Unknown,<br>NCKAP1_low_expr,<br>MED23_high_expr, CTTN_low_expr<br><br>resistant: DICER1_low_expr,<br>TBX3_high_expr, NTN4_high_expr,<br>ATRX_low_expr                                 | sensitive: PTPRF_low_expr,<br>CTTN_low_expr, CCND1_high_expr,<br>PPM1D_Unknown, NTRK1_CNVgain,<br>NCKAP1_low_expr<br><br>resistant: DICER1_low_expr,<br>MMP2_high_expr, DLG1_low_expr,<br>IRF6_high_expr                                  | 7.23e-07 |
| 11 | sensitive: ING1_low_expr,<br>NTRK1_CNVgain,<br>PPM1D_Unknown,<br>NCKAP1_low_expr,<br>MED23_high_expr, CTTN_low_expr<br><br>resistant: ANK3_high_expr,<br>DICER1_low_expr, TBX3_high_expr,<br>NTN4_high_expr, ATRX_low_expr                 | sensitive: PTPRF_low_expr,<br>CTTN_low_expr, CCND1_high_expr,<br>PPM1D_Unknown, NTRK1_CNVgain,<br>NCKAP1_low_expr<br><br>resistant: DICER1_low_expr,<br>MMP2_high_expr, DLG1_low_expr,<br>IRF6_high_expr, MYD88_Unknown                   | 2.37e-06 |
| 12 | sensitive: HDAC3_low_expr,<br>NCKAP1_low_expr,<br>MED23_high_expr, CTTN_low_expr,<br>ASXL1_Unknown<br><br>resistant: TBX3_high_expr,<br>ANK3_high_expr, MED12_low_expr,<br>CAD_low_expr, IRF6_high_expr,<br>FXR1_low_expr, ERBB3_high_expr | sensitive: PTPRF_low_expr,<br>CTTN_low_expr, CCND1_high_expr,<br>PPM1D_Unknown, NTRK1_CNVgain,<br>NCKAP1_low_expr<br><br>resistant: DICER1_low_expr,<br>MMP2_high_expr, DLG1_low_expr,<br>IRF6_high_expr, MYD88_Unknown,<br>ATRX_low_expr | 0.0039   |

| M          | No iteration                                                                                                                                                                                                                                                                                 | Iteration                                                                                                                                                                                                                                                                                                    |          |
|------------|----------------------------------------------------------------------------------------------------------------------------------------------------------------------------------------------------------------------------------------------------------------------------------------------|--------------------------------------------------------------------------------------------------------------------------------------------------------------------------------------------------------------------------------------------------------------------------------------------------------------|----------|
| 13         | sensitive: HDAC3_low_expr,<br>NCKAP1_low_expr,<br>MED23_high_expr, CTTN_low_expr,<br>ASXL1_Unknown, MNDA_high_expr<br><br>resistant: TBX3_high_expr,<br>ANK3_high_expr, MED12_low_expr,<br>CAD_low_expr, IRF6_high_expr,<br>FXR1_low_expr, ERBB3_high_expr                                   | sensitive: PTPRF_low_expr,<br>CTTN_low_expr, CCND1_high_expr,<br>PPM1D_Unknown, NTRK1_CNVgain,<br>NCKAP1_low_expr<br><br>resistant: DICER1_low_expr,<br>MMP2_high_expr, DLG1_low_expr,<br>IRF6_high_expr, MYD88_Unknown,<br>ATRX_low_expr, NRAS_high_expr                                                    | 0.0063   |
| 16         | sensitive: ATR_low_expr,<br>ROBO2_high_expr,<br>FRG1_high_expr, NTRK1_CNVgain,<br>FAT1_low_expr, CTTN_low_expr<br><br>resistant: AMER1_low_expr,<br>PCDH18_high_expr,<br>DLG1_low_expr, IRF6_high_expr,<br>TBX3_high_expr, FN1_high_expr,<br>MYH10_Unknown,<br>ACACA_low_expr, ATRX_low_expr | sensitive: PTPRF_low_expr,<br>CTTN_low_expr, CCND1_high_expr,<br>PPM1D_Unknown, NTRK1_CNVgain,<br>FAT1_low_expr, NCKAP1_low_expr<br><br>resistant: DICER1_low_expr,<br>MMP2_high_expr, DLG1_low_expr,<br>IRF6_high_expr, MYD88_Unknown,<br>ATRX_low_expr, ELF1_low_expr,<br>ACACA_low_expr, PCDH18_high_expr | 9.43e-09 |
| Total Time | 35446 s                                                                                                                                                                                                                                                                                      | 1318 s                                                                                                                                                                                                                                                                                                       |          |

Voxtalisib

| M  | No iteration                                                                                                                                                                                                                                   | Iteration                                                                                                                                                                                                                               | P-value  |
|----|------------------------------------------------------------------------------------------------------------------------------------------------------------------------------------------------------------------------------------------------|-----------------------------------------------------------------------------------------------------------------------------------------------------------------------------------------------------------------------------------------|----------|
| 4  | sensitive: MYC_Unknown, MYH10_high_expr, BCL11A_high_expr, SCAI_high_expr                                                                                                                                                                      | sensitive: MYC_Unknown, MYH10_high_expr, BCL11A_high_expr, SCAI_high_expr                                                                                                                                                               | —        |
| 8  | sensitive: MYC_Unknown, AFF4_low_expr, CREBBP_Loss-of-function, BCL11A_high_expr, SCAI_high_expr<br><br>resistant: SVEP1_Unknown, PTPRU_high_expr, CHD4_Unknown                                                                                | sensitive: MYC_Unknown, MYH10_high_expr, BCL11A_high_expr, SCAI_high_expr, STK11_Unknown, FAT2_CNVloss, PRKAR1A_high_expr<br><br>resistant: AKAP9_Unknown                                                                               | 0.00028  |
| 9  | sensitive: MYC_Unknown, SPOP_low_expr, CREBBP_Loss-of-function, FAT2_CNVloss, BCL11A_high_expr, SCAI_high_expr<br><br>resistant: SVEP1_Unknown, AKAP9_Unknown, ANK3_Unknown                                                                    | sensitive: MYC_Unknown, MYH10_high_expr, BCL11A_high_expr, SCAI_high_expr, STK11_Unknown, FAT2_CNVloss, PRKAR1A_high_expr<br><br>resistant: AKAP9_Unknown, STK11_low_expr                                                               | 1.84e-07 |
| 10 | sensitive: MYC_Unknown, MYH10_high_expr, FAT2_CNVloss, STK11_Unknown, BCL11A_high_expr, SCAI_high_expr, PRKAR1A_high_expr<br><br>resistant: CHD1L_Unknown, AKAP9_Unknown, STK11_low_expr                                                       | sensitive: MYC_Unknown, MYH10_high_expr, BCL11A_high_expr, SCAI_high_expr, STK11_Unknown, FAT2_CNVloss, PRKAR1A_high_expr<br><br>resistant: AKAP9_Unknown, STK11_low_expr, CHD1L_Unknown                                                | 3.8e-20  |
| 12 | sensitive: MYC_Unknown, MYH10_high_expr, FAT2_CNVloss, STK11_Unknown, BCL11A_high_expr, SCAI_high_expr, PRKAR1A_high_expr<br><br>resistant: RFC4_high_expr, CHD1L_Unknown, RPL22_low_expr, AKAP9_Unknown, STK11_low_expr                       | sensitive: MYC_Unknown, MYH10_high_expr, BCL11A_high_expr, SCAI_high_expr, STK11_Unknown, FAT2_CNVloss, PRKAR1A_high_expr<br><br>resistant: AKAP9_Unknown, STK11_low_expr, CHD1L_Unknown, RFC4_high_expr, RPL22_low_expr                | 3.37e-23 |
| 13 | sensitive: MYC_Unknown, CREBBP_Loss-of-function, FAT2_CNVloss, MTOR_Neural, STK11_Unknown, BCL11A_high_expr, SCAI_high_expr, PIK3C2B_low_expr<br><br>resistant: F8_high_expr, AHCTF1_low_expr, MYB_Unknown, RB1_Loss-of-function, CHD4_Unknown | sensitive: MYC_Unknown, MYH10_high_expr, BCL11A_high_expr, SCAI_high_expr, STK11_Unknown, FAT2_CNVloss, PRKAR1A_high_expr, CDK12_Unknown<br><br>resistant: AKAP9_Unknown, STK11_low_expr, CHD1L_Unknown, RFC4_high_expr, RPL22_low_expr | 1.73e-05 |

| M          | No iteration                                                                                                                                                                                                                                                                                                                 | Iteration                                                                                                                                                                                                                                                                                                      | P-value  |
|------------|------------------------------------------------------------------------------------------------------------------------------------------------------------------------------------------------------------------------------------------------------------------------------------------------------------------------------|----------------------------------------------------------------------------------------------------------------------------------------------------------------------------------------------------------------------------------------------------------------------------------------------------------------|----------|
| 16         | sensitive: MYC_Unknown,<br>CREBBP_Loss-of-function,<br>FAT2_CNVloss, MTOR_Neutral,<br>STK11_Unknown,<br>BCL11A_high_expr, SCAI_high_expr,<br>PIK3C2B_low_expr, SF3B1_low_expr<br><br>resistant: F8_high_expr,<br>DIS3_low_expr, AHCTF1_low_expr,<br>MYB_Unknown, RB1_Loss-of-<br>function, DICER1_high_expr,<br>CHD4_Unknown | sensitive: MYC_Unknown,<br>MYH10_high_expr, BCL11A_high_expr,<br>SCAI_high_expr, STK11_Unknown,<br>FAT2_CNVloss, PRKAR1A_high_expr,<br>SF3B1_low_expr<br><br>resistant: EEF1A1_low_expr,<br>DIS3_low_expr, AKAP9_Unknown,<br>STK11_low_expr, CHD1L_Unknown,<br>RFC4_high_expr, RPL22_low_expr,<br>CHD4_Unknown | 9.43e-09 |
| Total Time | 10893 s                                                                                                                                                                                                                                                                                                                      | 520 s                                                                                                                                                                                                                                                                                                          |          |

Figure 3: In this figure, we present a comparison between the selected features of a one-shot approach and an iterative selection for OSI-027, PIK-93, and Voxtalisib using the cubic weight function. We show the feature sets for the best  $M$  value in each iteration compared to the model of the same size in the one-shot approach. Common features are marked in magenta, blue features only occur in one of the approaches and black features appear in both approaches but not for the given value of  $M$ . We start with the best model among  $M = 1$  to  $M = 6$  and then iteratively add 4 putative features until we reach a possible model size of  $M = 16$ . For  $M = 16$ , we simply show the first model of this size, which is reached in the last iteration. This model does not correspond to the best model of the last iteration. The given p-value is the Fisher’s exact test p-value for the intersection of the feature sets. The total time refers to the time needed to fit all models including all  $M$  values and CV steps.

## 2 Enrichment analysis

In order to determine whether the selected biomarkers for the drugs that we investigated are of broad importance to various drugs, we decided to perform an enrichment analysis on the gene expression data. Specifically, we performed Kolmogorov-Smirnov tests (Hollander *et al.*, 2013) for sets of cell lines (categories) on a ranked list of cell lines for each drug using the GeneTrail3 C++ library (Gerstner *et al.*, 2020).

In the following, we will first describe how we obtain the categories and the ranked lists of cell lines. Afterwards, we will outline how the enrichment analysis is performed. Lastly, we present the results of the analysis for all of the genes that have been selected by MERIDA.

### 2.1 Category definition

To derive categories, we use the z-score based definitions for up- and down-regulated genes as described in Section 2.2 of the main text: In particular, we calculate for each gene one z-score and consider the cell lines with a z-score above 1.68 as up-regulated and the cell lines with a z-score below -1.68 as down-regulated. We then define two categories per gene, the first category contains all cell lines that are up-regulated, the second category contains all cell lines that are down-regulated. From these categories, we assembled two category databases, one that contains all up-regulated categories and one that contains all down-regulated categories. In contrast to the analysis in the main manuscript, we do not consider any splitting into training and test set for this analysis, i.e. the categories are defined on the whole data set available per drug.

### 2.2 Definition of ranked lists

For each drug, we employ the given logarithmized IC50 values from the GDSC database to increasingly sort the cell lines from sensitive to resistant responses. If there is drug response data in GDSC1 and GDSC2, we construct two sorted lists in order to avoid mixing up data from different drug response assays. The positions in the sorted list then serve as ranks for the cell lines.

### 2.3 Enrichment analysis results

We employ the GeneTrail C++ library for performing a Gene Set Enrichment Analysis (GSEA) like analysis with the custom categories and ranked lists as described above, i.e. we test for an enrichment of a specific category at the top or bottom of a ranked cell line list. We use the Benjamini-Hochberg procedure (Hochberg and Benjamini, 1990) to adjust the resulting p-values. We consider results as significant at the significance level  $\alpha = 0.05$ .

Tables 9 + 10 show the result of this analysis for the genes that have been selected by MERIDA.

Table 9: The table shows the number of times a lowly expressed gene has been enriched or depleted.

| Gene     | #Enriched GDSC1 | #Enriched GDSC2 | #Depleted GDSC1 | #Depleted GDSC2 |
|----------|-----------------|-----------------|-----------------|-----------------|
| IDH1     | 8               | 33              | 3               | 1               |
| PIK3CB   | 65              | 40              | 8               | 0               |
| FRG1     | 0               | 0               | 20              | 56              |
| CYTH4    | 0               | 0               | 0               | 0               |
| TJP1     | 258             | 156             | 13              | 0               |
| PTPRF    | 205             | 150             | 12              | 1               |
| MAP4K1   | 0               | 0               | 0               | 0               |
| IREB2    | 8               | 0               | 16              | 18              |
| MLL2     | 1               | 1               | 0               | 4               |
| DDX5     | 3               | 0               | 40              | 4               |
| WIPF1    | 0               | 0               | 0               | 0               |
| SMARCB1  | 0               | 0               | 20              | 16              |
| RGS3     | 0               | 0               | 0               | 0               |
| HDAC9    | 0               | 0               | 0               | 0               |
| EPC1     | 1               | 0               | 4               | 13              |
| AHCTF1   | 1               | 1               | 9               | 2               |
| ADCY1    | 0               | 0               | 0               | 0               |
| ROBO2    | 0               | 0               | 0               | 0               |
| ERBB2    | 0               | 0               | 0               | 0               |
| PPP6C    | 2               | 0               | 38              | 86              |
| FOXA1    | 0               | 0               | 0               | 0               |
| TBX3     | 0               | 0               | 0               | 0               |
| KAT6B    | 0               | 0               | 5               | 3               |
| SOX9     | 0               | 0               | 0               | 0               |
| JMY      | 0               | 0               | 3               | 0               |
| GNG2     | 0               | 0               | 0               | 0               |
| VHL      | 6               | 0               | 35              | 46              |
| ACO1     | 44              | 63              | 8               | 0               |
| HDAC3    | 0               | 0               | 1               | 0               |
| SFPQ     | 0               | 0               | 2               | 14              |
| NCKAP1   | 239             | 156             | 10              | 0               |
| FKBP5    | 0               | 0               | 0               | 0               |
| NTRK2    | 0               | 0               | 0               | 0               |
| PPP2R5A  | 16              | 15              | 35              | 3               |
| HSP90AB1 | 0               | 0               | 9               | 0               |

|         |     |     |    |    |
|---------|-----|-----|----|----|
| XPO1    | 0   | 0   | 9  | 1  |
| PTGS1   | 0   | 0   | 0  | 0  |
| CNOT3   | 0   | 0   | 1  | 6  |
| STARD13 | 0   | 0   | 0  | 0  |
| IDH2    | 6   | 0   | 0  | 0  |
| FMR1    | 1   | 5   | 2  | 1  |
| ZNF638  | 0   | 0   | 16 | 10 |
| ADAM10  | 10  | 0   | 24 | 7  |
| TCF4    | 0   | 0   | 0  | 0  |
| TCF7L2  | 0   | 0   | 0  | 0  |
| CDC73   | 1   | 0   | 0  | 0  |
| PBRM1   | 3   | 0   | 62 | 42 |
| ARHGEF6 | 0   | 0   | 0  | 0  |
| CCND1   | 33  | 42  | 14 | 0  |
| BCL11A  | 0   | 0   | 0  | 0  |
| KLF6    | 111 | 119 | 7  | 0  |
| CLASP2  | 0   | 0   | 14 | 11 |
| CASP8   | 32  | 58  | 30 | 1  |
| FBXW7   | 0   | 0   | 2  | 2  |
| HLA-B   | 34  | 65  | 66 | 5  |
| MYC     | 16  | 12  | 85 | 7  |
| DNMT3A  | 0   | 0   | 0  | 0  |
| MFNG    | 0   | 0   | 0  | 0  |
| RBM10   | 2   | 1   | 67 | 11 |
| MYH9    | 15  | 45  | 11 | 2  |
| TCF12   | 1   | 0   | 0  | 0  |
| UPF3B   | 0   | 0   | 57 | 38 |
| ARFGEF2 | 5   | 9   | 5  | 0  |
| ARID2   | 0   | 0   | 56 | 16 |
| NAP1L1  | 0   | 1   | 52 | 58 |
| AHNAK   | 173 | 144 | 15 | 3  |

---

Table 10: The table shows the number of times a highly expressed gene has been enriched or depleted.

| Gene     | #Enriched GDSC1 | #Enriched GDSC2 | #Depleted GDSC1 | #Depleted GDSC2 |
|----------|-----------------|-----------------|-----------------|-----------------|
| IDH1     | 0               | 1               | 28              | 98              |
| PIK3CB   | 11              | 5               | 2               | 1               |
| FRG1     | 184             | 139             | 6               | 0               |
| CYTH4    | 205             | 152             | 4               | 0               |
| TJP1     | 0               | 0               | 0               | 0               |
| PTPRF    | 0               | 0               | 7               | 0               |
| MAP4K1   | 191             | 151             | 15              | 3               |
| IREB2    | 155             | 123             | 5               | 0               |
| MLL2     | 143             | 113             | 2               | 0               |
| DDX5     | 14              | 0               | 0               | 0               |
| WIPF1    | 193             | 150             | 13              | 1               |
| SMARCB1  | 193             | 146             | 9               | 2               |
| RGS3     | 24              | 4               | 51              | 43              |
| HDAC9    | 10              | 0               | 1               | 2               |
| EPC1     | 177             | 129             | 6               | 1               |
| AHCTF1   | 53              | 20              | 6               | 0               |
| ADCY1    | 22              | 33              | 58              | 6               |
| ROBO2    | 112             | 117             | 5               | 1               |
| ERBB2    | 20              | 9               | 57              | 48              |
| PPP6C    | 38              | 20              | 8               | 1               |
| FOXA1    | 1               | 6               | 184             | 109             |
| TBX3     | 3               | 0               | 56              | 30              |
| KAT6B    | 153             | 127             | 7               | 2               |
| SOX9     | 0               | 0               | 24              | 16              |
| JMY      | 40              | 97              | 4               | 0               |
| GNG2     | 138             | 122             | 8               | 1               |
| VHL      | 128             | 140             | 6               | 0               |
| ACO1     | 11              | 1               | 70              | 50              |
| HDAC3    | 26              | 17              | 1               | 0               |
| SFPQ     | 80              | 94              | 6               | 0               |
| NCKAP1   | 0               | 0               | 0               | 0               |
| FKBP5    | 192             | 150             | 10              | 2               |
| NTRK2    | 0               | 0               | 24              | 3               |
| PPP2R5A  | 10              | 4               | 2               | 0               |
| HSP90AB1 | 6               | 33              | 3               | 0               |
| XPO1     | 17              | 12              | 5               | 1               |
| PTGS1    | 37              | 10              | 0               | 1               |
| CNOT3    | 15              | 30              | 1               | 0               |
| STARD13  | 28              | 23              | 0               | 0               |

|         |     |     |     |     |
|---------|-----|-----|-----|-----|
| IDH2    | 33  | 58  | 12  | 2   |
| FMR1    | 2   | 1   | 20  | 2   |
| ZNF638  | 62  | 44  | 6   | 0   |
| ADAM10  | 2   | 0   | 27  | 21  |
| TCF4    | 146 | 131 | 14  | 1   |
| TCF7L2  | 8   | 2   | 38  | 55  |
| CDC73   | 3   | 1   | 9   | 3   |
| PBRM1   | 181 | 119 | 6   | 1   |
| ARHGEF6 | 237 | 151 | 9   | 0   |
| CCND1   | 8   | 2   | 5   | 1   |
| BCL11A  | 200 | 146 | 8   | 0   |
| KLF6    | 6   | 2   | 59  | 41  |
| CLASP2  | 133 | 120 | 10  | 2   |
| CASP8   | 105 | 89  | 0   | 0   |
| FBXW7   | 147 | 137 | 11  | 0   |
| HLA-B   | 0   | 0   | 0   | 0   |
| MYC     | 0   | 0   | 0   | 0   |
| DNMT3A  | 135 | 126 | 11  | 2   |
| MFNG    | 224 | 151 | 13  | 1   |
| RBM10   | 76  | 60  | 17  | 2   |
| MYH9    | 18  | 1   | 120 | 70  |
| TCF12   | 106 | 92  | 20  | 5   |
| UPF3B   | 72  | 93  | 16  | 2   |
| ARFGEF2 | 0   | 0   | 107 | 116 |
| ARID2   | 162 | 129 | 7   | 1   |
| NAP1L1  | 153 | 72  | 2   | 0   |
| AHNAK   | 2   | 0   | 23  | 30  |

---

### 3 Comparison to other machine learning approaches

In the main manuscript, we present a detailed performance evaluation between MERIDA and LOBICO, which are both methods based on the idea of using an ILP formulation for synthesizing a logical rule for drug sensitivity prediction (cf. Supplement S3 for an in-depth comparison). To show that our MERIDA method is also competitive to standard machine learning methods, we fitted models for random forests (Breiman, 2001) and k-nearest neighbors (Fix and Hodges, 1952) using the implementations provided by the R caret package (Kuhn, 2020). In the following, we will first outline how we prepared the data and fitted the models and then present the results.

#### 3.1 Data preparation and model fitting

We used the data sets as prepared for our main analysis and described in our main manuscript (Section 2.2) and Supplement S1. In particular, we consider the same partition into training and test set. We fitted models for Setting 1, i.e. the matrix without any included a priori knowledge.

For random forests, we employ the *rf* method offered by the package caret to fit a model. We use the default settings for this package except for the parameter *mtry*, the number of considered features to determine the optimal split in a node, for which we do a grid search in the range of  $[\max(\sqrt{\#Features} - 50, 1), \sqrt{\#Features} + 50]$  with a step size of 2. Here,  $\sqrt{\#Features}$  is the default value that is often used in classification for random forests and also in the package used by caret (Liaw and Wiener, 2002). Analogously to our main analysis, we perform a 5-fold CV on the training set and apply the best model fitted on the complete training data to the test set. As model selection criterion for the best model we opted for the area under the ROC curve, which should in general balance between sensitivity and specificity, and sensitivity alone.

For KNN, we use the *knn* method included in the caret package. We optimize the only parameter available for this package: *k*. It represents the number of neighbors to consider for prediction and we try values in the range of  $[1, 50]$  with a step size of 2. Similar to random forests, we conducted a 5-fold CV on the training set and apply the best model to the test set. We also employed the same selection criteria, i.e. area under the ROC curve and sensitivity.

#### 3.2 Results

Figures 4 to 11 depict the performance for random forests and k-nearest neighbors using both of the mentioned model selection criteria. In Figure 12 and 13, the performance of MERIDA for all 41 drugs is shown.

For k-nearest neighbors, the ROC selection criterion leads to models with high specificity and very low sensitivity for all of the investigated 41 drugs. Notably, almost only drugs that are balanced with respect to sensitive and resistant cell lines (CX-5461, NSC319726, Niraparib, Omipalisib, Talazoparib) achieve sensitivities different from 0. By selecting the best model based on sensitivity alone, the average sensitivity could be improved (see

Figure 6 and 7). However, it is still much lower than for our MERIDA method (cf. Figure 12 and 13).

For random forests, it can similarly be seen that the average sensitivity is comparatively low and is also only marginally improved by using sensitivity as selection criterion. In general, drugs with less class imbalance also seem to achieve a better prediction performance.

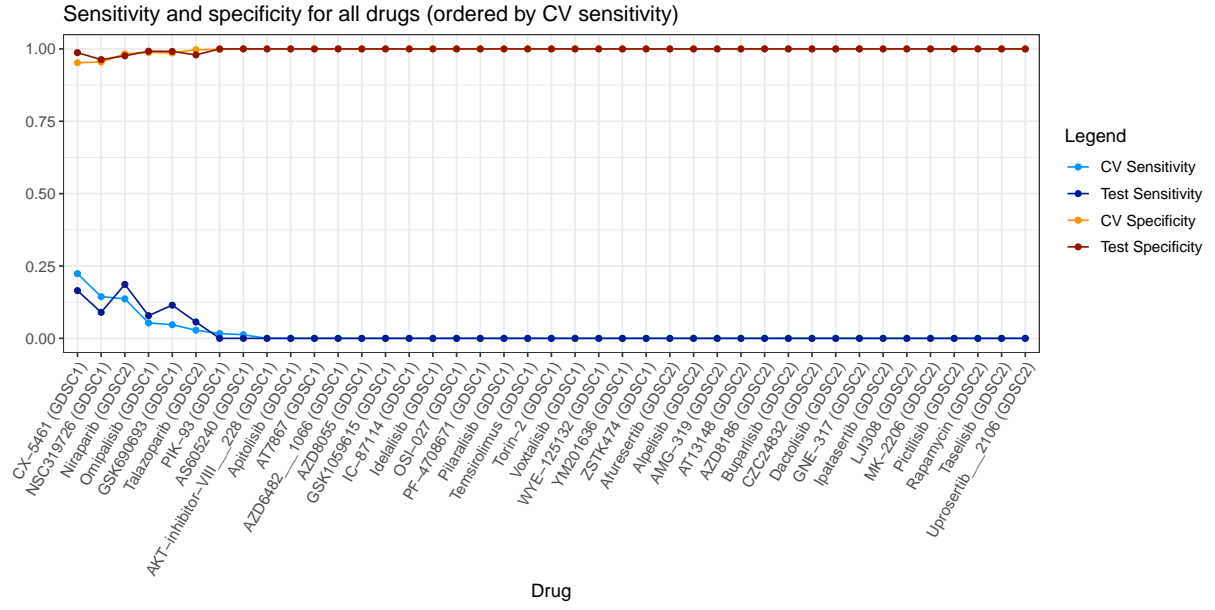

Figure 4: This figure depicts the statistical performance of the best KNN model in Setting 1 for all 41 drugs using the ROC as selection criterion.

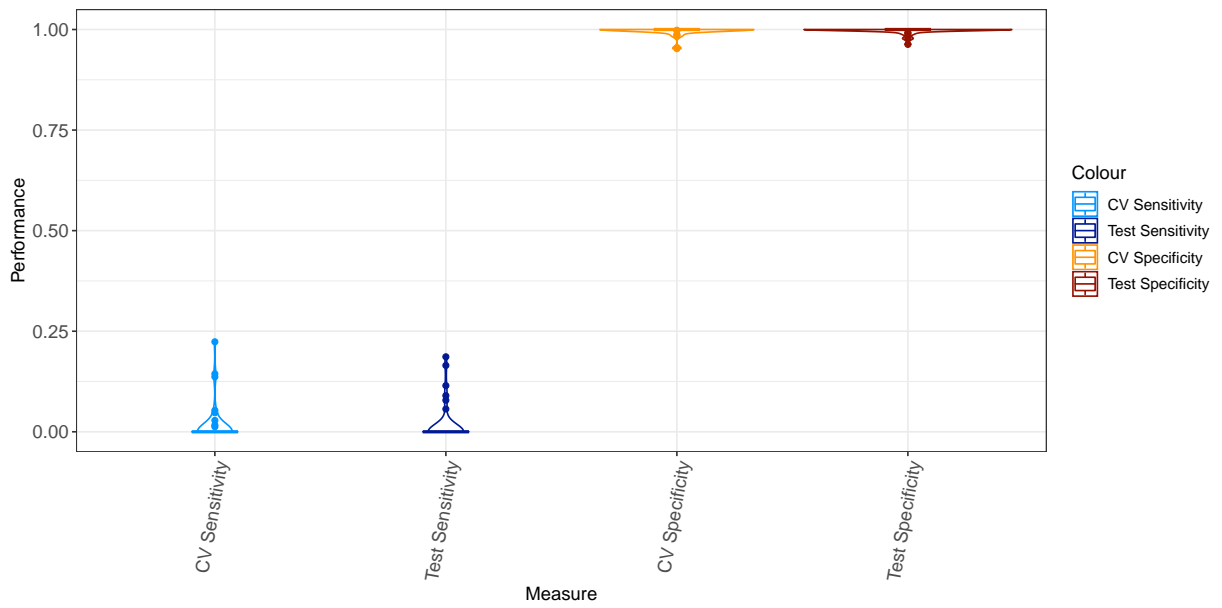

Figure 5: This figure depicts the averaged statistical performance of the best KNN model in Setting 1 for all 41 drugs using the ROC as selection criterion.

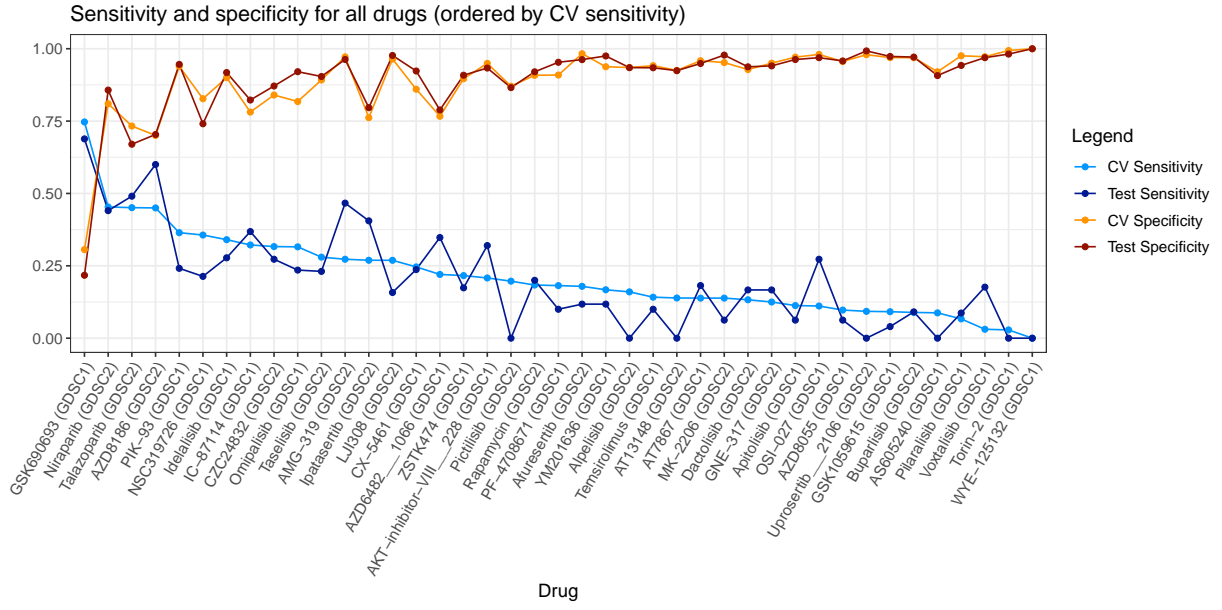

Figure 6: This figure depicts the statistical performance of the best KNN model in Setting 1 for all 41 drugs using sensitivity as selection criterion.

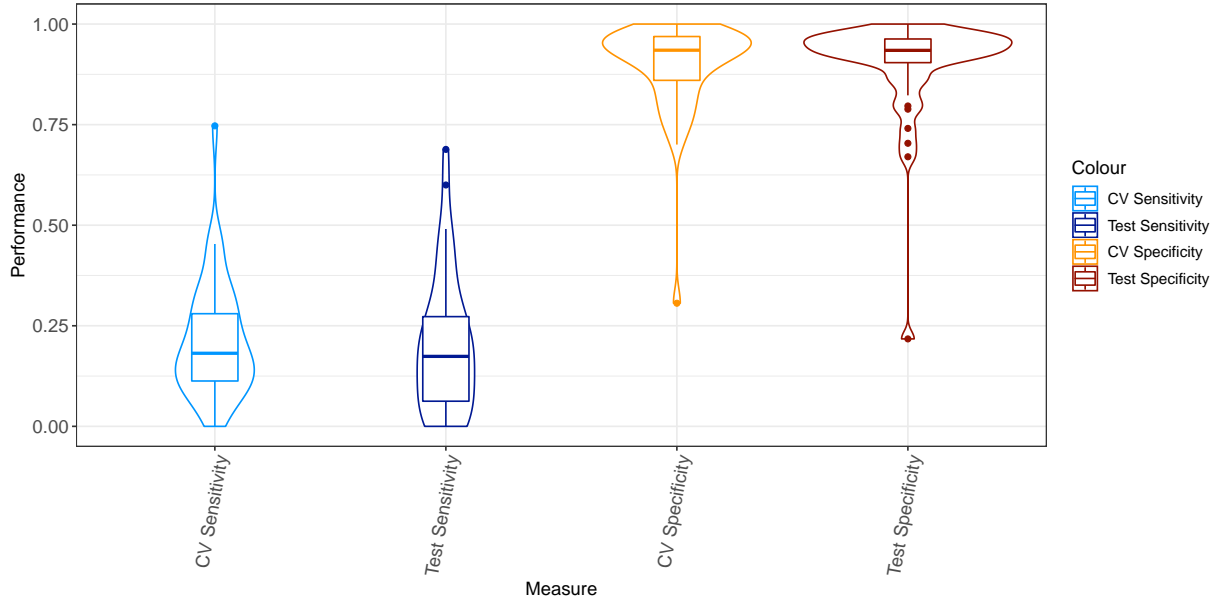

Figure 7: This figure depicts the averaged statistical performance of the best KNN model in Setting 1 for all 41 drugs using sensitivity as selection criterion.

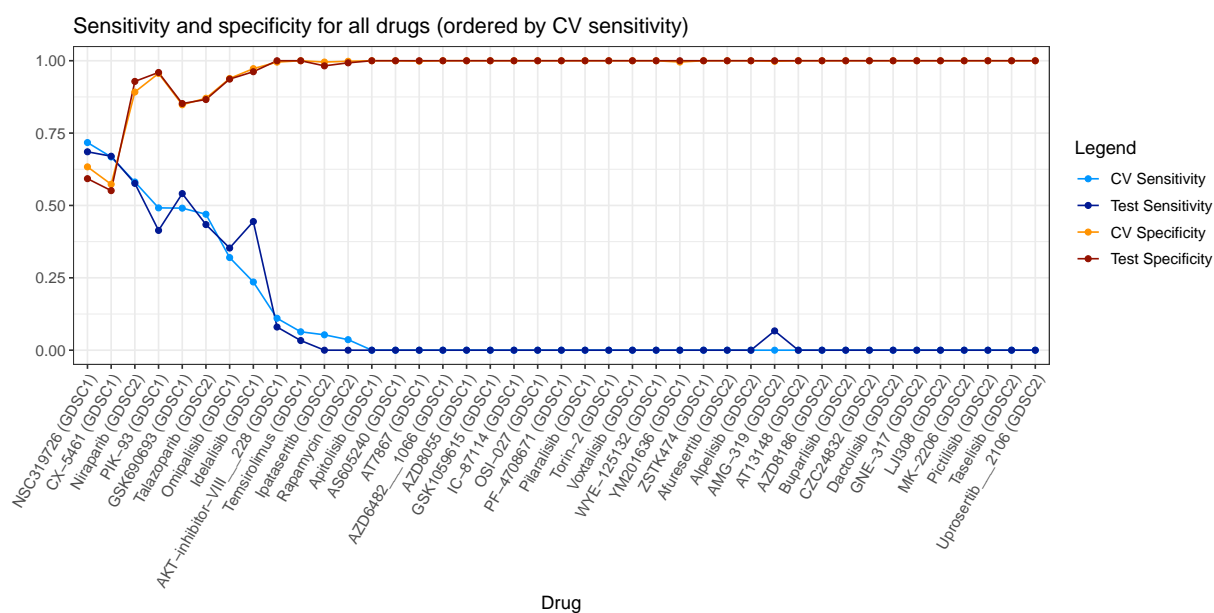

Figure 8: This figure depicts the statistical performance of the best RF model in Setting 1 for all 41 drugs using the ROC as selection criterion.

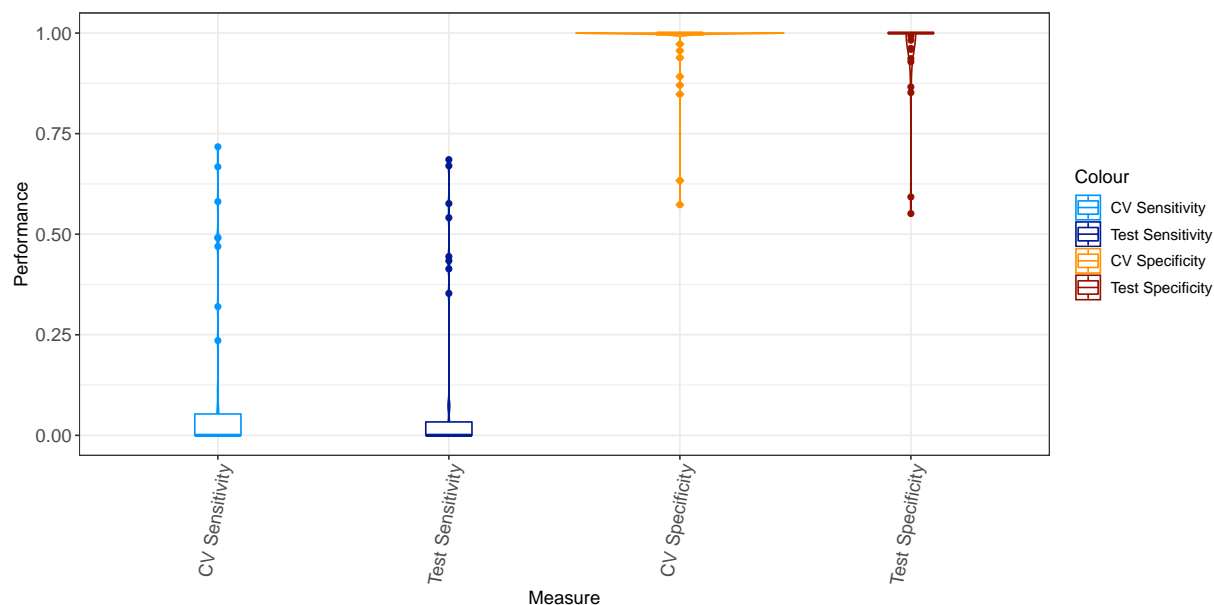

Figure 9: This figure depicts the averaged statistical performance of the best RF model in Setting 1 for all 41 drugs using the ROC as selection criterion.

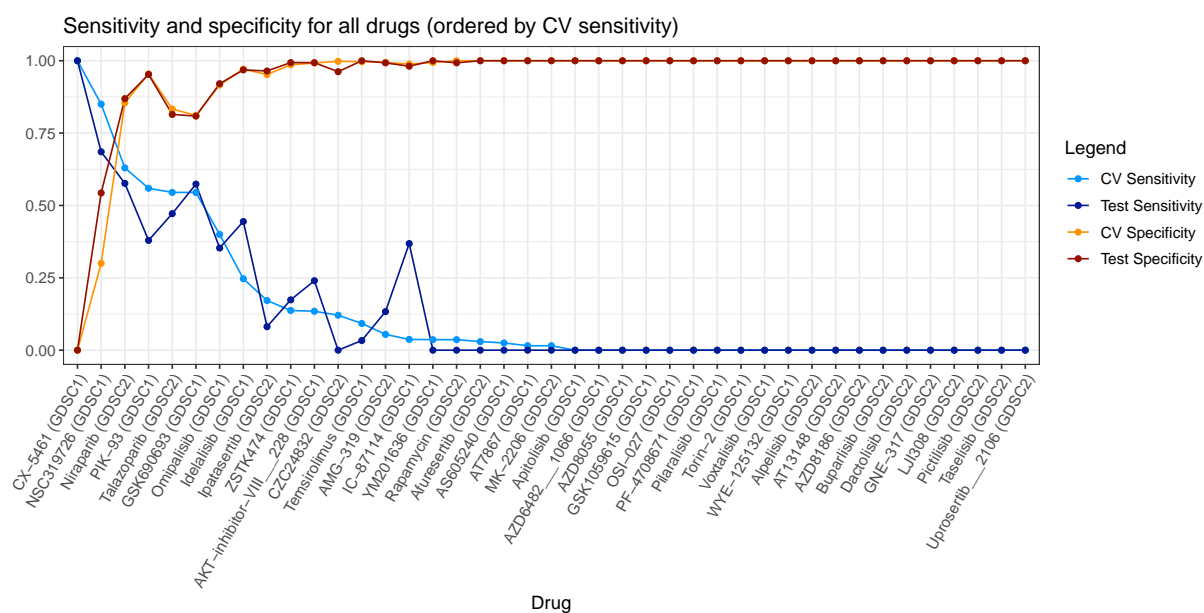

Figure 10: This figure depicts the statistical performance of the best RF model in Setting 1 for all 41 drugs using sensitivity as selection criterion.

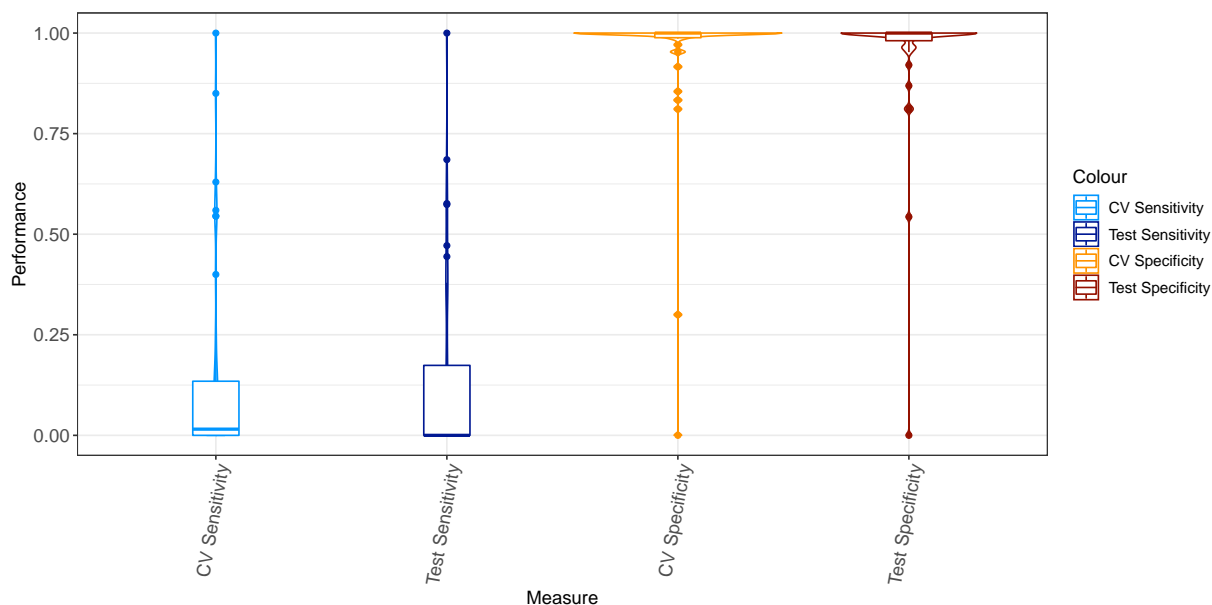

Figure 11: This figure depicts the averaged statistical performance of the best RF model in Setting 1 for all 41 drugs using sensitivity as selection criterion.

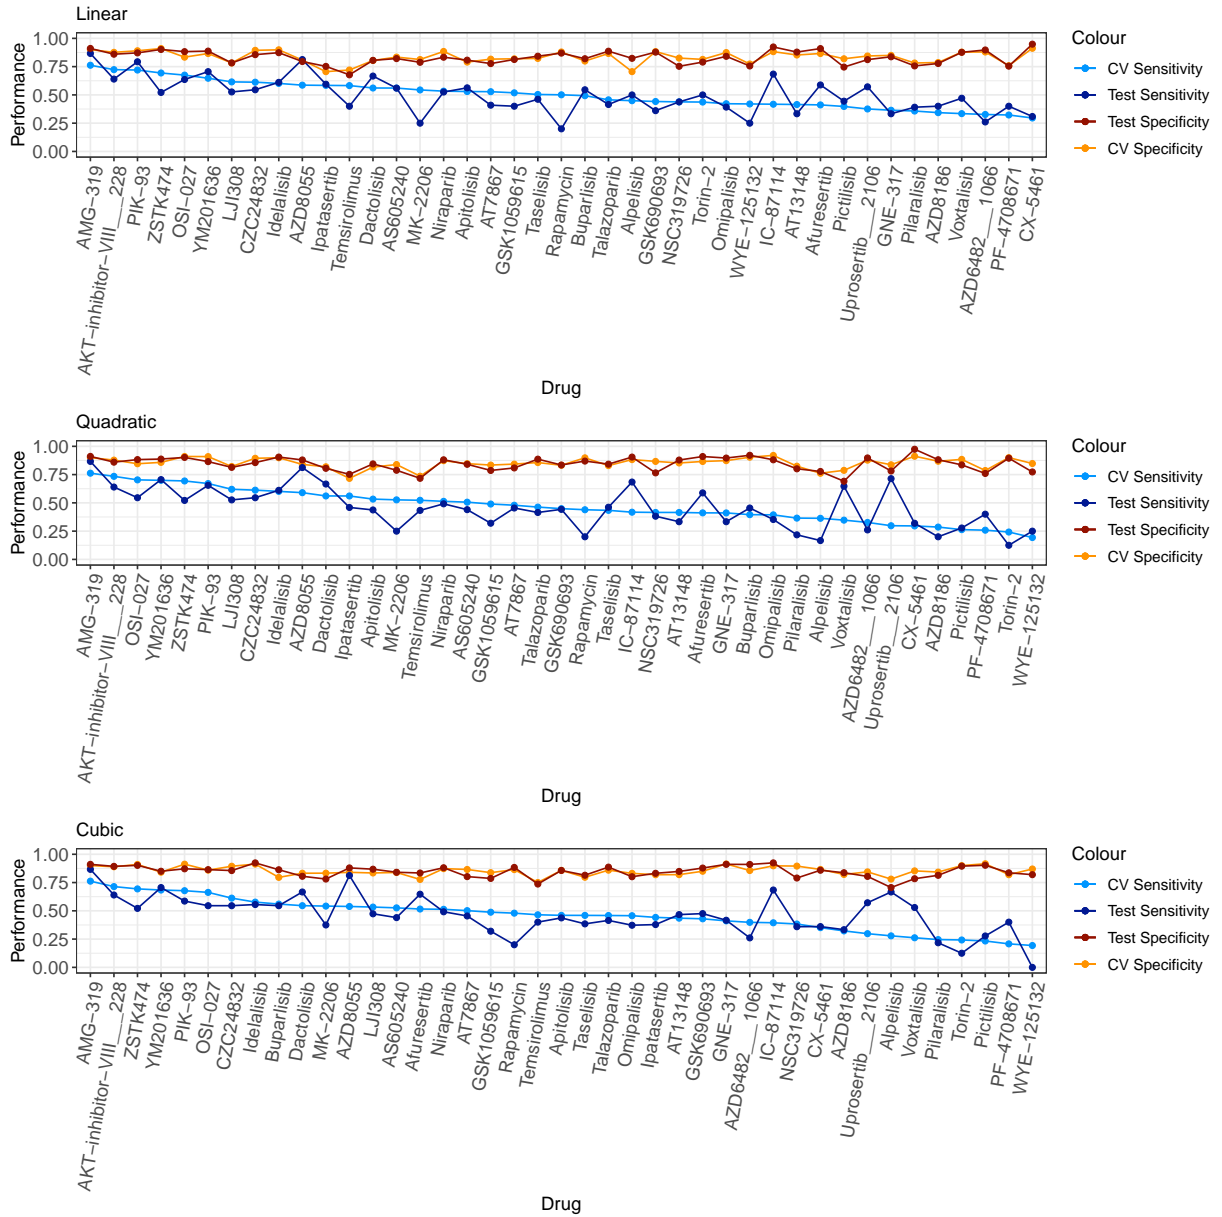

Figure 12: This figure depicts the statistical performance of the best MERIDA model in Setting 1 for all 41 drugs using the three different weight functions.

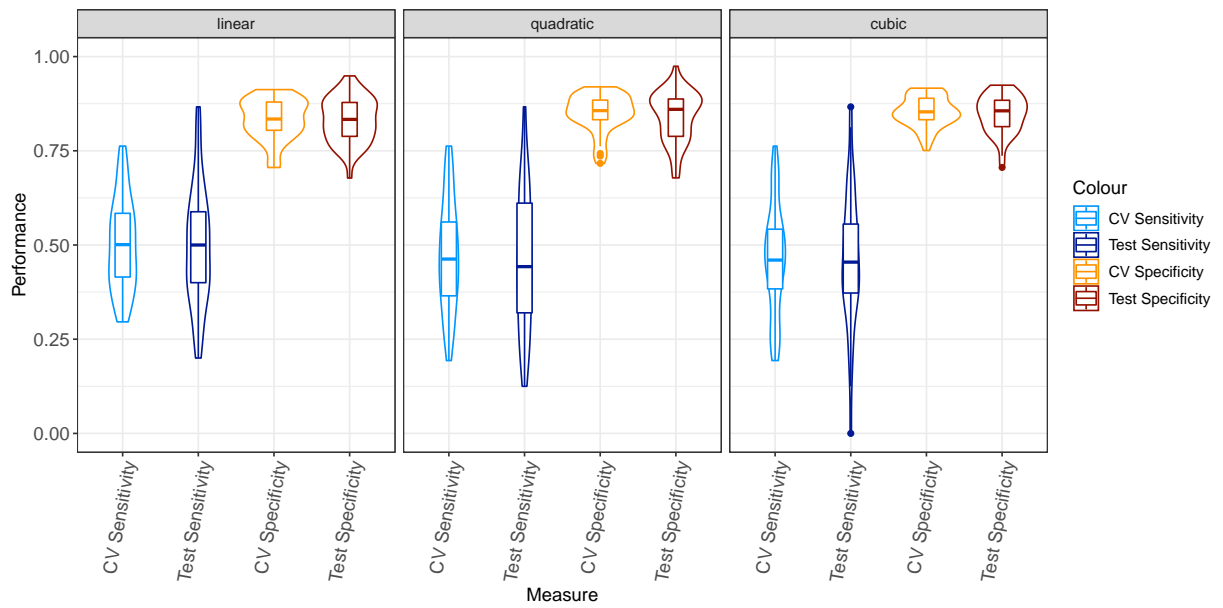

Figure 13: This figure depicts the averaged statistical performance of the best MERIDA model in Setting 1 for all 41 drugs using the three different weight functions.

## 4 Tissue/site specific analysis

The main analysis presented in the manuscript focuses on the full pan-cancer data set from the GDSC. However, it is well-known that tissue plays a significant role in drug sensitivity and resistance. Therefore, we also applied our method to two interesting sub-groups of cell lines: haematological cancer cell lines and non-haematological cancer cell lines. In the following, we will first explain how we prepared the data. Then, we shortly present the results with respect to statistical performance and selected biomarkers.

### 4.1 Data preparation

In general, the performance of statistical learning methods strongly depends on the number of available samples in comparison to the number of available features. As already discussed in the main manuscript, feature selection or dimension reduction steps are therefore indispensable in this field of bioinformatics. When subdividing the pan-cancer data set into single tissues, most of them will be too small to be analyzed. Therefore, we decided to investigate two groups of cell lines that still have a considerable amount of samples that we determined as described in the following.

When observing the tissue distribution of cell lines across the drug responses of the different drugs, we noted that one particular group of cell lines, the haematological cancer cell lines (i.e. leukemia, lymphoma, and myeloma), is often found to be very sensitive to drugs (cf. Figure 14 and 15 for mTOR pathway inhibitors and Figure 43 and 44 for all drugs). We then use this group containing approximately 160 cell lines per drug and the group of the non-haematological cancer cell lines containing approximately 700 cell lines per drug for further analysis.

We prepared the data sets exactly as described in the main manuscript and Supplement S1. This means that we first divided the available cell lines into the two aforementioned groups and then performed the preparation of the data sets including literature-based feature selection and annotation. We also analyzed these two groups in the first two of the three settings from the main manuscript:

- Setting 1: the a priori knowledge is not included, i.e. the matrix without a priori knowledge is used
- Setting 2: the information about the sensitivity biomarkers is integrated in the input feature matrix as one specific composite feature (cf. Section 2.2. in the main manuscript) and the value of the corresponding ILP feature variable is fixed to 1

### 4.2 Results

Figures 16 to 23 show the statistical performance for MERIDA on the 41 different drugs for the non-haematological and haematological cell lines. For Setting 1, it can be seen that both specificity and sensitivity are highest for the pan-cancer analysis (cf. 12 and lowest for the haematological cancer analysis. This effect could generally be attributed to the fact that fewer cell lines are used in both, the haematological cancer analysis and

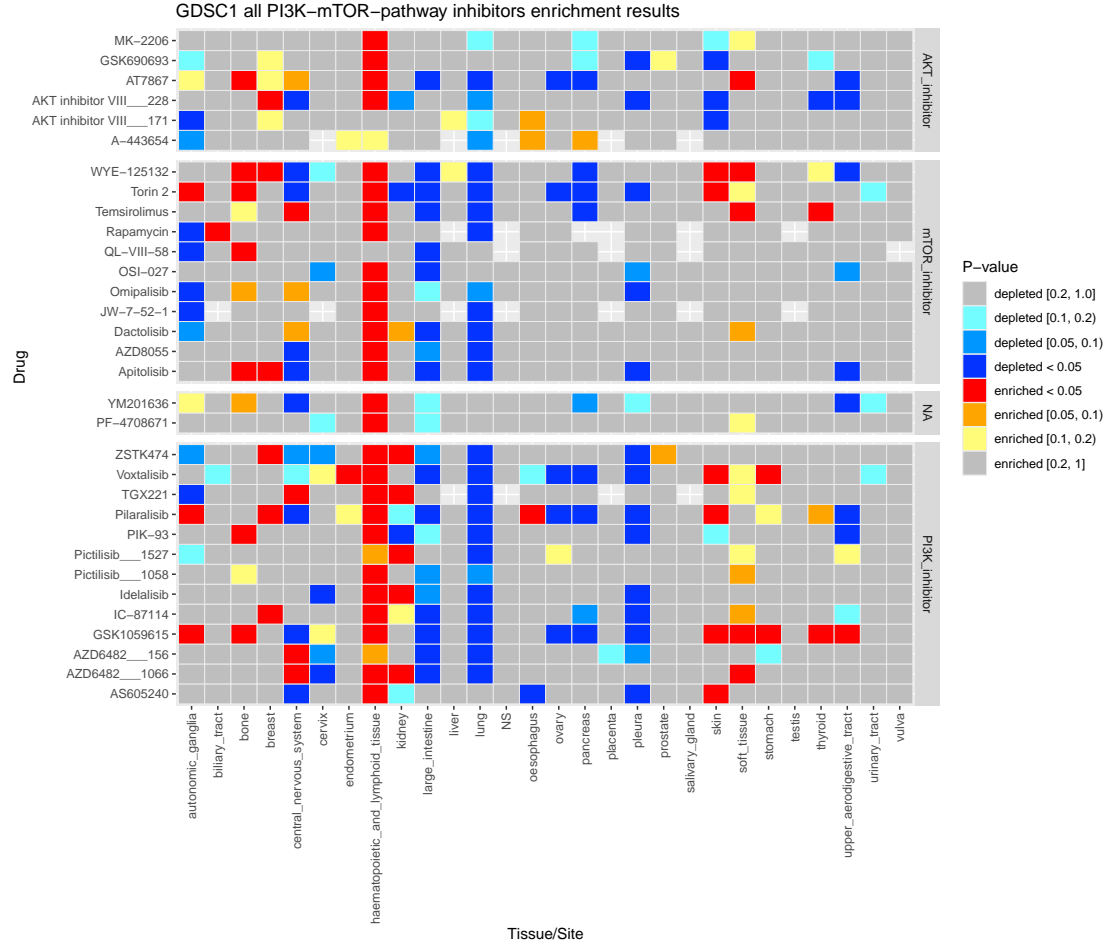

Figure 14: This figure shows the results of an enrichment analysis for the different tissues/sites available in the GDSC database for the mTOR pathway inhibitors in GDSC1. The enrichment analysis was conducted using the respective site as category, and the increasingly sorted logarithmized IC50 lists as ranked lists. The p-values were adjusted using the Benjamini-Yekutieli procedure.

the non-haematological cancer analysis in comparison to the pan-cancer analysis. For Setting 2, it can be noted that the a priori knowledge seems to be more favourable for the pan-cancer cell lines and the non-haematological cancer cell lines in terms of statistical sensitivity, which might indicate that the drug sensitivity of the haematological cancer cell lines is less determined by the used biomarkers.

We also analyzed the importance of the tissue in the resulting models. From our results for Setting 1, we can clearly see that the selected biomarkers from the non-haematological cancer group largely resemble those from the analysis using all cell lines (cf. Figure 24 to 27). There is still some intersection of the selected biomarkers for the haematological cancer cell lines with the biomarkers for some of the drugs (cf. Figure 28 and 29 and

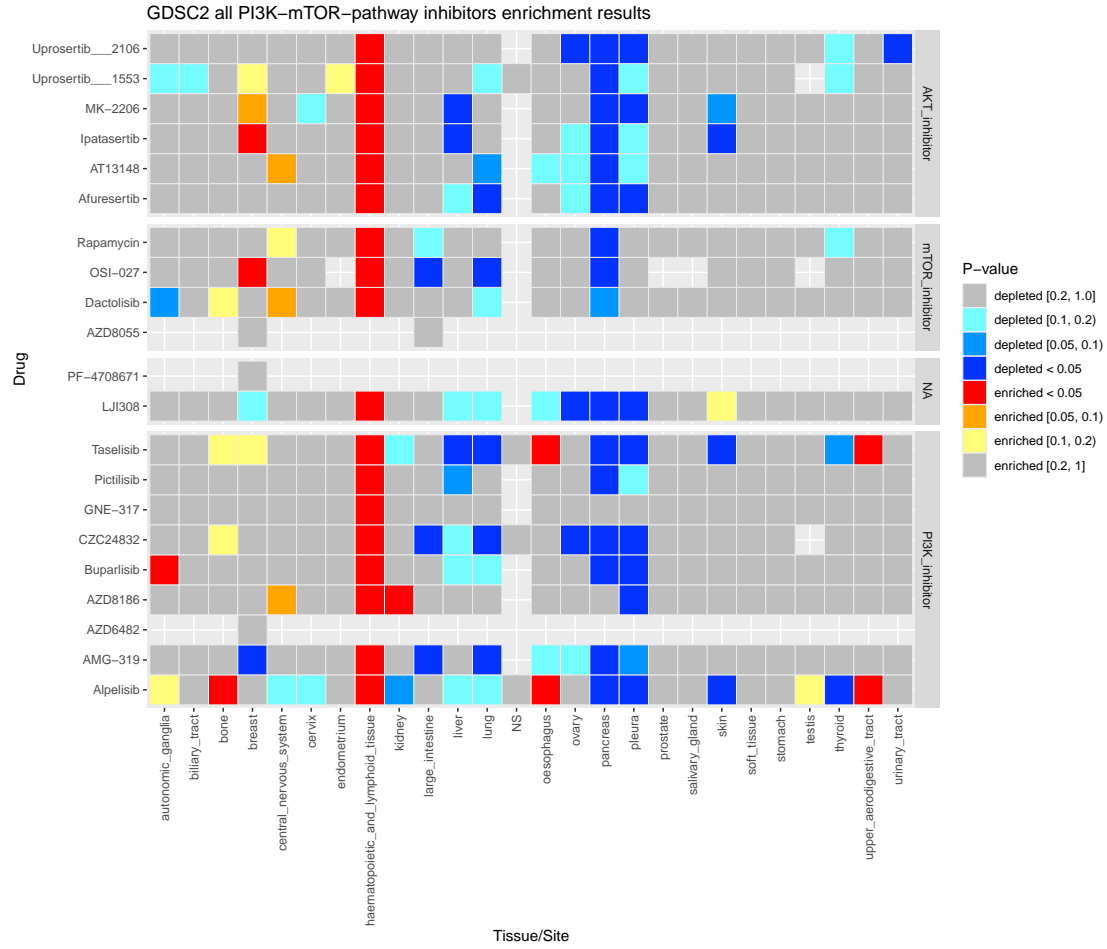

Figure 15: In analogy to Figure 14, this figure shows the results of an enrichment analysis for the different tissues/sites available in the GDSC database for the mTOR pathway inhibitors in GDSC2. The enrichment analysis was conducted using the respective site as category, and the sorted IC<sub>50</sub> lists as ranked lists. The p-values were adjusted using the Benjamini-Yekutieli procedure.

Table 11 to Table 13). However, the relationship is much less pronounced highlighting the need for tissue-specific models. The smallest overlap can be observed for the features from the haematological cancer cell lines with the features from the non-haematological cancer cell lines.

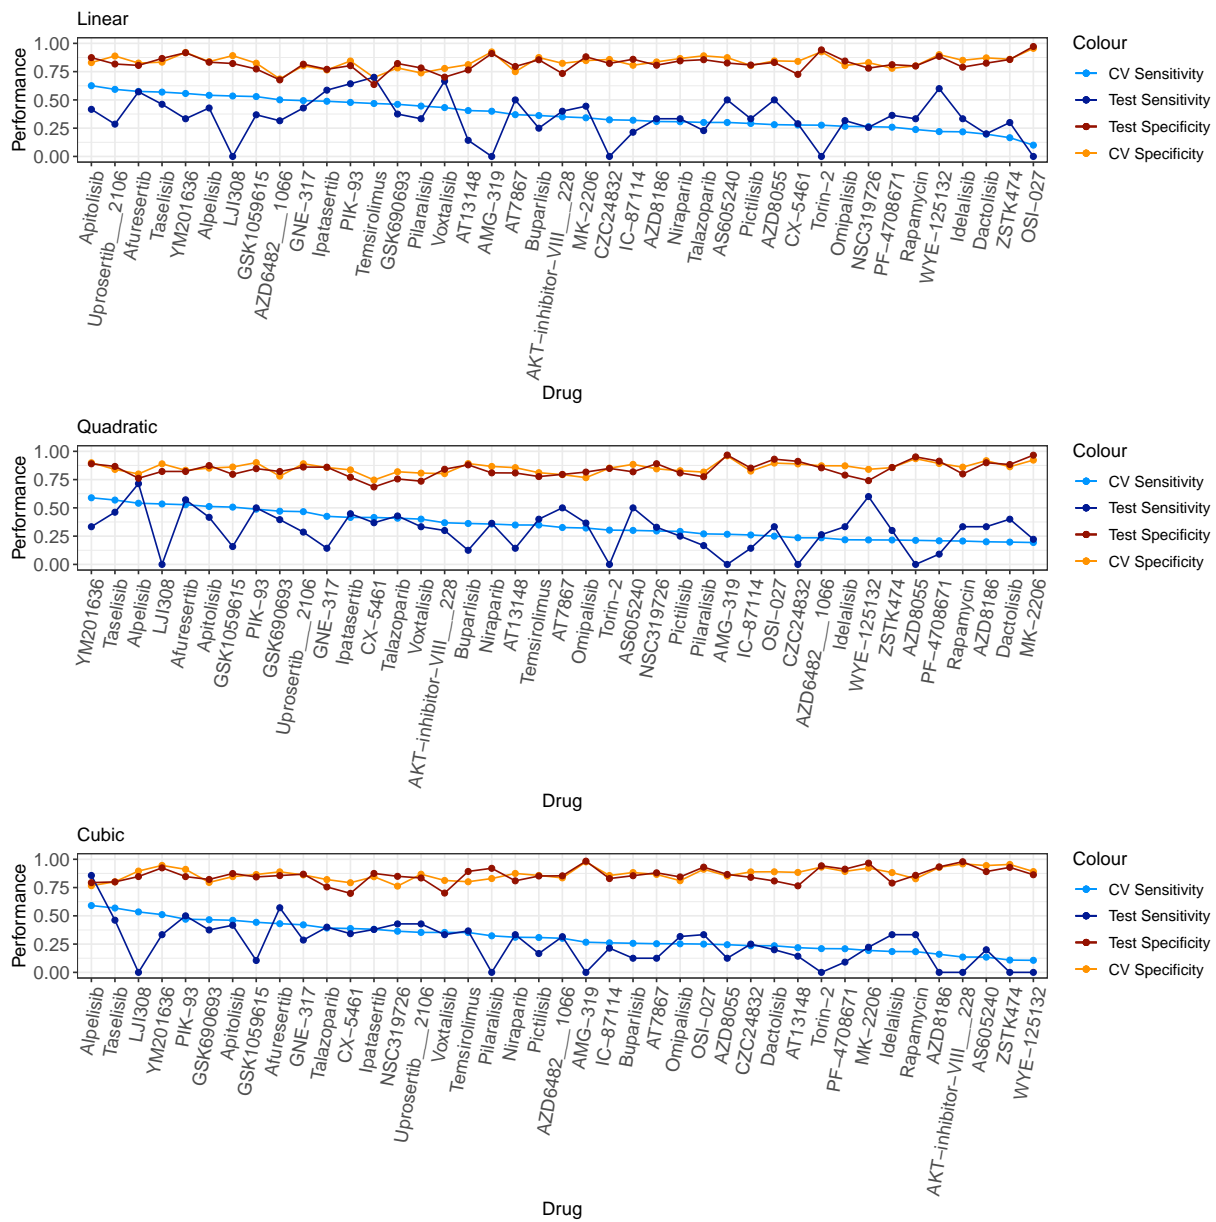

Figure 16: This figure depicts the statistical performance of the best MERIDA model in Setting 1 for all 41 drugs for the non-haematological cell lines.

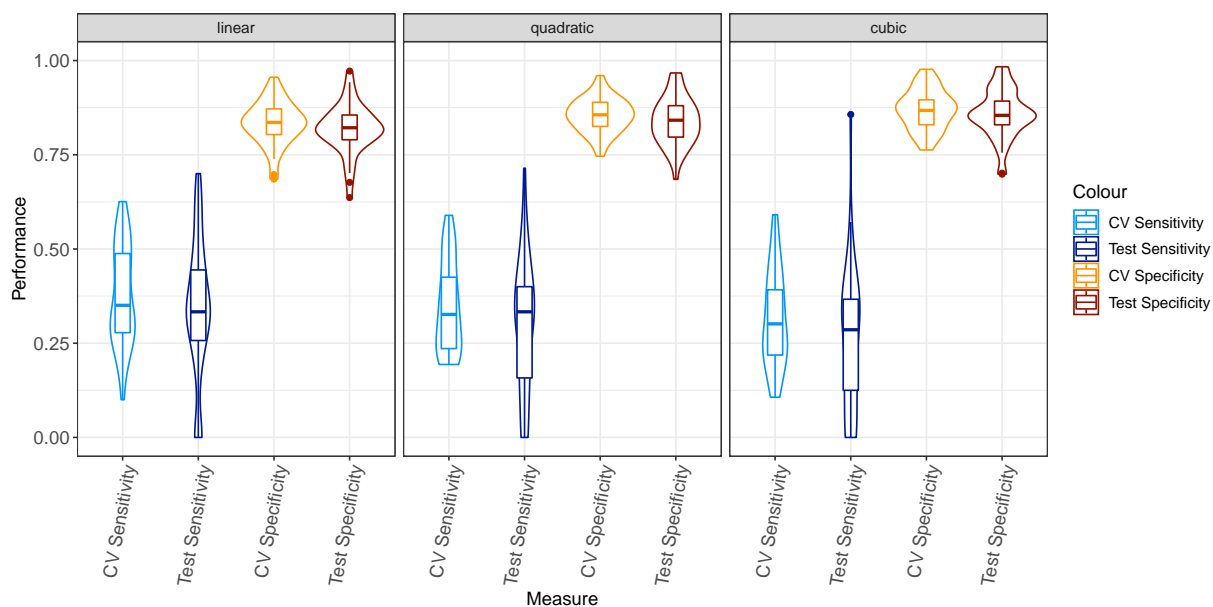

Figure 17: This figure depicts the averaged statistical performance of the best MERIDA model in Setting 1 for all 41 drugs for the non-haematological cell lines.

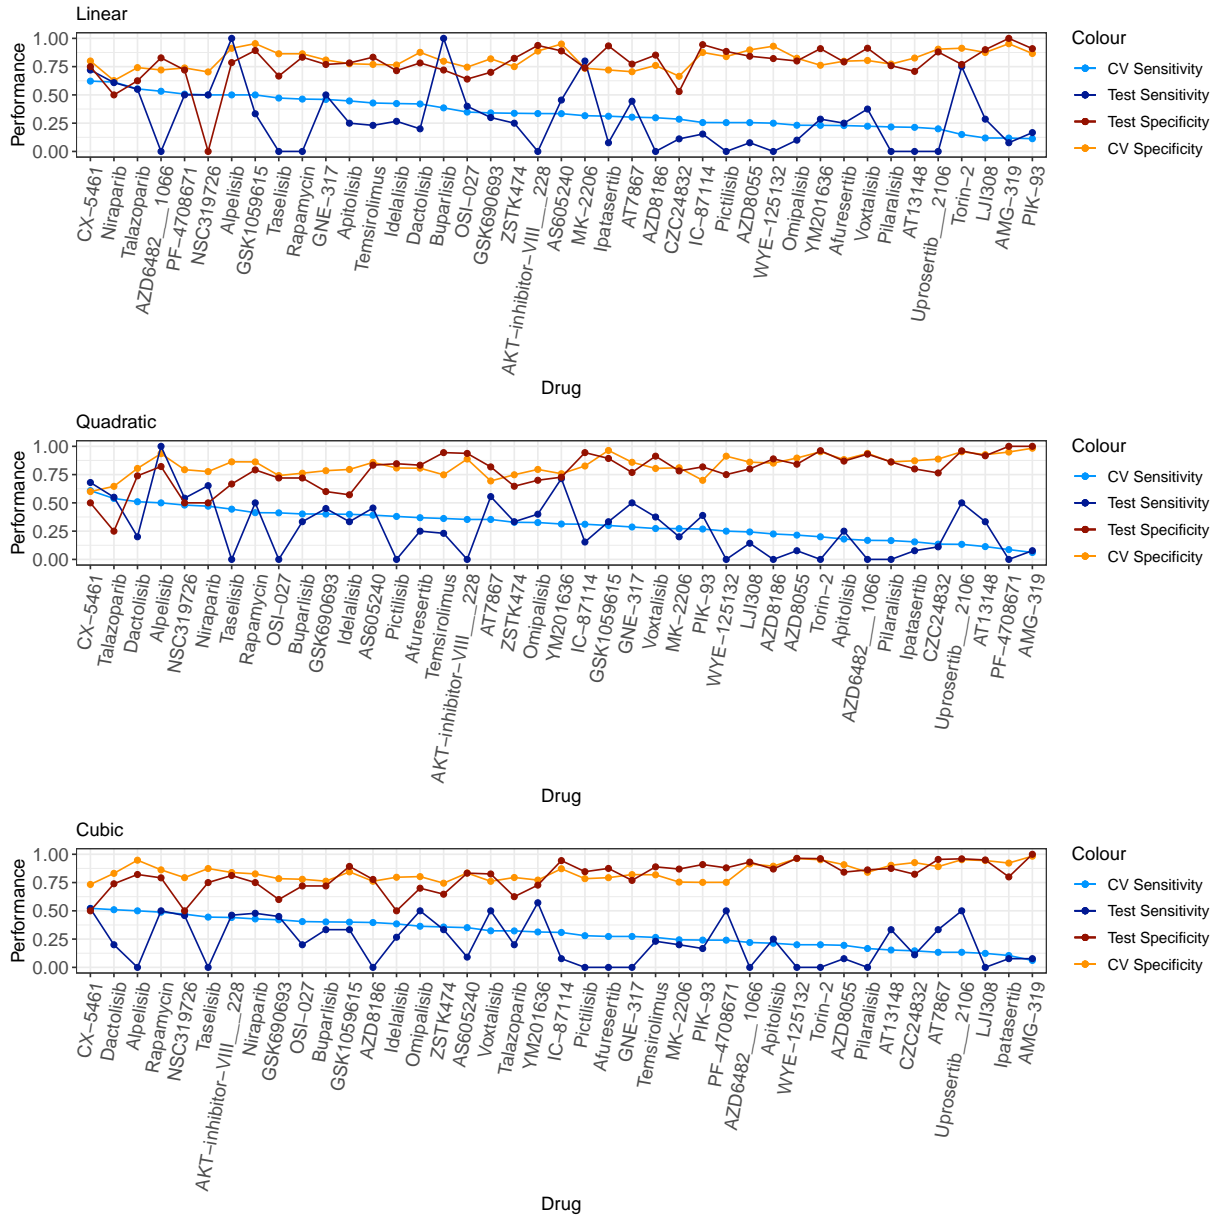

Figure 18: This figure depicts the statistical performance of the best MERIDA model in Setting 1 for all 41 drugs for the haematological cell lines.

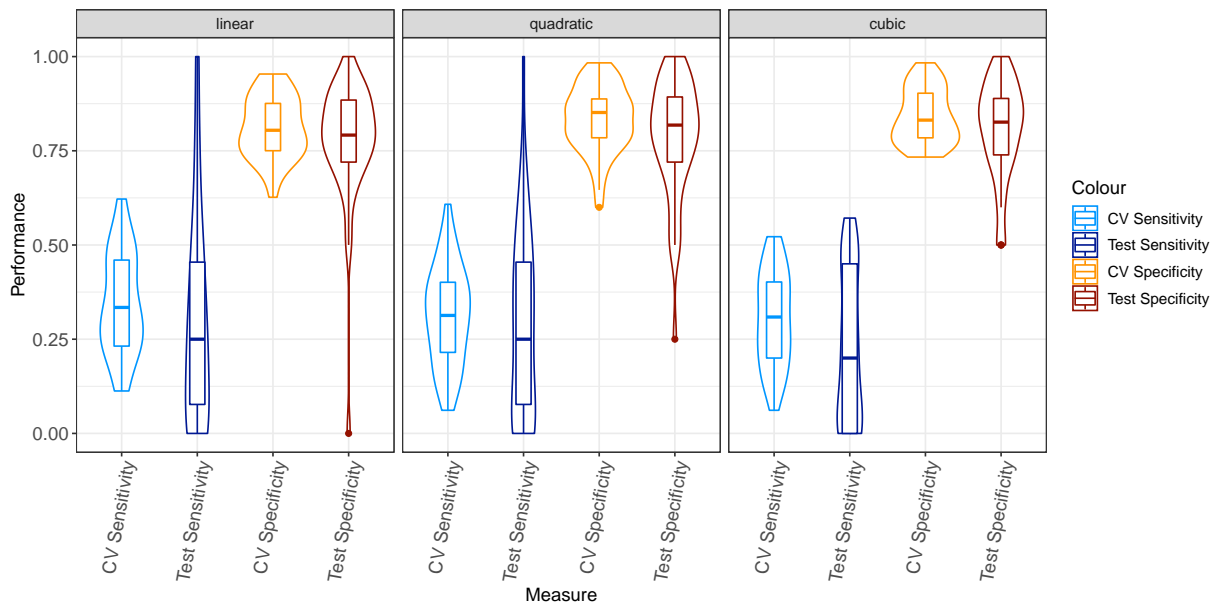

Figure 19: This figure depicts the averaged statistical performance of the best MERIDA model in Setting 1 for all 41 drugs for the haematological cell lines.

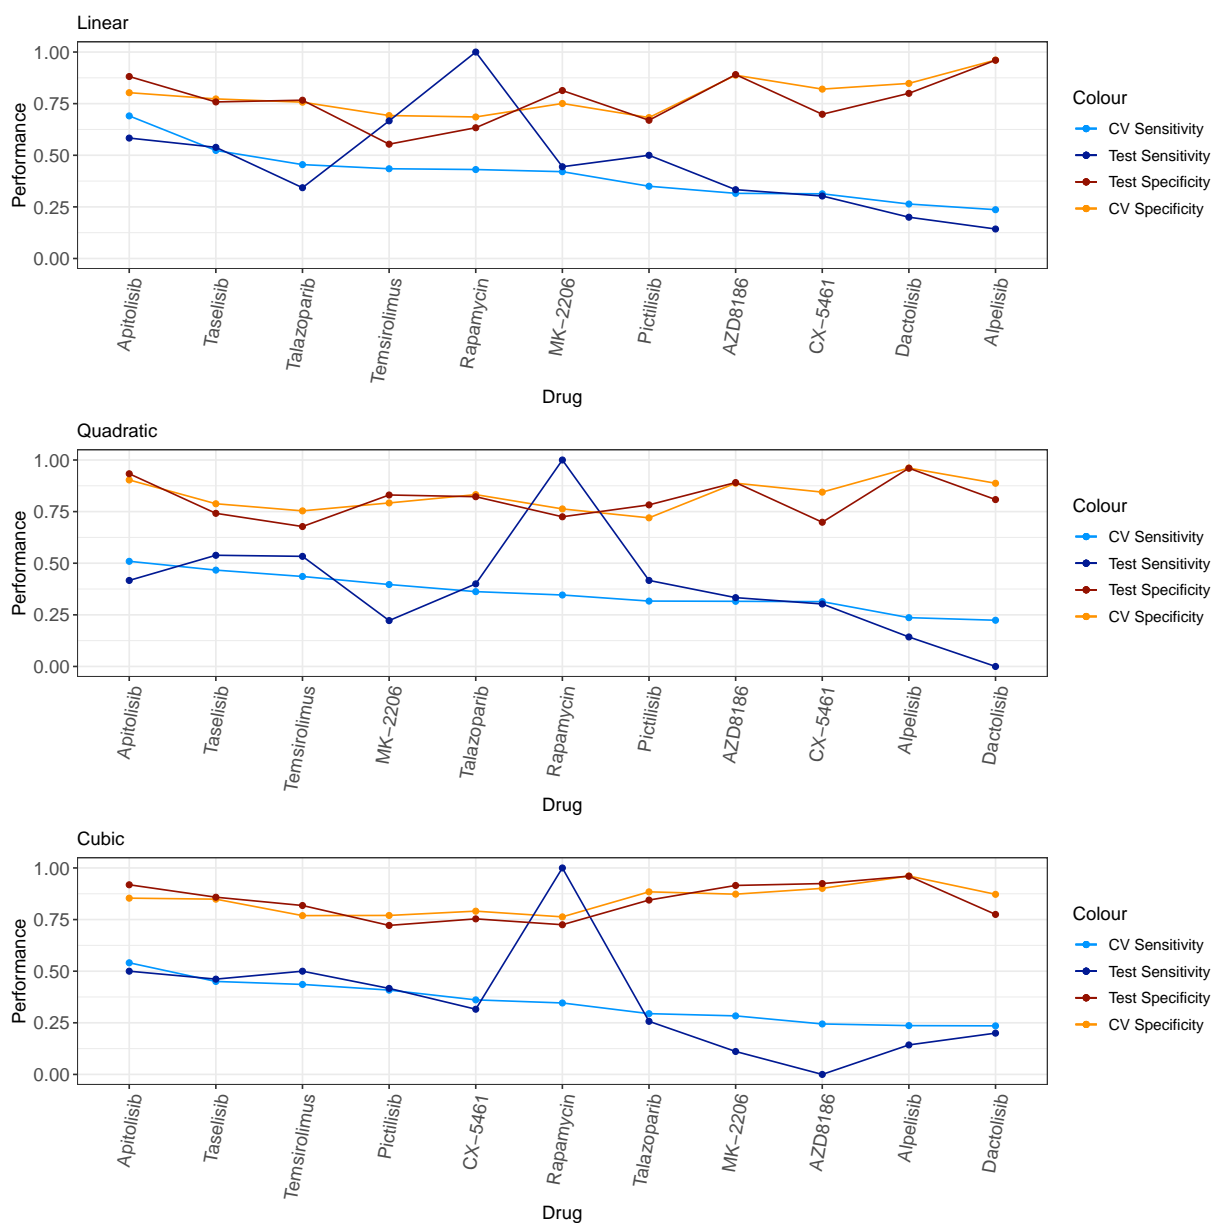

Figure 20: This figure depicts the statistical performance of the best MERIDA model in Setting 2 for non-haematological cell lines.

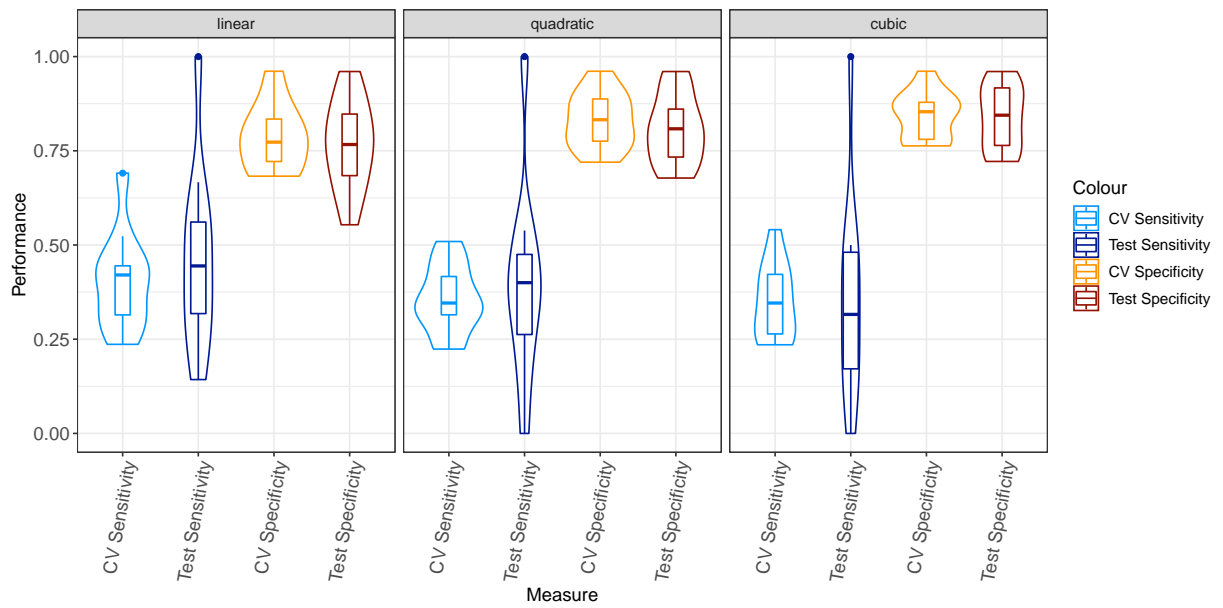

Figure 21: This figure depicts the averaged statistical performance of the best MERIDA model in Setting 2 for non-haematological cell lines.

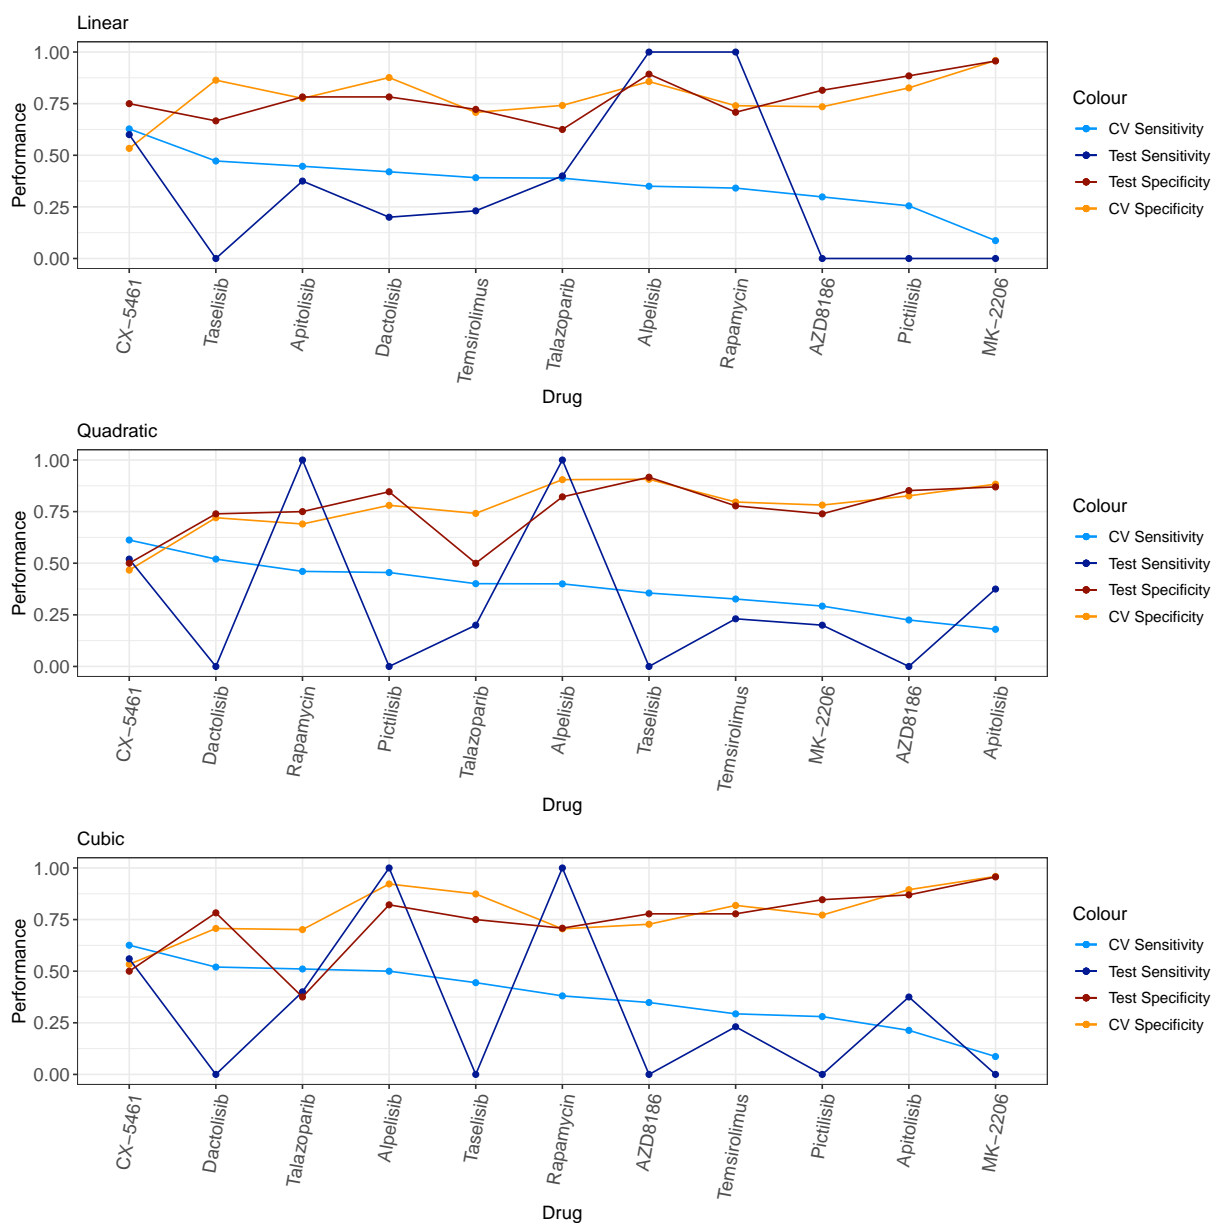

Figure 22: This figure depicts the statistical performance of the best MERIDA model in Setting 2 for haematological cell lines.

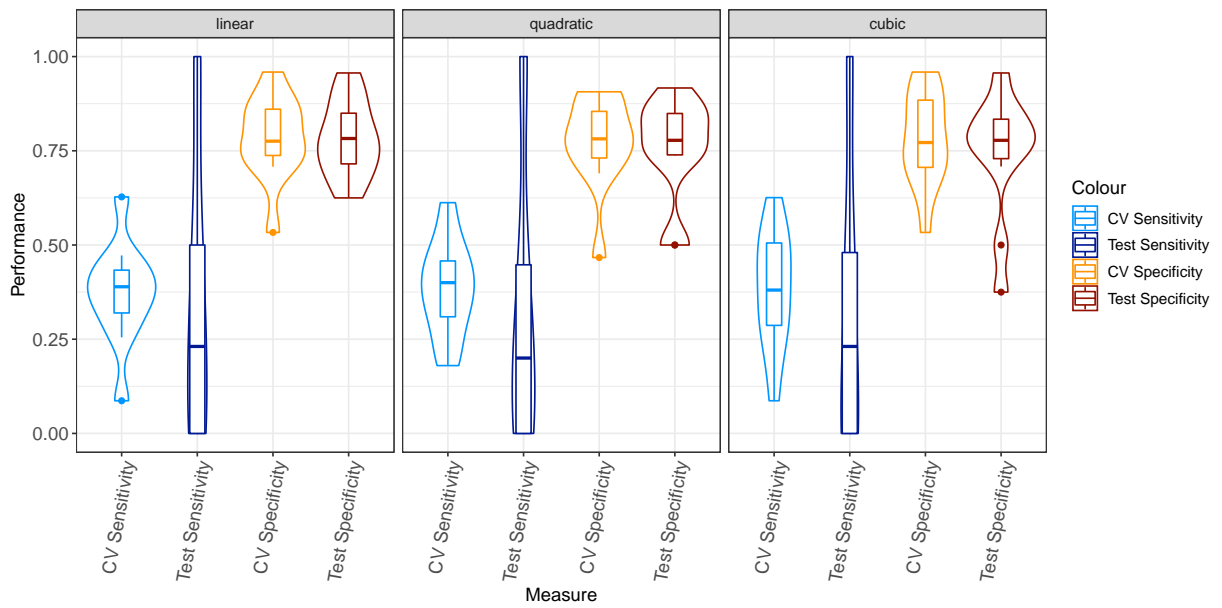

Figure 23: This figure depicts the averaged statistical performance of the best MERIDA model in Setting 2 for the haematological cell lines.

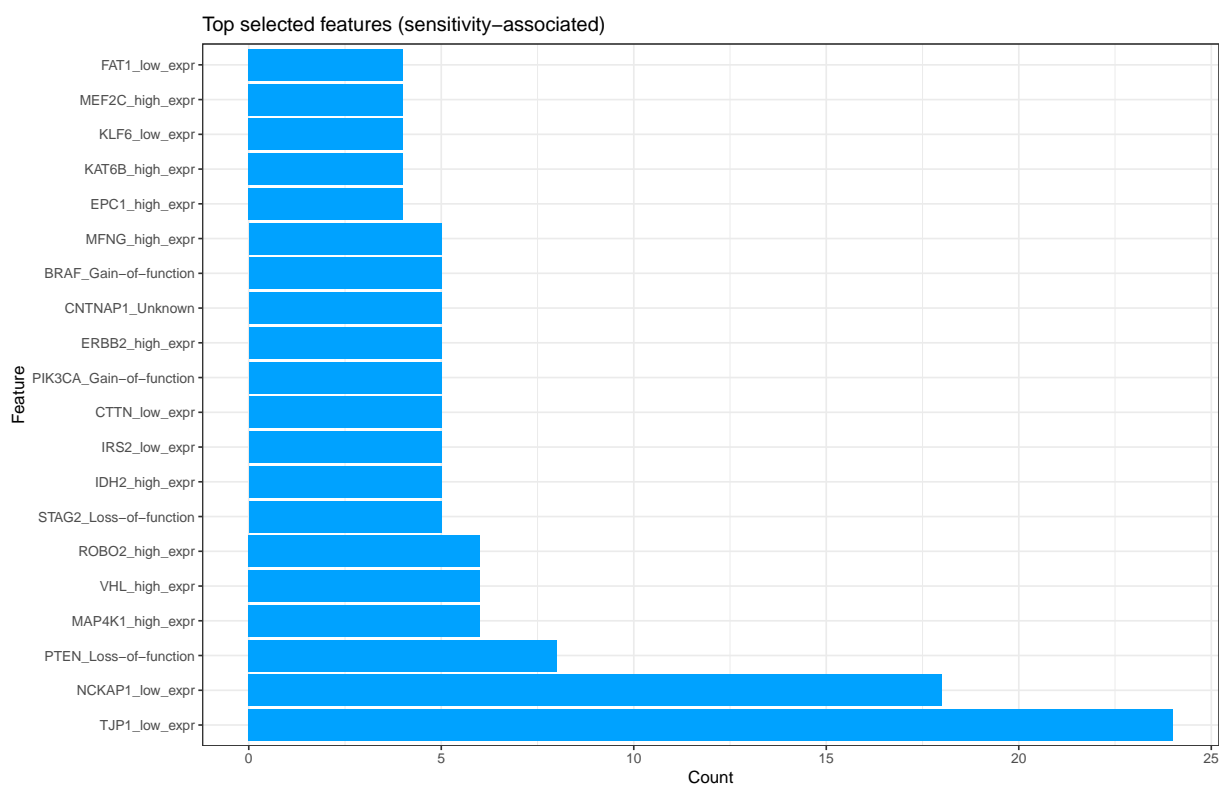

Figure 24: This figure depicts the the frequency of the top 20 selected sensitivity-associated features (using all models of size 1 to 6 per drug) across all mTOR pathway inhibitors (37) for Setting 1 in the pan-cancer analysis.

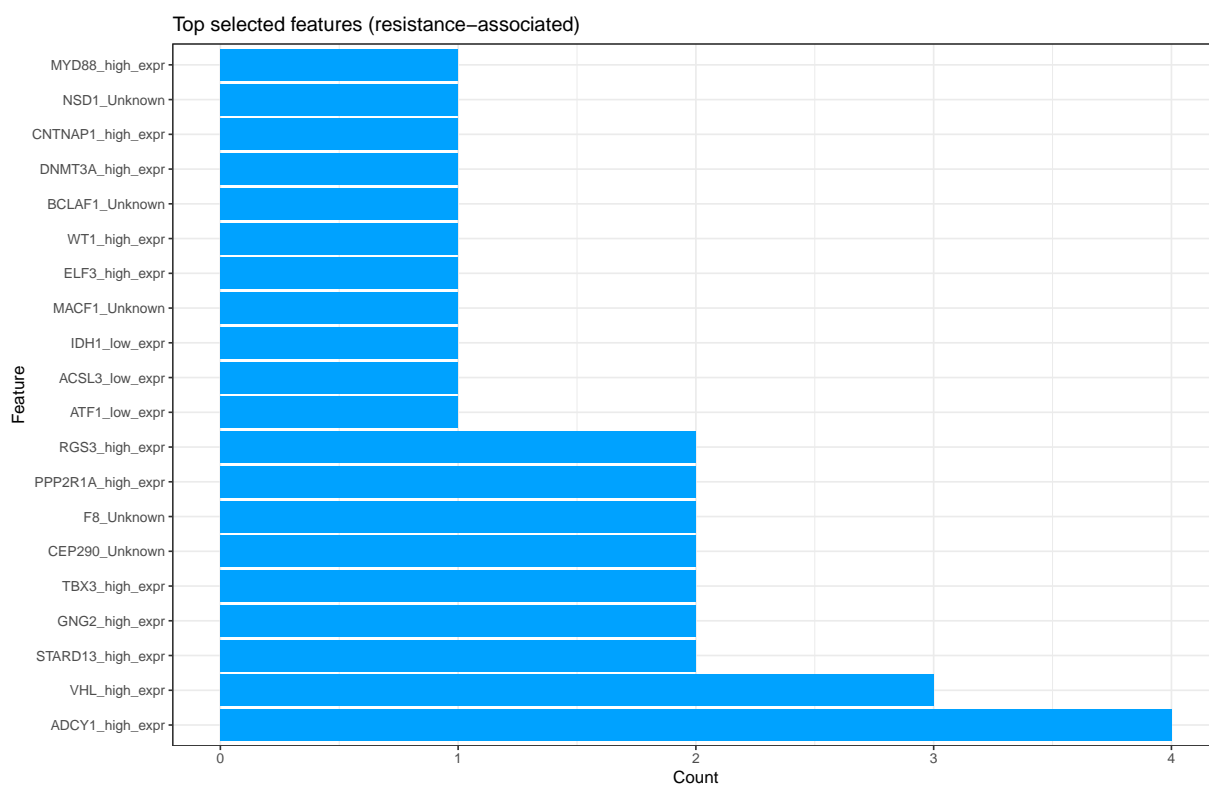

Figure 25: This figure depicts the the frequency of the top 20 selected resistance-associated features (using all models of size 1 to 6 per drug) across all mTOR pathway inhibitors (37) for Setting 1 in the pan-cancer analysis.

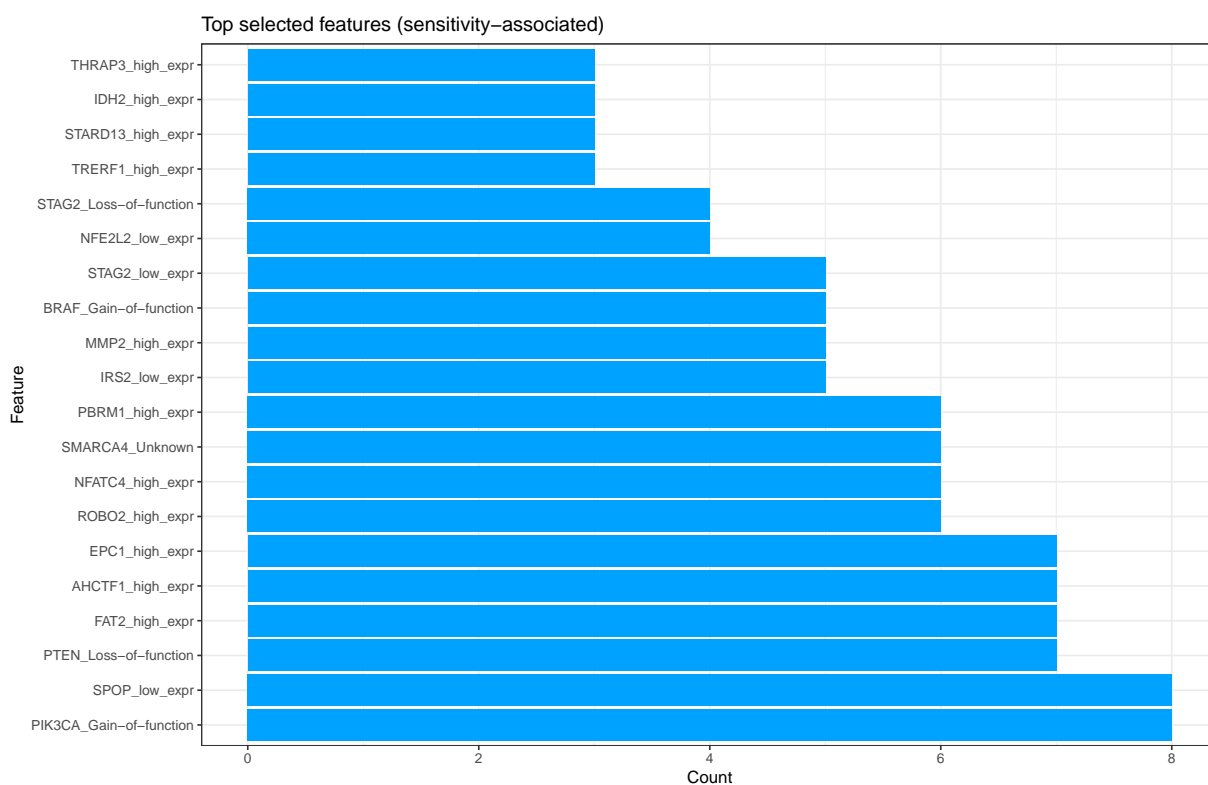

Figure 26: This figure depicts the the frequency of the top 20 selected sensitivity-associated features (using all models of size 1 to 6 per drug) across all mTOR pathway inhibitors (37) for Setting 1 for the non-haematological cancer cell lines.

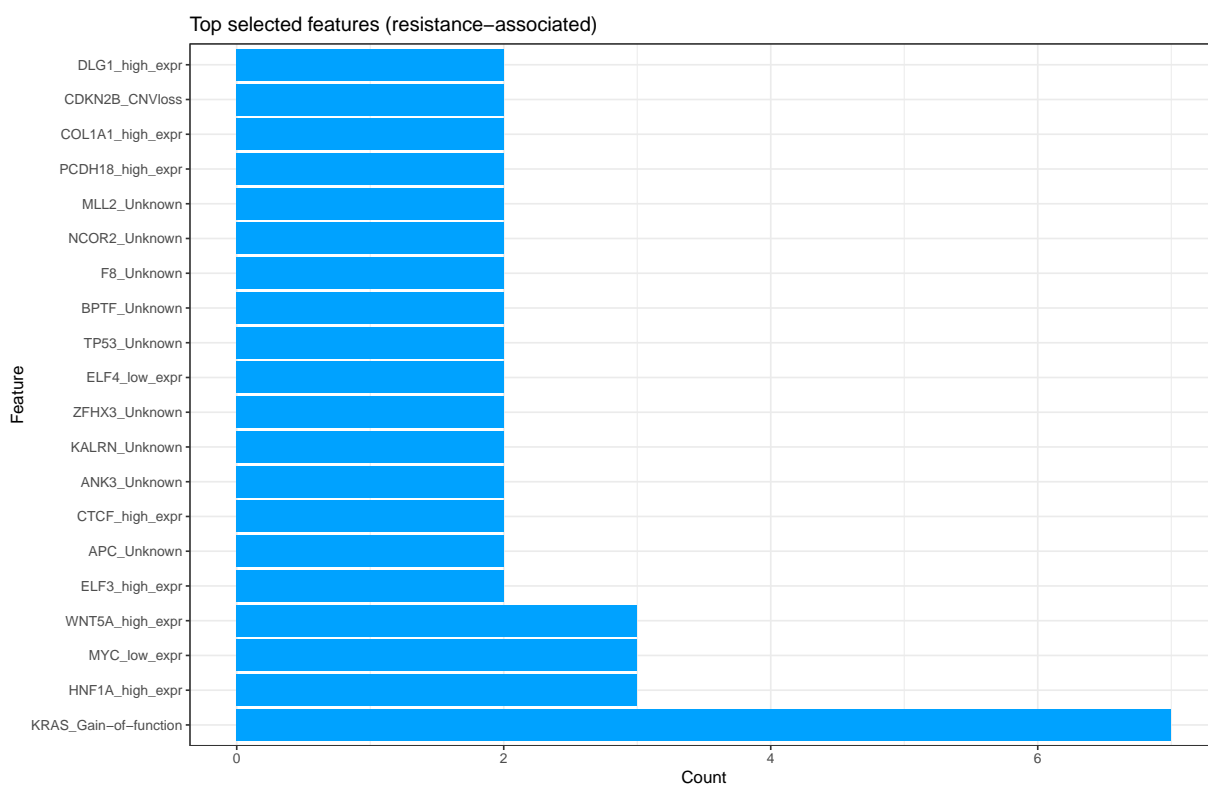

Figure 27: This figure depicts the the frequency of the top 20 selected resistance-associated features (using all models of size 1 to 6 per drug) across all mTOR pathway inhibitors (37) for Setting 1 for the non-haematological cancer cell lines.

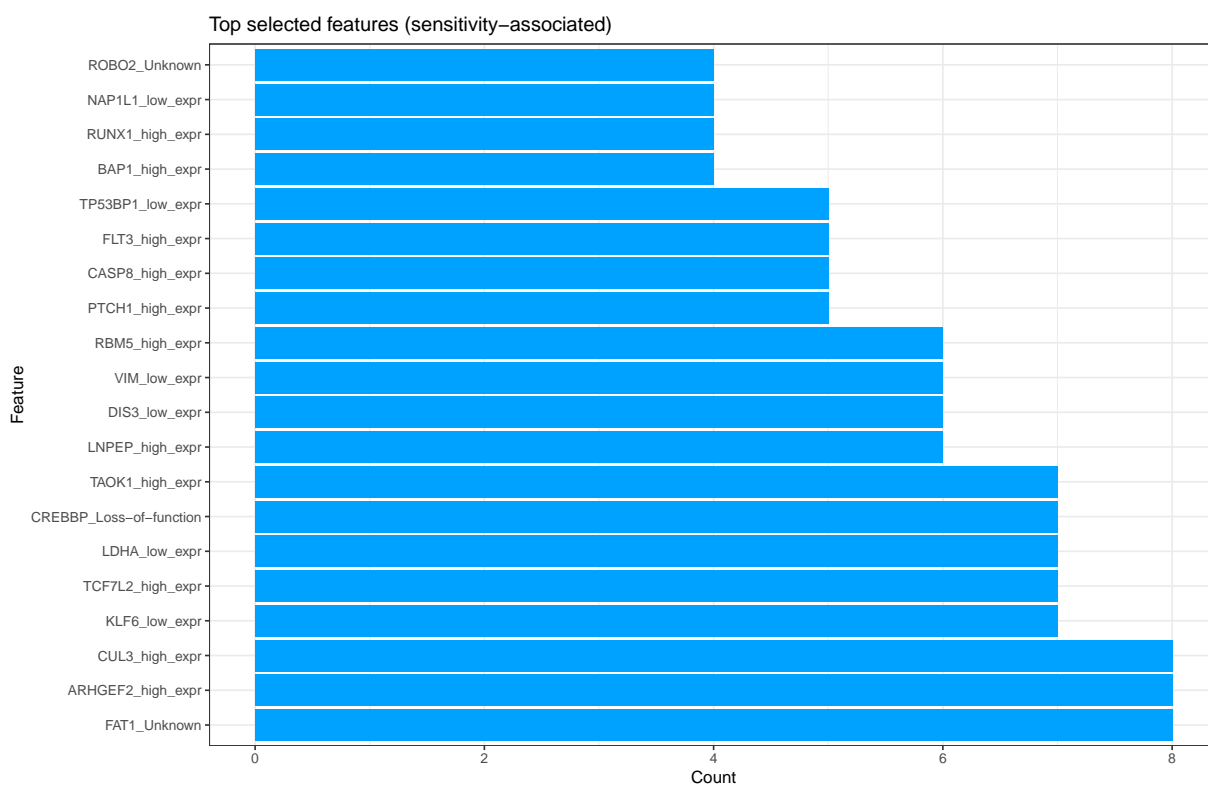

Figure 28: This figure depicts the the frequency of the top 20 selected sensitivity-associated features (using all models of size 1 to 6 per drug) across all mTOR pathway inhibitors (37) for Setting 1 for the haematological cancer cell lines.

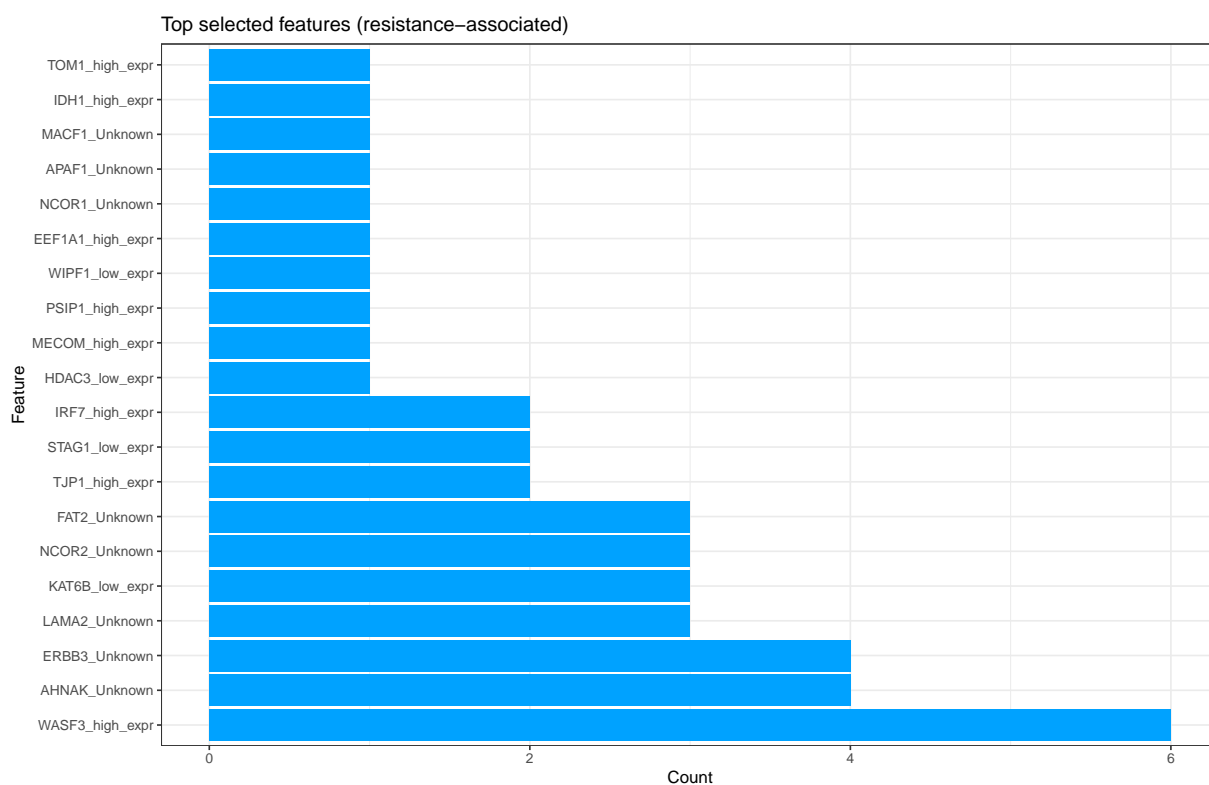

Figure 29: This figure depicts the the frequency of the top 20 selected resistance-associated features (using all models of size 1 to 6 per drug) across all mTOR pathway inhibitors (37) for Setting 1 for the haematological cancer cell lines.

Table 11: Intersection of selected features between non-haematological cell lines and all cell lines

| Drug                     | Database | Setting | P-value (Fisher's exact test) |
|--------------------------|----------|---------|-------------------------------|
| Afuresertib              | GDSC2    | 1       | 3.85E-07                      |
| AKT-inhibitor-VIII___228 | GDSC1    | 1       | 1                             |
| Alpelisib                | GDSC2    | 1       | 2.40E-06                      |
| AMG-319                  | GDSC2    | 1       | 6.15E-07                      |
| Apitolisib               | GDSC1    | 1       | 2.90E-05                      |
| AS605240                 | GDSC1    | 1       | 8.01E-05                      |
| AT13148                  | GDSC2    | 1       | 3.21E-03                      |
| AT7867                   | GDSC1    | 1       | 6.58E-06                      |
| AZD6482___1066           | GDSC1    | 1       | 8.60E-03                      |
| AZD8055                  | GDSC1    | 1       | 2.79E-04                      |
| AZD8186                  | GDSC2    | 1       | 1.62E-04                      |
| Buparlisib               | GDSC2    | 1       | 6.55E-07                      |
| CX-5461                  | GDSC1    | 1       | 1.64E-03                      |
| CZC24832                 | GDSC2    | 1       | 2.35E-01                      |
| Dactolisib               | GDSC2    | 1       | 4.94E-07                      |
| GNE-317                  | GDSC2    | 1       | 7.93E-05                      |
| GSK1059615               | GDSC1    | 1       | 5.47E-08                      |
| GSK690693                | GDSC1    | 1       | 2.93E-07                      |
| IC-87114                 | GDSC1    | 1       | 2.27E-01                      |
| Idelalisib               | GDSC1    | 1       | 5.11E-02                      |
| Ipatasertib              | GDSC2    | 1       | 1.74E-08                      |
| LJI308                   | GDSC2    | 1       | 6.53E-03                      |
| MK-2206                  | GDSC2    | 1       | 1.18E-02                      |
| Niraparib                | GDSC2    | 1       | 5.07E-03                      |
| NSC319726                | GDSC1    | 1       | 2.75E-12                      |
| Omipalisib               | GDSC1    | 1       | 6.71E-03                      |
| OSI-027                  | GDSC1    | 1       | 5.52E-07                      |
| PF-4708671               | GDSC1    | 1       | 7.27E-08                      |
| Pictilisib               | GDSC2    | 1       | 2.58E-04                      |
| PIK-93                   | GDSC1    | 1       | 1.64E-03                      |
| Pilaralisib              | GDSC1    | 1       | 7.78E-09                      |
| Rapamycin                | GDSC2    | 1       | 1.90E-02                      |
| Talazoparib              | GDSC2    | 1       | 7.41E-06                      |
| Taselisib                | GDSC2    | 1       | 2.28E-11                      |
| Temsirolimus             | GDSC1    | 1       | 8.23E-03                      |
| Torin-2                  | GDSC1    | 1       | 3.66E-07                      |
| Uprosertib___2106        | GDSC2    | 1       | 2.38E-06                      |
| Voxtalisib               | GDSC1    | 1       | 6.98E-06                      |
| WYE-125132               | GDSC1    | 1       | 7.87E-11                      |
| YM201636                 | GDSC1    | 1       | 9.90E-03                      |

|         |       |   |   |
|---------|-------|---|---|
| ZSTK474 | GDSC1 | 1 | 1 |
|---------|-------|---|---|

Table 12: Intersection of selected features between haematological cell lines and all cell lines

| Drug                     | Database | Setting | P-value (Fisher’s exact test) |
|--------------------------|----------|---------|-------------------------------|
| Afuresertib              | GDSC2    | 1       | 1.66E-01                      |
| AKT-inhibitor-VIII___228 | GDSC1    | 1       | 1                             |
| Alpelisib                | GDSC2    | 1       | 1.81E-01                      |
| AMG-319                  | GDSC2    | 1       | 1                             |
| Apitolisib               | GDSC1    | 1       | 1                             |
| AS605240                 | GDSC1    | 1       | 1.92E-01                      |
| AT13148                  | GDSC2    | 1       | 1                             |
| AT7867                   | GDSC1    | 1       | 1.29E-01                      |
| AZD6482___1066           | GDSC1    | 1       | 1                             |
| AZD8055                  | GDSC1    | 1       | 1                             |
| AZD8186                  | GDSC2    | 1       | 2.03E-02                      |
| Buparlisib               | GDSC2    | 1       | 1                             |
| CX-5461                  | GDSC1    | 1       | 1                             |
| CZC24832                 | GDSC2    | 1       | 1.39E-01                      |
| Dactolisib               | GDSC2    | 1       | 1.15E-02                      |
| GNE-317                  | GDSC2    | 1       | 1                             |
| GSK1059615               | GDSC1    | 1       | 1.45E-01                      |
| GSK690693                | GDSC1    | 1       | 1                             |
| IC-87114                 | GDSC1    | 1       | 1                             |
| Idelalisib               | GDSC1    | 1       | 1                             |
| Ipatasertib              | GDSC2    | 1       | 1                             |
| LJI308                   | GDSC2    | 1       | 1                             |
| MK-2206                  | GDSC2    | 1       | 1                             |
| Niraparib                | GDSC2    | 1       | 1                             |
| NSC319726                | GDSC1    | 1       | 1                             |
| Omipalisib               | GDSC1    | 1       | 1                             |
| OSI-027                  | GDSC1    | 1       | 1.46E-01                      |
| PF-4708671               | GDSC1    | 1       | 2.63E-01                      |
| Pictilisib               | GDSC2    | 1       | 3.92E-02                      |
| PIK-93                   | GDSC1    | 1       | 1.22E-01                      |
| Pilaralisib              | GDSC1    | 1       | 1                             |
| Rapamycin                | GDSC2    | 1       | 1                             |
| Talazoparib              | GDSC2    | 1       | 1.37E-01                      |
| Taselisib                | GDSC2    | 1       | 1                             |
| Temsirolimus             | GDSC1    | 1       | 1.34E-01                      |
| Torin-2                  | GDSC1    | 1       | 1.19E-01                      |
| Uprosertib___2106        | GDSC2    | 1       | 2.56E-01                      |
| Voxtalisib               | GDSC1    | 1       | 1.16E-01                      |

|            |       |   |          |
|------------|-------|---|----------|
| WYE-125132 | GDSC1 | 1 | 2.93E-02 |
| YM201636   | GDSC1 | 1 | 1        |
| ZSTK474    | GDSC1 | 1 | 1        |

Table 13: Intersection of selected features between non-haematological cell lines and haematological cell lines

| Drug                   | Database | Setting | P-value (Fisher's exact test) |
|------------------------|----------|---------|-------------------------------|
| Afuresertib            | GDSC2    | 1       | 1.76E-01                      |
| AKT-inhibitor-VIII_228 | GDSC1    | 1       | 1                             |
| Alpelisib              | GDSC2    | 1       | 1.73E-01                      |
| AMG-319                | GDSC2    | 1       | 1                             |
| Apitolisib             | GDSC1    | 1       | 1                             |
| AS605240               | GDSC1    | 1       | 1                             |
| AT13148                | GDSC2    | 1       | 1                             |
| AT7867                 | GDSC1    | 1       | 2.22E-01                      |
| AZD6482_1066           | GDSC1    | 1       | 1                             |
| AZD8055                | GDSC1    | 1       | 1                             |
| AZD8186                | GDSC2    | 1       | 2.51E-01                      |
| Buparlisib             | GDSC2    | 1       | 1                             |
| CX-5461                | GDSC1    | 1       | 1                             |
| CZC24832               | GDSC2    | 1       | 1                             |
| Dactolisib             | GDSC2    | 1       | 1                             |
| GNE-317                | GDSC2    | 1       | 1                             |
| GSK1059615             | GDSC1    | 1       | 1                             |
| GSK690693              | GDSC1    | 1       | 1                             |
| IC-87114               | GDSC1    | 1       | 2.10E-01                      |
| Idelalisib             | GDSC1    | 1       | 1                             |
| Ipatasertib            | GDSC2    | 1       | 1                             |
| LJI308                 | GDSC2    | 1       | 1                             |
| MK-2206                | GDSC2    | 1       | 1                             |
| Niraparib              | GDSC2    | 1       | 1                             |
| NSC319726              | GDSC1    | 1       | 1                             |
| Omipalisib             | GDSC1    | 1       | 1                             |
| OSI-027                | GDSC1    | 1       | 3.63E-03                      |
| PF-4708671             | GDSC1    | 1       | 2.41E-01                      |
| Pictilisib             | GDSC2    | 1       | 1                             |
| PIK-93                 | GDSC1    | 1       | 1                             |
| Pilaralisib            | GDSC1    | 1       | 1                             |
| Rapamycin              | GDSC2    | 1       | 1                             |
| Talazoparib            | GDSC2    | 1       | 1.76E-01                      |
| Taselisib              | GDSC2    | 1       | 1                             |
| Temsirolimus           | GDSC1    | 1       | 1                             |

|                   |       |   |          |
|-------------------|-------|---|----------|
| Torin-2           | GDSC1 | 1 | 1        |
| Uprosertib___2106 | GDSC2 | 1 | 2.24E-01 |
| Voxtalib          | GDSC1 | 1 | 8.97E-02 |
| WYE-125132        | GDSC1 | 1 | 2.52E-01 |
| YM201636          | GDSC1 | 1 | 1        |
| ZSTK474           | GDSC1 | 1 | 1        |

---

Table 14: MERIDA’s output rules for each drug (best model selected based on Youden’s J)

| Drug    | Setting         | Weight function | Rule size | Model rule                                                                                                                                                                                                                 |
|---------|-----------------|-----------------|-----------|----------------------------------------------------------------------------------------------------------------------------------------------------------------------------------------------------------------------------|
| AZD8055 | 1               | linear          | 5         | FKBP5 high expression<br>$\vee$ VHL high expression<br>$\vee$ ROBO2 high expression<br>$\vee$ TRIO low expression<br>$\vee$ NCKAP1 low expression                                                                          |
| AZD8055 | 1               | quadratic       | 4         | ALK Gain of function<br>$\vee$ FKBP5 high expression<br>$\vee$ VHL high expression<br>$\vee$ NCKAP1 low expression                                                                                                         |
| AZD8055 | 1 (iteration 4) | quadratic       | 7         | (ALK Gain of function<br>$\vee$ FKBP5 high expression<br>$\vee$ VHL high expression<br>$\vee$ TRIO low expression<br>$\vee$ NCKAP1 low expression)<br>$\wedge \neg$ (TBX3 high expression<br>$\vee$ PSME3 low expression)  |
| AZD8055 | 1               | cubic           | 4         | ALK Gain of function<br>$\vee$ FKBP5 high expression<br>$\vee$ VHL high expression<br>$\vee$ NCKAP1 low expression                                                                                                         |
| AZD8055 | 1 (iteration 4) | cubic           | 7         | (ALK Gain of function<br>$\vee$ FKBP5 high expression<br>$\vee$ VHL high expression<br>$\vee$ PTEN high expression<br>$\vee$ NCKAP1 low expression)<br>$\wedge \neg$ (RBBP7 low expression<br>$\vee$ HDAC3 low expression) |
| CX-5461 | 1               | linear          | 2         | CLASP2 high expression<br>$\vee$ TJP1 low expression                                                                                                                                                                       |
| CX-5461 | 2               | linear          | 2 (5)*    | known sensitivity determinants<br>$\vee$ CLASP2 high expression<br>$\vee$ TJP1 low expression                                                                                                                              |
| CX-5461 | 3               | linear          | 2         | CLASP2 high expression<br>$\vee$ TJP1 low expression                                                                                                                                                                       |
| CX-5461 | 1               | quadratic       | 2         | TCF4 high expression<br>$\vee$ TJP1 low expression                                                                                                                                                                         |
| CX-5461 | 2               | quadratic       | 2 (5)*    | known sensitivity determinants<br>$\vee$ CLASP2 high expression<br>$\vee$ TJP1 low expression                                                                                                                              |
| CX-5461 | 3               | quadratic       | 2         | TCF4 high expression<br>$\vee$ TJP1 low expression                                                                                                                                                                         |

|            |   |           |        |                                                                                                                                 |
|------------|---|-----------|--------|---------------------------------------------------------------------------------------------------------------------------------|
| CX-5461    | 1 | cubic     | 4      | CLASP2 high expression<br>∨ PRPF8 high expression<br>∨ LIMA1 low expression<br>∨ TJP1 low expression                            |
| CX-5461    | 2 | cubic     | 2 (5)* | known sensitivity determinants<br>∨ CLASP2 high expression<br>∨ TJP1 low expression                                             |
| CX-5461    | 3 | cubic     | 4      | CLASP2 high expression<br>∨ PRPF8 high expression<br>∨ LIMA1 low expression<br>∨ TJP1 low expression                            |
| Dactolisib | 1 | linear    | 2      | MGA Unknown mutation<br>∨ TJP1 low expression                                                                                   |
| Dactolisib | 2 | linear    | 2 (3)* | MGA Unknown mutation<br>∨ known sensitivity determinants<br>∨ TJP1 low expression                                               |
| Dactolisib | 3 | linear    | 2      | MGA Unknown mutation<br>∨ TJP1 low expression                                                                                   |
| Dactolisib | 1 | quadratic | 2      | MGA Unknown mutation<br>∨ TJP1 low expression                                                                                   |
| Dactolisib | 2 | quadratic | 2 (3)* | MGA Unknown mutation<br>∨ known sensitivity determinants<br>∨ TJP1 low expression                                               |
| Dactolisib | 3 | quadratic | 2      | MGA Unknown mutation<br>∨ TJP1 low expression                                                                                   |
| Dactolisib | 1 | cubic     | 2      | MGA Unknown mutation<br>∨ TJP1 low expression                                                                                   |
| Dactolisib | 2 | cubic     | 2 (3)* | MGA Unknown mutation<br>∨ known sensitivity determinants<br>∨ TJP1 low expression                                               |
| Dactolisib | 3 | cubic     | 2      | MGA Unknown mutation<br>∨ TJP1 low expression                                                                                   |
| Niraparib  | 1 | linear    | 5      | ARID4B high expression<br>∨ ARID2 high expression<br>∨ KLF6 low expression<br>∨ TJP1 low expression<br>∨ ARFGEF2 low expression |
| Niraparib  | 1 | quadratic | 4      | ARID2 high expression<br>∨ CASP8 low expression<br>∨ KLF6 low expression<br>∨ TJP1 low expression                               |

|           |                 |           |    |                                                                                                                                                                                                                                                                                |
|-----------|-----------------|-----------|----|--------------------------------------------------------------------------------------------------------------------------------------------------------------------------------------------------------------------------------------------------------------------------------|
| Niraparib | 1 (iteration 4) | quadratic | 7  | ARID4B high expression<br>∨ WASF3 high expression<br>∨ ARID2 high expression<br>∨ CASP8 low expression<br>∨ KLF6 low expression<br>∨ CTTN low expression<br>∨ TJP1 low expression                                                                                              |
| Niraparib | 1               | cubic     | 4  | ARID2 high expression<br>∨ CASP8 low expression<br>∨ KLF6 low expression<br>∨ TJP1 low expression                                                                                                                                                                              |
| Niraparib | 1 (iteration 4) | cubic     | 10 | (ARID4B high expression<br>∨ WASF3 high expression<br>∨ ARID2 high expression<br>∨ CASP8 low expression<br>∨ KLF6 low expression<br>∨ CTTN low expression<br>∨ TJP1 low expression<br>∨ ARNTL low expression)<br>$\wedge \neg$ (FAT2 high expression<br>∨ ATF1 low expression) |
| NSC319726 | 1               | linear    | 5  | CDC73 high expression<br>∨ TCF12 high expression<br>∨ TCF4 high expression<br>∨ TJP1 low expression<br>∨ ADAM10 low expression                                                                                                                                                 |
| NSC319726 | 1               | quadratic | 4  | TCF12 high expression<br>∨ ROBO2 high expression<br>∨ TJP1 low expression<br>∨ ADAM10 low expression                                                                                                                                                                           |
| NSC319726 | 1 (iteration 4) | quadratic | 9  | (TCF12 high expression<br>∨ TGFBR2 high expression<br>∨ IDH2 high expression<br>∨ ROBO2 high expression<br>∨ KLF6 low expression<br>∨ TJP1 low expression<br>∨ ADAM10 low expression<br>∨ RB1 low expression)<br>$\wedge \neg$ RHOA low expression                             |
| NSC319726 | 1               | cubic     | 3  | TCF12 high expression<br>∨ ROBO2 high expression<br>∨ TJP1 low expression                                                                                                                                                                                                      |

|            |                 |           |         |                                                                                                                                                                                                                                                                                                                    |
|------------|-----------------|-----------|---------|--------------------------------------------------------------------------------------------------------------------------------------------------------------------------------------------------------------------------------------------------------------------------------------------------------------------|
| NSC319726  | 1 (iteration 4) | cubic     | 6       | TCF12 high expression<br>∨ TGFBR2 high expression<br>∨ IDH2 high expression<br>∨ ROBO2 high expression<br>∨ TJP1 low expression<br>∨ ADAM10 low expression                                                                                                                                                         |
| Omipalisib | 1               | linear    | 2       | PIK3CA Gain of function<br>∨ TJP1 low expression                                                                                                                                                                                                                                                                   |
| Omipalisib | 1               | quadratic | 2       | AHCTF1 high expression<br>∨ TJP1 low expression                                                                                                                                                                                                                                                                    |
| Omipalisib | 1 (iteration 4) | quadratic | 5       | (SH2B3 high expression<br>∨ AHCTF1 high expression<br>∨ STAG2 low expression<br>∨ TJP1 low expression)                                                                                                                                                                                                             |
| Omipalisib | 1               | cubic     | 4       | $\wedge \neg$ BCLAF1 low expression<br>STAG2 Loss of function<br>∨ SH2B3 high expression<br>∨ AHCTF1 high expression<br>∨ TJP1 low expression                                                                                                                                                                      |
| Omipalisib | 1 (iteration 4) | cubic     | 11      | (TP53BP1 Loss of function<br>∨ PPP2R1A Unknown mutation<br>∨ STAG2 Loss of function<br>∨ CCNE1 CNV gain<br>∨ SH2B3 high expression<br>∨ AHCTF1 high expression<br>∨ TJP1 low expression<br>∨ ARID1A low expression<br>∨ PTPRF low expression )<br>$\wedge \neg$ (NTN4 Unknown mutation<br>∨ TAOK2 low expression ) |
| Rapamycin  | 1               | linear    | 2       | MAP4K1 high expression<br>∨ PTPRF low expression                                                                                                                                                                                                                                                                   |
| Rapamycin  | 2               | linear    | 1 (42)* | known sensitivity determinants<br>∨ TJP1 low expression                                                                                                                                                                                                                                                            |
| Rapamycin  | 3               | linear    | 2       | MAP4K1 high expression<br>∨ PTPRF low expression                                                                                                                                                                                                                                                                   |
| Rapamycin  | 1               | quadratic | 2       | MAP4K1 high expression<br>∨ PTPRF low expression                                                                                                                                                                                                                                                                   |
| Rapamycin  | 2               | quadratic | 2 (43)* | known sensitivity determinants<br>∨ NCKAP1 low expression<br>∨ TJP1 low expression                                                                                                                                                                                                                                 |

|             |   |           |         |                                                                                                                                            |
|-------------|---|-----------|---------|--------------------------------------------------------------------------------------------------------------------------------------------|
| Rapamycin   | 3 | quadratic | 5       | (STK4 Unknown mutation<br>∨ PRKAR1A Unknown mutation<br>∨ MAP4K1 high expression<br>∨ PTPRF low expression)<br>∧¬ ARFGEF2 Unknown mutation |
| Rapamycin   | 1 | cubic     | 4       | (TBL1XR1 Unknown mutation<br>∨ CYTH4 high expression<br>∨ MAP4K1 high expression)<br>∧¬ WT1 high expression                                |
| Rapamycin   | 2 | cubic     | 2 (43)* | known sensitivity determinants<br>∨ NCKAP1 low expression<br>∨ TJP1 low expression                                                         |
| Rapamycin   | 3 | cubic     | 1       | MAP4K1 high expression                                                                                                                     |
| Talazoparib | 1 | linear    | 3       | TCF12 high expression<br>∨ TJP1 low expression<br>∨ HLA-B low expression                                                                   |
| Talazoparib | 2 | linear    | 2 (5)*  | known sensitivity determinants<br>∨ TCF12 high expression<br>∨ TJP1 low expression                                                         |
| Talazoparib | 3 | linear    | 3       | TCF12 high expression<br>∨ TJP1 low expression<br>∨ HLA-B low expression                                                                   |
| Talazoparib | 1 | quadratic | 3       | TCF12 high expression<br>∨ TJP1 low expression<br>∨ HLA-B low expression                                                                   |
| Talazoparib | 2 | quadratic | 3 (6)*  | known sensitivity determinants<br>∨ TCF12 high expression<br>∨ TJP1 low expression<br>∨ HLA-B low expression                               |
| Talazoparib | 3 | quadratic | 3       | TCF12 high expression<br>∨ TJP1 low expression<br>∨ HLA-B low expression                                                                   |
| Talazoparib | 1 | cubic     | 3       | TCF12 high expression<br>∨ TJP1 low expression<br>∨ HLA-B low expression                                                                   |
| Talazoparib | 2 | cubic     | 3 (6)*  | known sensitivity determinants<br>∨ TCF12 high expression<br>∨ TJP1 low expression<br>∨ HLA-B low expression                               |
| Talazoparib | 3 | cubic     | 3       | TCF12 high expression<br>∨ TJP1 low expression<br>∨ HLA-B low expression                                                                   |

|              |   |           |         |                                                                                                                                      |
|--------------|---|-----------|---------|--------------------------------------------------------------------------------------------------------------------------------------|
| Temsirolimus | 1 | linear    | 5       | PTEN Loss of function<br>∨ SMARCB1 high expression<br>∨ WIPF1 high expression<br>∨ PRRX1 high expression<br>∨ DHX9 low expression    |
| Temsirolimus | 2 | linear    | 1 (16)* | known sensitivity determinants<br>∨ TJP1 low expression                                                                              |
| Temsirolimus | 3 | linear    | 5       | PTEN Loss of function<br>∨ SMARCB1 high expression<br>∨ WIPF1 high expression<br>∨ PRRX1 high expression<br>∨ DHX9 low expression    |
| Temsirolimus | 1 | quadratic | 5       | PTEN Loss of function<br>∨ MMP2 high expression<br>∨ SMARCB1 high expression<br>∨ WIPF1 high expression<br>∨ DHX9 low expression     |
| Temsirolimus | 2 | quadratic | 1 (16)* | known sensitivity determinants<br>∨ TJP1 low expression                                                                              |
| Temsirolimus | 3 | quadratic | 5       | PTEN Loss of function<br>∨ MMP2 high expression<br>∨ SMARCB1 high expression<br>∨ WIPF1 high expression<br>∨ DHX9 low expression     |
| Temsirolimus | 1 | cubic     | 4       | PTEN Loss of function<br>∨ MMP2 high expression<br>∨ SMARCB1 high expression<br>∨ WIPF1 high expression                              |
| Temsirolimus | 2 | cubic     | 3 (18)* | (PTEN Loss of function<br>∨ known sensitivity determinants<br>∨ MAP4K1 high expression)<br>∧¬ MAGI2 Unknown mutation                 |
| Temsirolimus | 3 | cubic     | 4       | PTEN Loss of function<br>∨ MMP2 high expression<br>∨ SMARCB1 high expression<br>∨ WIPF1 high expression                              |
| Voxtalib     | 1 | linear    | 1       | TJP1 low expression                                                                                                                  |
| Voxtalib     | 1 | quadratic | 5       | BRAF Gain of function<br>∨ PPP2R5A high expression<br>∨ XPO1 high expression<br>∨ BCL11A high expression<br>∨ CSNK1G3 low expression |

|          |                 |           |    |                                                                                                                                                                                                                                                                                                                                                                                                                              |
|----------|-----------------|-----------|----|------------------------------------------------------------------------------------------------------------------------------------------------------------------------------------------------------------------------------------------------------------------------------------------------------------------------------------------------------------------------------------------------------------------------------|
| Voxtalib | 1 (iteration 4) | quadratic | 13 | (BRAF Gain of function<br>$\vee$ CDK12 Unknown mutation<br>$\vee$ TGFB1 CNV gain<br>$\vee$ PPP2R5A high expression<br>$\vee$ CNOT4 high expression<br>$\vee$ XPO1 high expression<br>$\vee$ BCL11A high expression<br>$\vee$ CSNK1G3 low expression)<br>$\wedge \neg$ (CHD6 Unknown mutation<br>$\vee$ HDAC9 Unknown mutation<br>$\vee$ CAT Unknown mutation<br>$\vee$ SMURF2 high expression<br>$\vee$ CAST low expression) |
| Voxtalib | 1               | cubic     | 6  | (MITF CNV gain<br>$\vee$ PPP2R5A high expression<br>$\vee$ XPO1 high expression<br>$\vee$ BCL11A high expression<br>$\vee$ CSNK1G3 low expression)<br>$\wedge \neg$ CHD6 Unknown mutation                                                                                                                                                                                                                                    |
| Voxtalib | 1 (iteration 4) | cubic     | 10 | (MTOR neutral mutations<br>$\vee$ MITF CNV gain<br>$\vee$ PPP2R5A high expression<br>$\vee$ XPO1 high expression<br>$\vee$ BCL11A high expression<br>$\vee$ PIK3C2B low expression<br>$\vee$ CSNK1G3 low expression)<br>$\wedge \neg$ (CHD6 Unknown mutation<br>$\vee$ NCF2 high expression<br>$\vee$ PIK3R3 high expression)                                                                                                |

\* Known sensitivity determinants for the respective drugs can be found in Supplement 1. The provided rule size denotes the number of terms without known sensitivity determinants, while the number in brackets includes them.

Table 15: LOBICO's output rules for each drug (best model selected based on Youden's J)

| Drug    | Setting | Weight function | Rule size | Model rule                                           |
|---------|---------|-----------------|-----------|------------------------------------------------------|
| AZD8055 | 1       | linear          | 1         | TJP1 low expression                                  |
| AZD8055 | 1       | quadratic       | 1         | NCKAP1 low expression                                |
| AZD8055 | 1       | cubic           | 1         | NCKAP1 low expression                                |
| CX-5461 | 3       | linear          | 2         | TJP1 low expression<br>$\vee$ CLASP2 high expression |
| CX-5461 | 3       | quadratic       | 2         | TJP1 low expression<br>$\vee$ TCF4 high expression   |

|              |   |           |   |                                                                |
|--------------|---|-----------|---|----------------------------------------------------------------|
| CX-5461      | 3 | cubic     | 2 | TJP1 low expression<br>∨ TCF4 high expression                  |
| Dactolisib   | 3 | linear    | 2 | MGA Unknown mutation<br>∨ TJP1 low expression                  |
| Dactolisib   | 3 | quadratic | 2 | MGA Unknown mutation<br>∨ TJP1 low expression                  |
| Dactolisib   | 3 | cubic     | 2 | MGA Unknown mutation<br>∨ TJP1 low expression                  |
| Niraparib    | 1 | linear    | 2 | TJP1 low expression<br>∨ CASP8 low expression                  |
| Niraparib    | 1 | quadratic | 2 | TJP1 low expression<br>∨ KLF6 low expression                   |
| Niraparib    | 1 | cubic     | 2 | TJP1 low expression<br>∨ KLF6 low expression                   |
| NSC319726    | 1 | linear    | 2 | TJP1 low expression<br>∨ TCF12 high expression                 |
| NSC319726    | 1 | quadratic | 2 | TJP1 low expression<br>∨ TCF12 high expression                 |
| NSC319726    | 1 | cubic     | 2 | TJP1 low expression<br>∨ TCF12 high expression                 |
| Omipalisib   | 1 | linear    | 2 | PIK3CA Gain of function<br>∨ TJP1 low expression               |
| Omipalisib   | 1 | quadratic | 2 | AHCTF1 high expression<br>∨ TJP1 low expression                |
| Omipalisib   | 1 | cubic     | 1 | TJP1 low expression                                            |
| Rapamycin    | 3 | linear    | 2 | PTPRF low expression<br>∨ MAP4K1 high expression               |
| Rapamycin    | 3 | quadratic | 2 | MAP4K1 high expression<br>$\wedge \neg$ PTPRU Unknown mutation |
| Rapamycin    | 3 | cubic     | 1 | MAP4K1 high expression                                         |
| Talazoparib  | 3 | linear    | 2 | TCF12 high expression<br>∨ TJP1 low expression                 |
| Talazoparib  | 3 | quadratic | 2 | TCF12 high expression<br>∨ TJP1 low expression                 |
| Talazoparib  | 3 | cubic     | 2 | TCF12 high expression<br>∨ TJP1 low expression                 |
| Temsirolimus | 3 | linear    | 1 | TJP1 low expression                                            |
| Temsirolimus | 3 | quadratic | 1 | TJP1 low expression                                            |
| Temsirolimus | 3 | cubic     | 2 | MAP4K1 high expression<br>∨ MMP2 high expression               |
| Voxtalisib   | 1 | linear    | 1 | TJP1 low expression                                            |
| Voxtalisib   | 1 | quadratic | 2 | SCAI high expression<br>∨ NCKAP1 low expression                |

|            |   |       |   |                                                             |
|------------|---|-------|---|-------------------------------------------------------------|
| Voxtalisib | 1 | cubic | 2 | NCKAP1 low expression<br>$\wedge \neg$ MLH1 high expression |
|------------|---|-------|---|-------------------------------------------------------------|

---

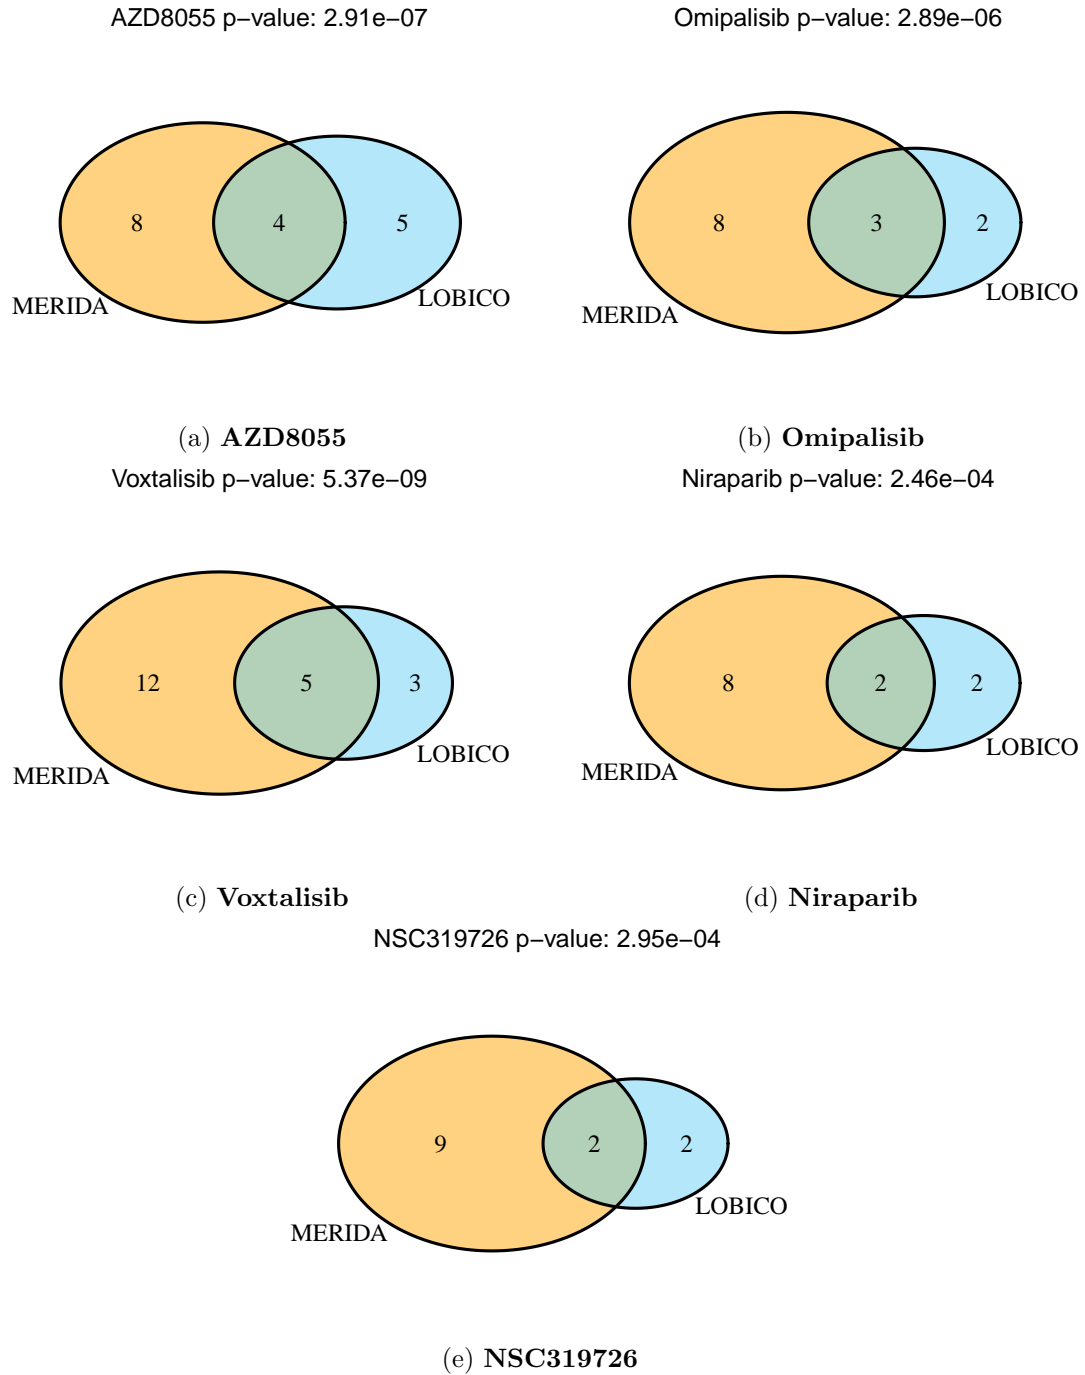

Figure 30: In Sub-Figure (a - e), we present Venn diagrams with the respective Fisher's exact test overlap p-value for the selected features between LOBICO and MERIDA.

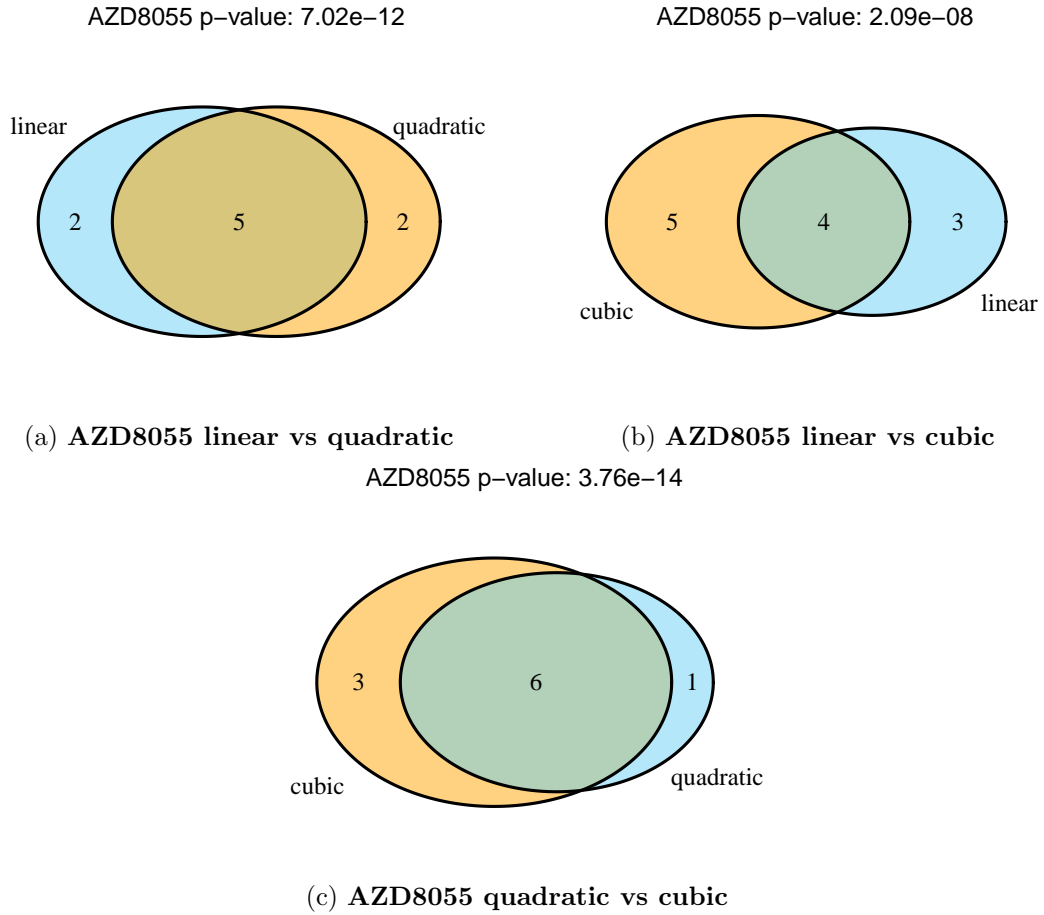

Figure 31: In Sub-Figure (a - c), we present Venn diagrams with the respective Fisher's exact test overlap p-value for the selected features of MERIDA for AZD8055 between the three different weight functions. The remaining overlap p-values for all other drugs can be found in Table 16.

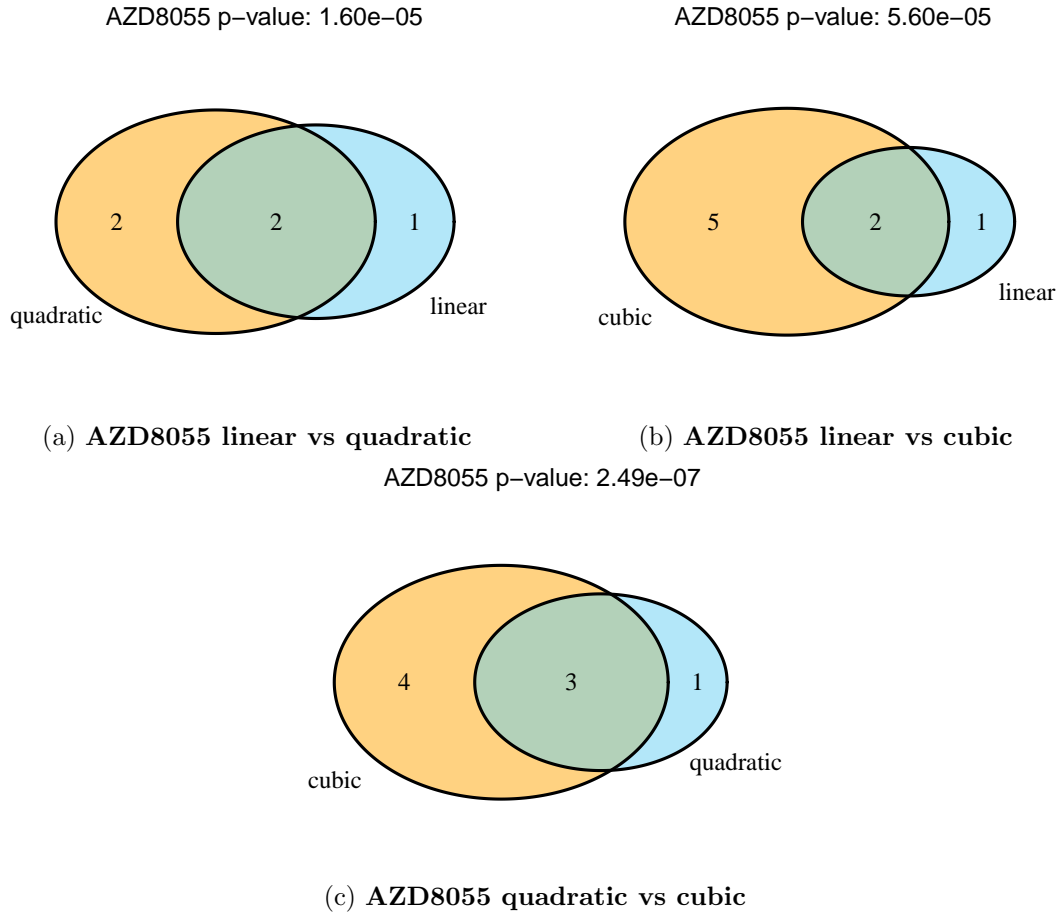

Figure 32: In Sub-Figure (a - c), we present Venn diagrams with the respective Fisher's exact test overlap p-value for the selected features of LOBICO for AZD8055 between the three different weight functions. The remaining overlap p-values for all other drugs can be found in Table 17.

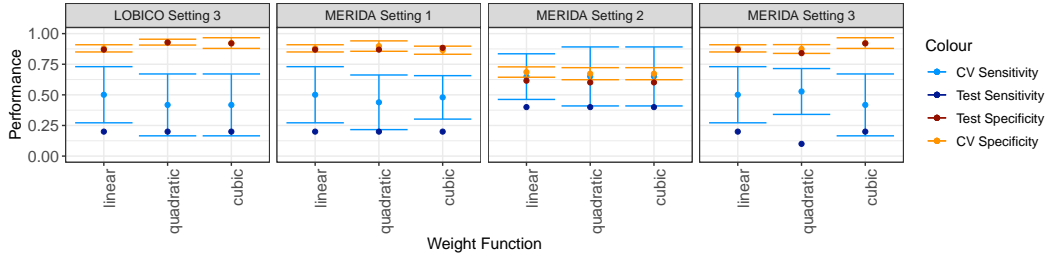

(a) Rapamycin

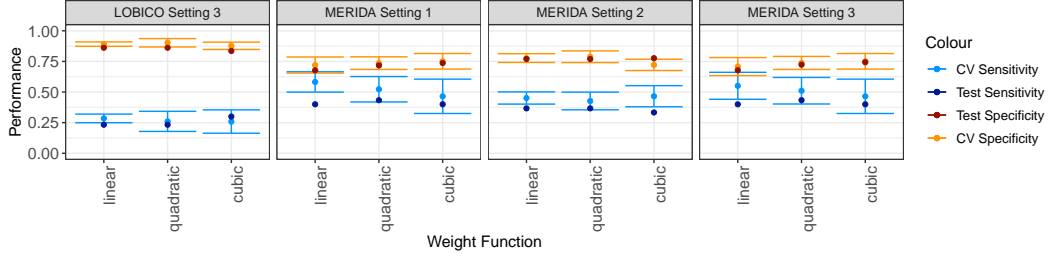

(b) Temsirolimus

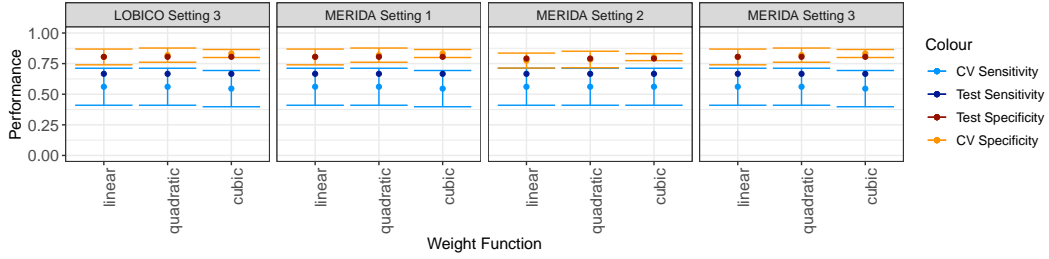

(c) Dactolisib

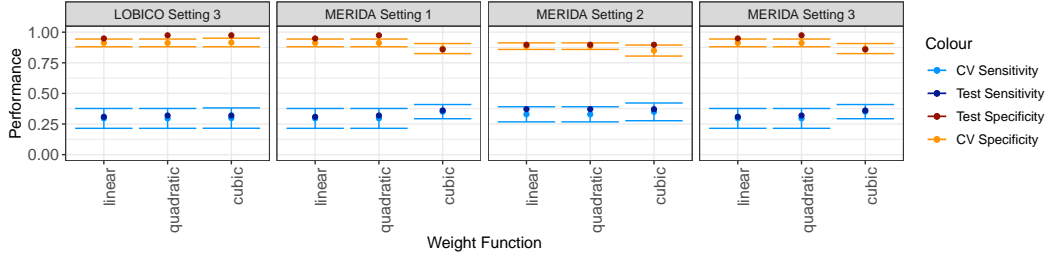

(d) CX-5461

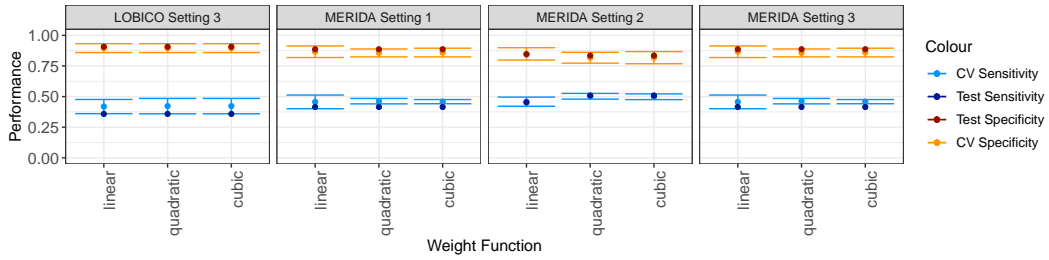

(e) Talazoparib

Figure 33: In Sub-Figure (a - e), we present the statistical performance for all drugs with a priori knowledge during CV as well as on a test set.

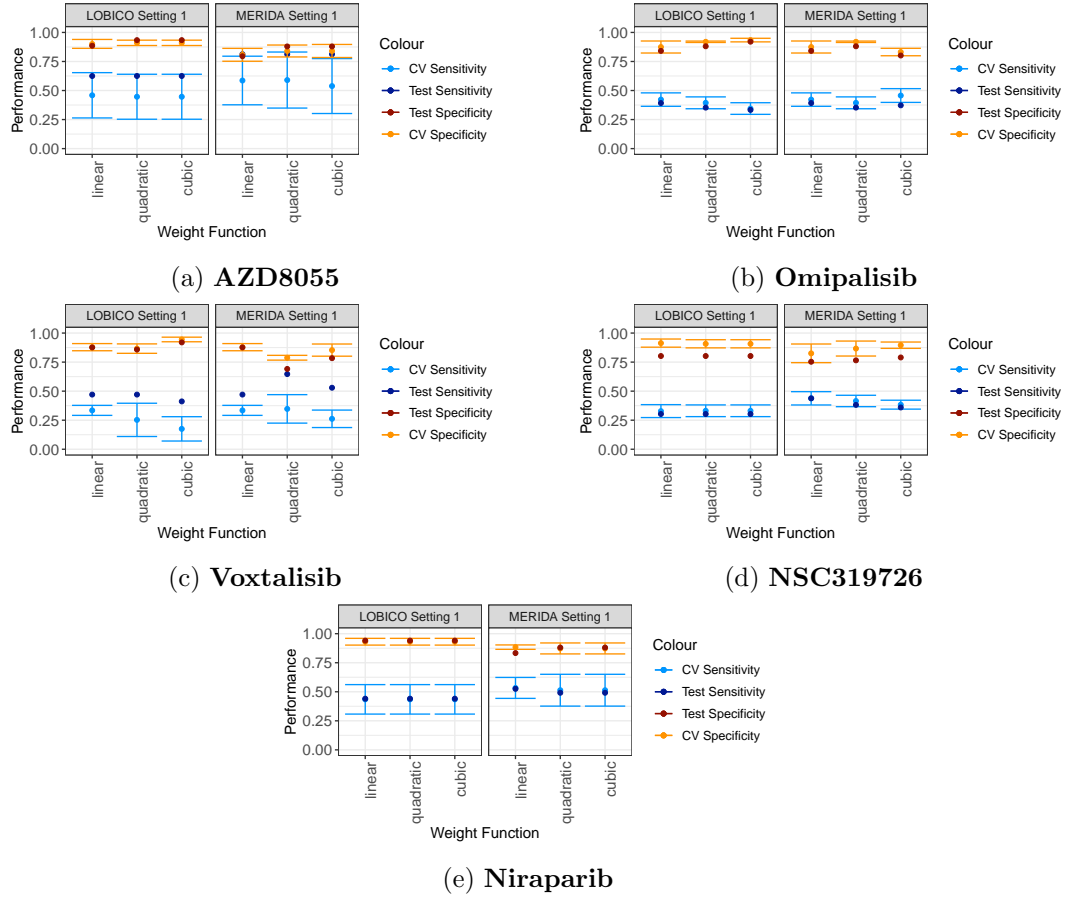

Figure 34: In Sub-Figure (a - e), we present the statistical performance for the drugs without a priori knowledge during CV as well as on a test set.

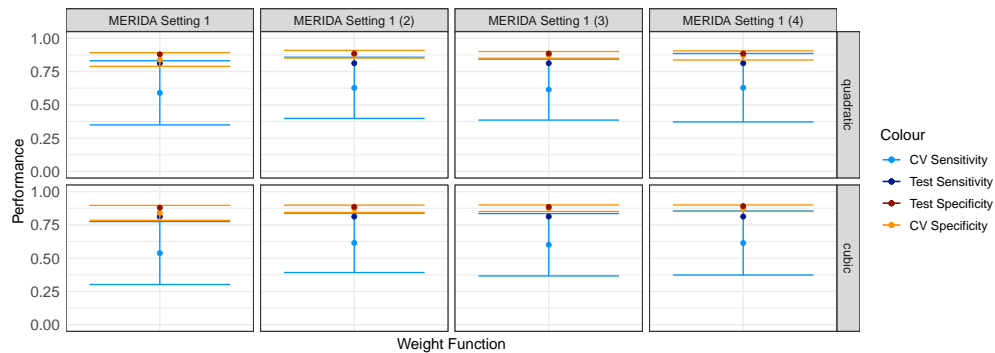

(a) AZD8055

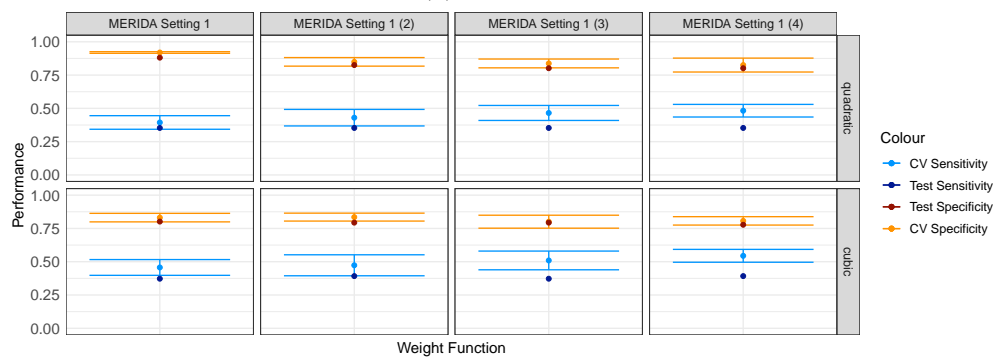

(b) Omipalisib

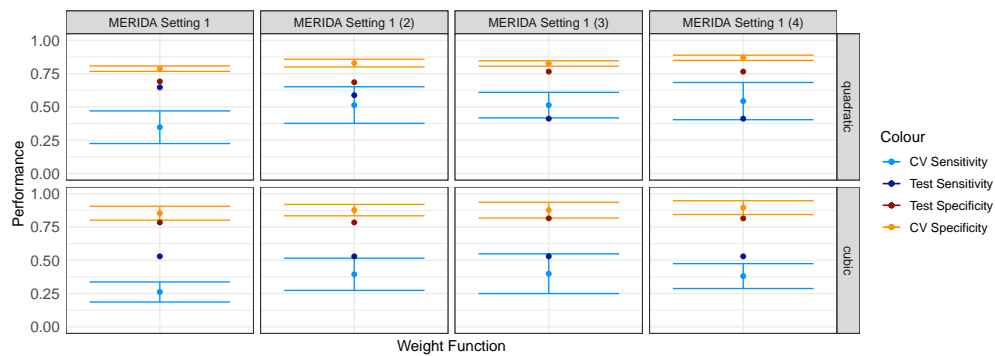

(c) Voxelalisib

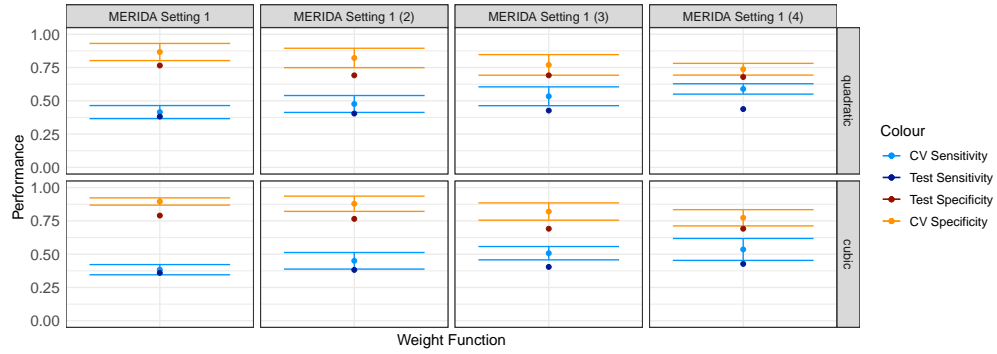

(d) NSC319726

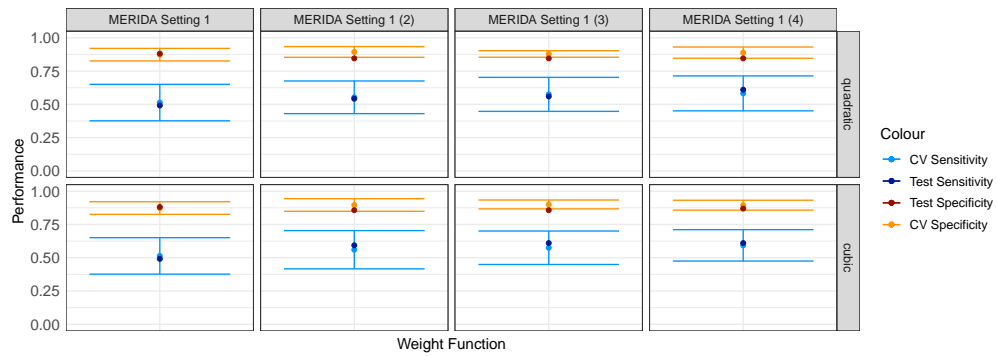

(e) Niraparib

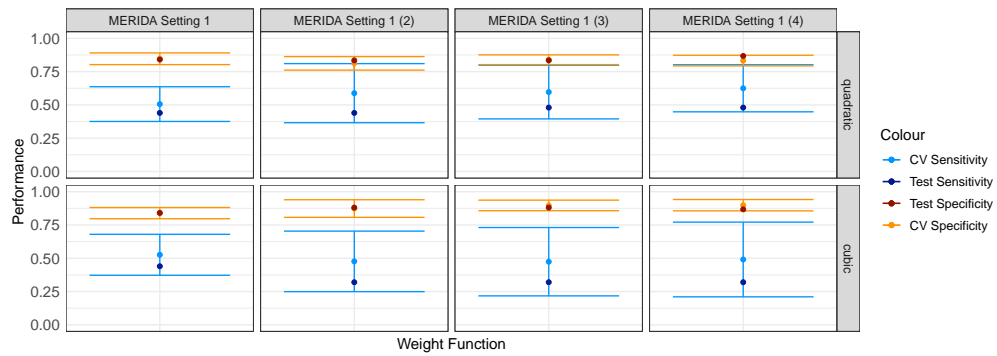

(f) AS605240

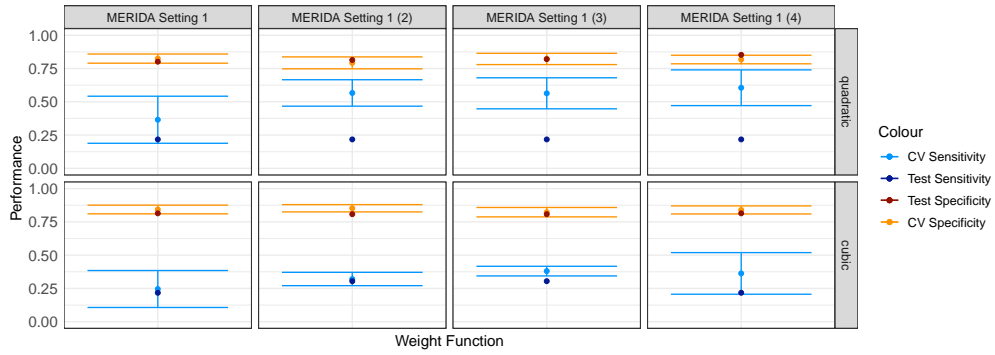

(g) **Pilaralisib**

Figure 35: In Sub-Figure (a - g), we present the statistical performance for drugs without a priori knowledge during CV as well as on a test set when iteratively using the features from previous applications of our method as a priori knowledge for a new run.

Table 16: Similarity of selected features for different weight functions for MERIDA

| Drug        | Database | Setting | Compared weight functions | P-value (Fisher's exact test) |
|-------------|----------|---------|---------------------------|-------------------------------|
| AZD8055     | GDSC1    | 1       | linear, quadratic         | 7.02E-12                      |
| AZD8055     | GDSC1    | 1       | linear, cubic             | 2.09E-08                      |
| AZD8055     | GDSC1    | 1       | quadratic, cubic          | 3.76E-14                      |
| CX-5461     | GDSC1    | 2       | linear, quadratic         | 4.95E-14                      |
| CX-5461     | GDSC1    | 2       | linear, cubic             | 1.15E-08                      |
| CX-5461     | GDSC1    | 2       | quadratic, cubic          | 1.24E-14                      |
| CX-5461     | GDSC1    | 3       | linear, quadratic         | 4.21E-06                      |
| CX-5461     | GDSC1    | 3       | linear, cubic             | 2.77E-04                      |
| CX-5461     | GDSC1    | 3       | quadratic, cubic          | 9.29E-14                      |
| CX-5461     | GDSC1    | 1       | linear, quadratic         | 1.98E-04                      |
| CX-5461     | GDSC1    | 1       | linear, cubic             | 2.77E-04                      |
| CX-5461     | GDSC1    | 1       | quadratic, cubic          | 4.42E-16                      |
| Dactolisib  | GDSC2    | 2       | linear, quadratic         | 6.19E-22                      |
| Dactolisib  | GDSC2    | 2       | linear, cubic             | 2.72E-18                      |
| Dactolisib  | GDSC2    | 2       | quadratic, cubic          | 3.40E-20                      |
| Dactolisib  | GDSC2    | 3       | linear, quadratic         | 2.47E-20                      |
| Dactolisib  | GDSC2    | 3       | linear, cubic             | 4.07E-17                      |
| Dactolisib  | GDSC2    | 3       | quadratic, cubic          | 3.34E-22                      |
| Dactolisib  | GDSC2    | 1       | linear, quadratic         | 2.49E-20                      |
| Dactolisib  | GDSC2    | 1       | linear, cubic             | 4.09E-17                      |
| Dactolisib  | GDSC2    | 1       | quadratic, cubic          | 3.36E-22                      |
| Niraparib   | GDSC2    | 1       | linear, quadratic         | 1.30E-11                      |
| Niraparib   | GDSC2    | 1       | linear, cubic             | 1.30E-11                      |
| Niraparib   | GDSC2    | 1       | quadratic, cubic          | 7.01E-17                      |
| NSC319726   | GDSC1    | 1       | linear, quadratic         | 2.02E-06                      |
| NSC319726   | GDSC1    | 1       | linear, cubic             | 2.02E-06                      |
| NSC319726   | GDSC1    | 1       | quadratic, cubic          | 6.62E-17                      |
| Omipalisib  | GDSC1    | 1       | linear, quadratic         | 5.74E-09                      |
| Omipalisib  | GDSC1    | 1       | linear, cubic             | 2.15E-06                      |
| Omipalisib  | GDSC1    | 1       | quadratic, cubic          | 3.08E-15                      |
| Rapamycin   | GDSC2    | 2       | linear, quadratic         | 1.41E-14                      |
| Rapamycin   | GDSC2    | 2       | linear, cubic             | 1.69E-10                      |
| Rapamycin   | GDSC2    | 2       | quadratic, cubic          | 9.03E-16                      |
| Rapamycin   | GDSC2    | 3       | linear, quadratic         | 1.31E-05                      |
| Rapamycin   | GDSC2    | 3       | linear, cubic             | 1.17E-03                      |
| Rapamycin   | GDSC2    | 3       | quadratic, cubic          | 1.31E-05                      |
| Rapamycin   | GDSC2    | 1       | linear, quadratic         | 7.73E-06                      |
| Rapamycin   | GDSC2    | 1       | linear, cubic             | 1.23E-05                      |
| Rapamycin   | GDSC2    | 1       | quadratic, cubic          | 1.37E-14                      |
| Talazoparib | GDSC2    | 2       | linear, quadratic         | 9.17E-11                      |

|              |       |   |                   |          |
|--------------|-------|---|-------------------|----------|
| Talazoparib  | GDSC2 | 2 | linear, cubic     | 3.73E-08 |
| Talazoparib  | GDSC2 | 2 | quadratic, cubic  | 7.67E-12 |
| Talazoparib  | GDSC2 | 3 | linear, quadratic | 1.14E-22 |
| Talazoparib  | GDSC2 | 3 | linear, cubic     | 8.24E-18 |
| Talazoparib  | GDSC2 | 3 | quadratic, cubic  | 2.50E-20 |
| Talazoparib  | GDSC2 | 1 | linear, quadratic | 1.13E-22 |
| Talazoparib  | GDSC2 | 1 | linear, cubic     | 8.20E-18 |
| Talazoparib  | GDSC2 | 1 | quadratic, cubic  | 2.49E-20 |
| Temsirolimus | GDSC1 | 2 | linear, quadratic | 1.24E-14 |
| Temsirolimus | GDSC1 | 2 | linear, cubic     | 1.86E-11 |
| Temsirolimus | GDSC1 | 2 | quadratic, cubic  | 1.90E-17 |
| Temsirolimus | GDSC1 | 3 | linear, quadratic | 6.98E-12 |
| Temsirolimus | GDSC1 | 3 | linear, cubic     | 1.16E-08 |
| Temsirolimus | GDSC1 | 3 | quadratic, cubic  | 1.24E-14 |
| Temsirolimus | GDSC1 | 1 | linear, quadratic | 6.93E-12 |
| Temsirolimus | GDSC1 | 1 | linear, cubic     | 1.15E-08 |
| Temsirolimus | GDSC1 | 1 | quadratic, cubic  | 1.24E-14 |
| Voxtalisisib | GDSC1 | 1 | linear, quadratic | 2.44E-12 |
| Voxtalisisib | GDSC1 | 1 | linear, cubic     | 2.89E-07 |
| Voxtalisisib | GDSC1 | 1 | quadratic, cubic  | 1.15E-19 |

Table 17: Similarity of selected features for different weight functions for LOBICO

| Drug       | Database | Setting | Compared weight functions | P-value (Fisher’s exact test) |
|------------|----------|---------|---------------------------|-------------------------------|
| AZD8055    | GDSC1    | 1       | linear, quadratic         | 1.60E-05                      |
| AZD8055    | GDSC1    | 1       | linear, cubic             | 5.60E-05                      |
| AZD8055    | GDSC1    | 1       | quadratic, cubic          | 2.49E-07                      |
| CX-5461    | GDSC1    | 3       | linear, quadratic         | 7.98E-06                      |
| CX-5461    | GDSC1    | 3       | linear, cubic             | 5.98E-03                      |
| CX-5461    | GDSC1    | 3       | quadratic, cubic          | 7.98E-06                      |
| Dactolisib | GDSC2    | 3       | linear, quadratic         | 1.87E-08                      |
| Dactolisib | GDSC2    | 3       | linear, cubic             | 1.87E-08                      |
| Dactolisib | GDSC2    | 3       | quadratic, cubic          | 1.73E-14                      |
| Niraparib  | GDSC2    | 1       | linear, quadratic         | 8.25E-06                      |
| Niraparib  | GDSC2    | 1       | linear, cubic             | 8.25E-06                      |
| Niraparib  | GDSC2    | 1       | quadratic, cubic          | 1.87E-09                      |
| NSC319726  | GDSC1    | 1       | linear, quadratic         | 1.81E-09                      |
| NSC319726  | GDSC1    | 1       | linear, cubic             | 8.10E-06                      |
| NSC319726  | GDSC1    | 1       | quadratic, cubic          | 8.10E-06                      |
| Omipalisib | GDSC1    | 1       | linear, quadratic         | 5.98E-03                      |
| Omipalisib | GDSC1    | 1       | linear, cubic             | 5.98E-03                      |
| Omipalisib | GDSC1    | 1       | quadratic, cubic          | 1.77E-09                      |
| Rapamycin  | GDSC2    | 3       | linear, quadratic         | 1.80E-10                      |

|              |       |   |                   |          |
|--------------|-------|---|-------------------|----------|
| Rapamycin    | GDSC2 | 3 | linear, cubic     | 2.64E-07 |
| Rapamycin    | GDSC2 | 3 | quadratic, cubic  | 3.52E-15 |
| Talazoparib  | GDSC2 | 3 | linear, quadratic | 8.30E-06 |
| Talazoparib  | GDSC2 | 3 | linear, cubic     | 8.30E-06 |
| Talazoparib  | GDSC2 | 3 | quadratic, cubic  | 1.88E-09 |
| Temsirolimus | GDSC1 | 3 | linear, quadratic | 7.99E-06 |
| Temsirolimus | GDSC1 | 3 | linear, cubic     | 1        |
| Temsirolimus | GDSC1 | 3 | quadratic, cubic  | 1        |
| Voxtalisisib | GDSC1 | 1 | linear, quadratic | 1        |
| Voxtalisisib | GDSC1 | 1 | linear, cubic     | 1.19E-02 |
| Voxtalisisib | GDSC1 | 1 | quadratic, cubic  | 3.55E-08 |

Table 18: Comparison between selected features for LOBICO vs MERIDA

| Drug         | Database | Setting | P-value (Fisher’s exact test) |
|--------------|----------|---------|-------------------------------|
| AZD8055      | GDSC1    | 1       | 2.91E-07                      |
| CX-5461      | GDSC1    | 3       | 6.39E-06                      |
| Dactolisib   | GDSC2    | 3       | 8.42E-06                      |
| Niraparib    | GDSC2    | 1       | 2.46E-04                      |
| NSC319726    | GDSC1    | 1       | 2.95E-04                      |
| Omipalisib   | GDSC1    | 1       | 2.89E-06                      |
| Rapamycin    | GDSC2    | 3       | 2.11E-13                      |
| Talazoparib  | GDSC2    | 3       | 4.27E-04                      |
| Temsirolimus | GDSC1    | 3       | 1.53E-10                      |
| Voxtalisisib | GDSC1    | 1       | 5.37E-09                      |

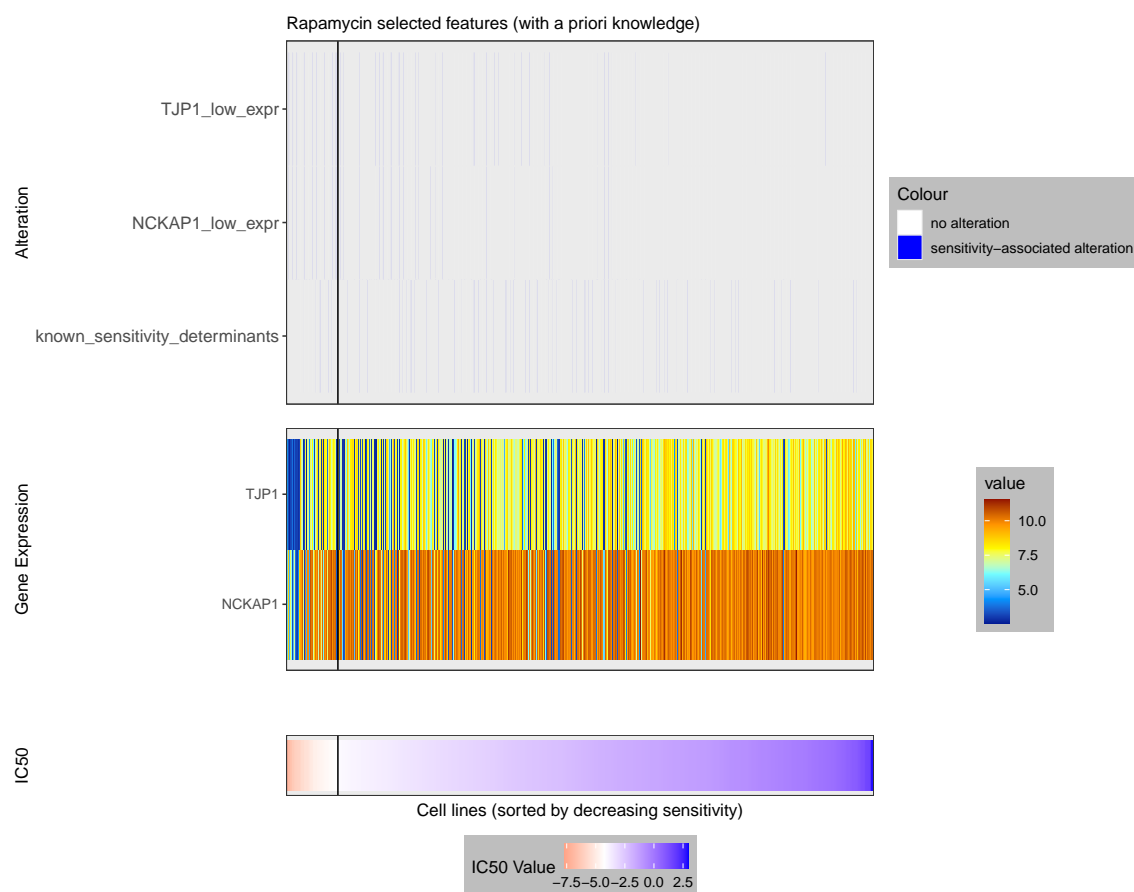

Figure 36: This figure depicts the selected features for the best model (selected with Youden's J) for Rapamycin using the quadratic weight function. The cell lines on the x-axis are sorted by decreasing sensitivity, i.e. increasing logarithmized IC50 value.

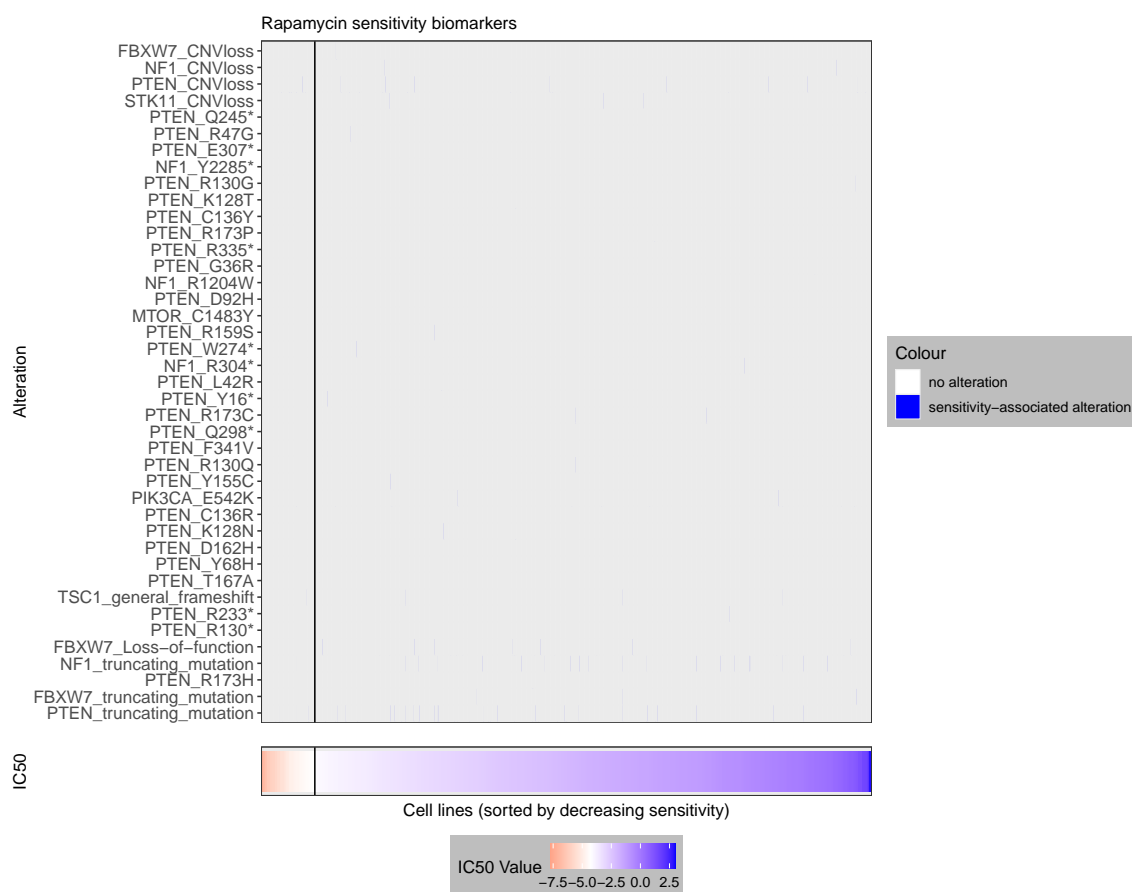

Figure 37: This figure depicts the a priori knowledge (i.e. the sensitivity biomarkers) for Rapamycin and its distribution throughout the cell lines. The cell lines on the x-axis are sorted by decreasing sensitivity, i.e. increasing logarithmized IC50 value.

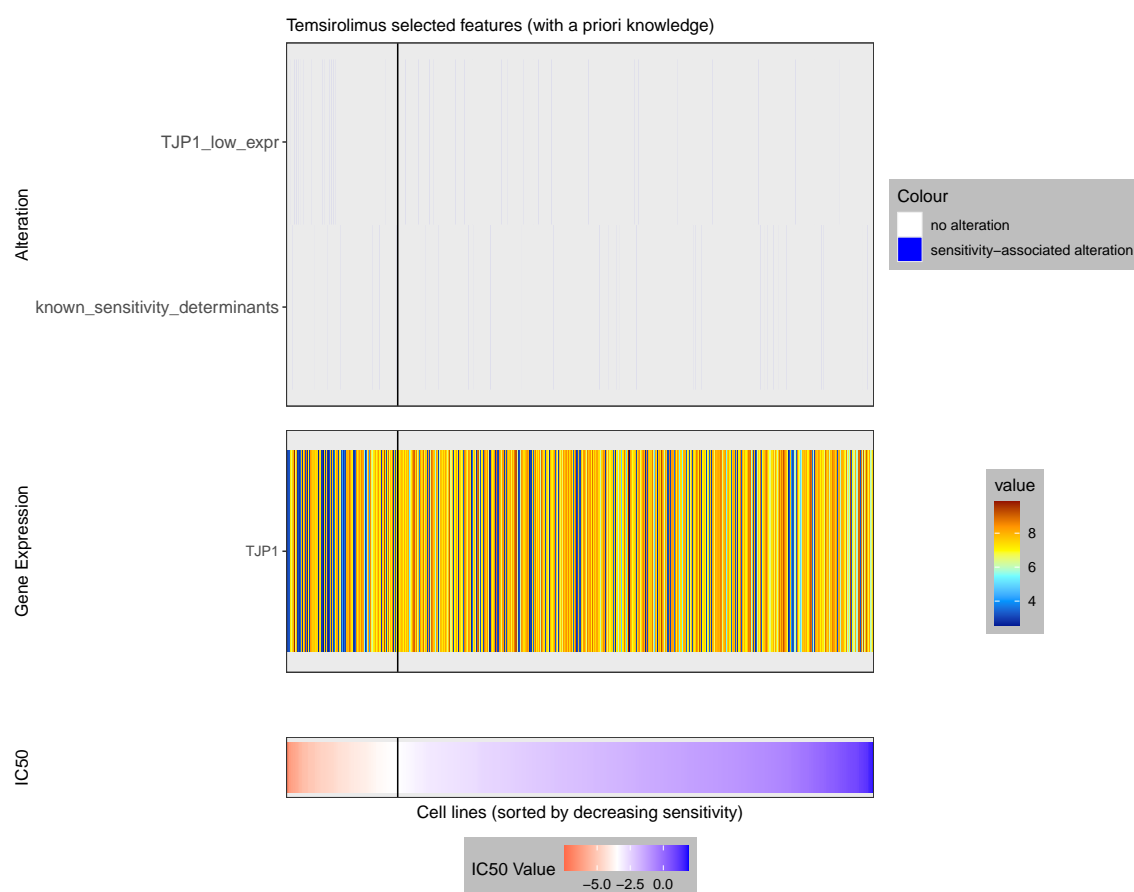

Figure 38: This figure depicts the selected features for the best model (selected with Youden's J) for Tamsirolimus using the quadratic weight function. The cell lines on the x-axis are sorted by decreasing sensitivity, i.e. increasing logarithmized IC50 value.

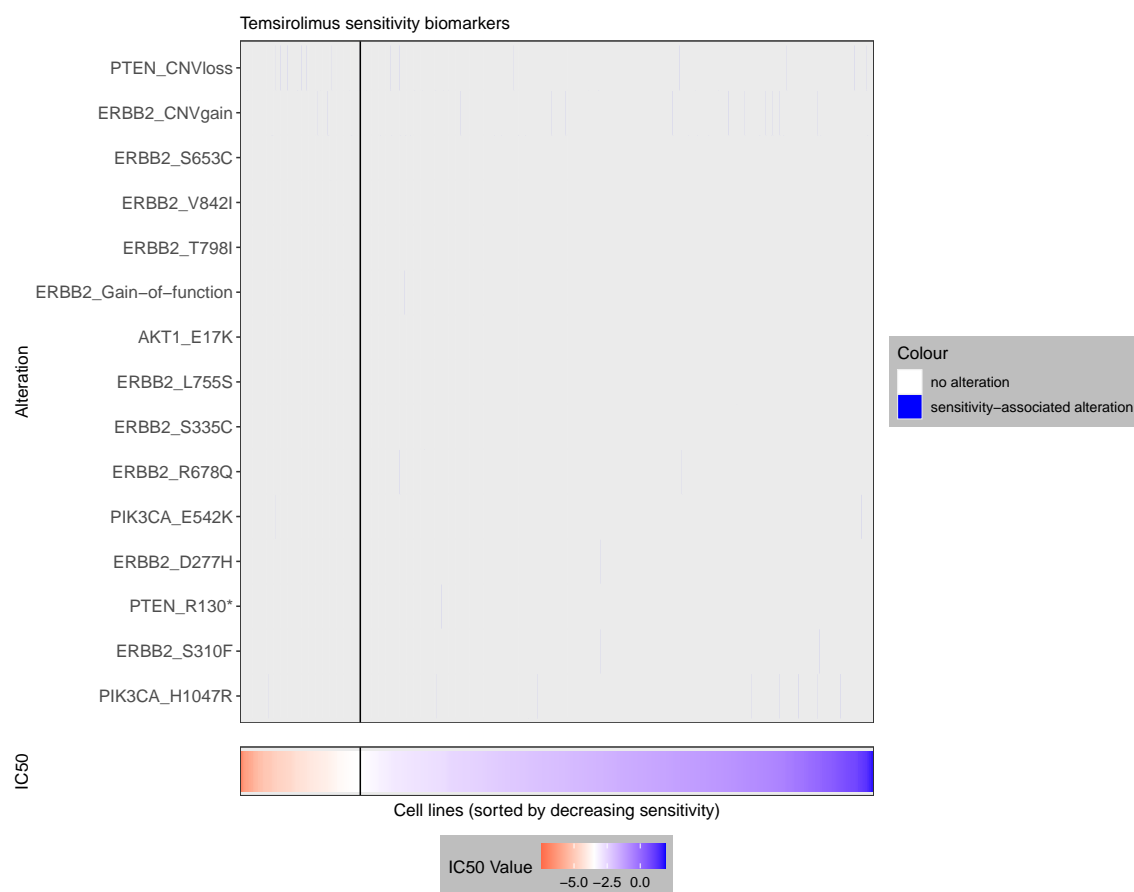

Figure 39: This figure depicts the a priori knowledge (i.e. the sensitivity biomarkers) for Temsirolimus and its distribution throughout the cell lines. The cell lines on the x-axis are sorted by decreasing sensitivity, i.e. increasing logarithmized IC50 value.

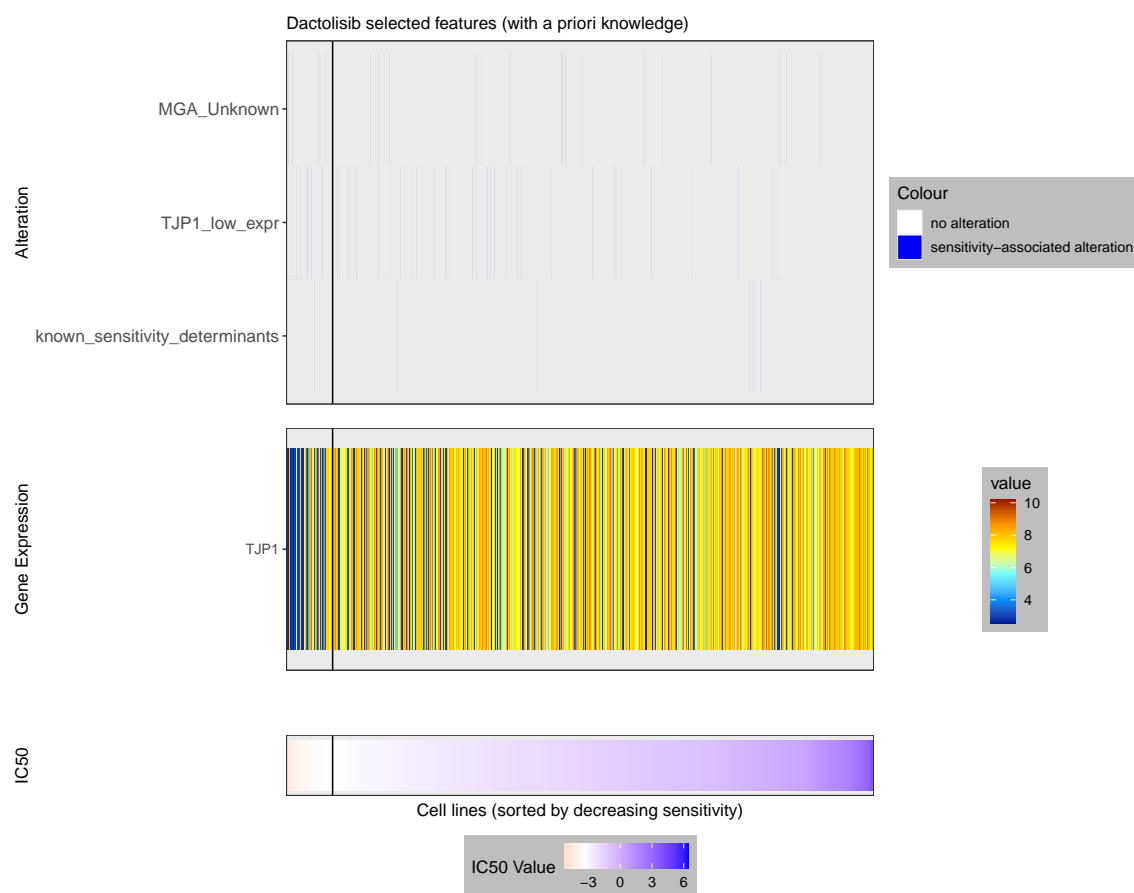

Figure 40: This figure depicts the selected features for the best model (selected with Youden's J) for Dactolisib using the quadratic weight function. The cell lines on the x-axis are sorted by decreasing sensitivity, i.e. increasing logarithmized IC50 value. Note that the a priori knowledge consists only of one mutation (PIK3CA H1047R).

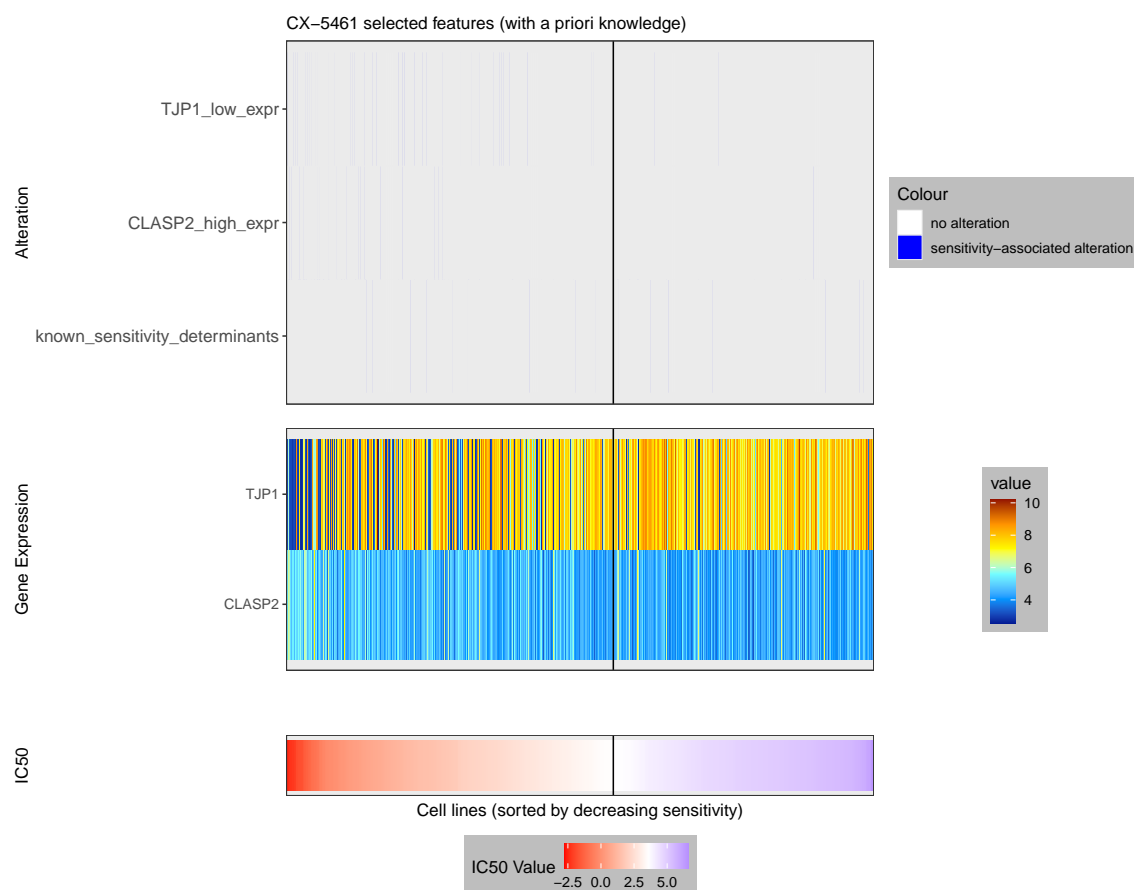

Figure 41: This figure depicts the selected features for the best model (selected with Youden's J) for CX-5461 using the quadratic weight function. The cell lines on the x-axis are sorted by decreasing sensitivity, i.e. increasing logarithmized IC50 value.

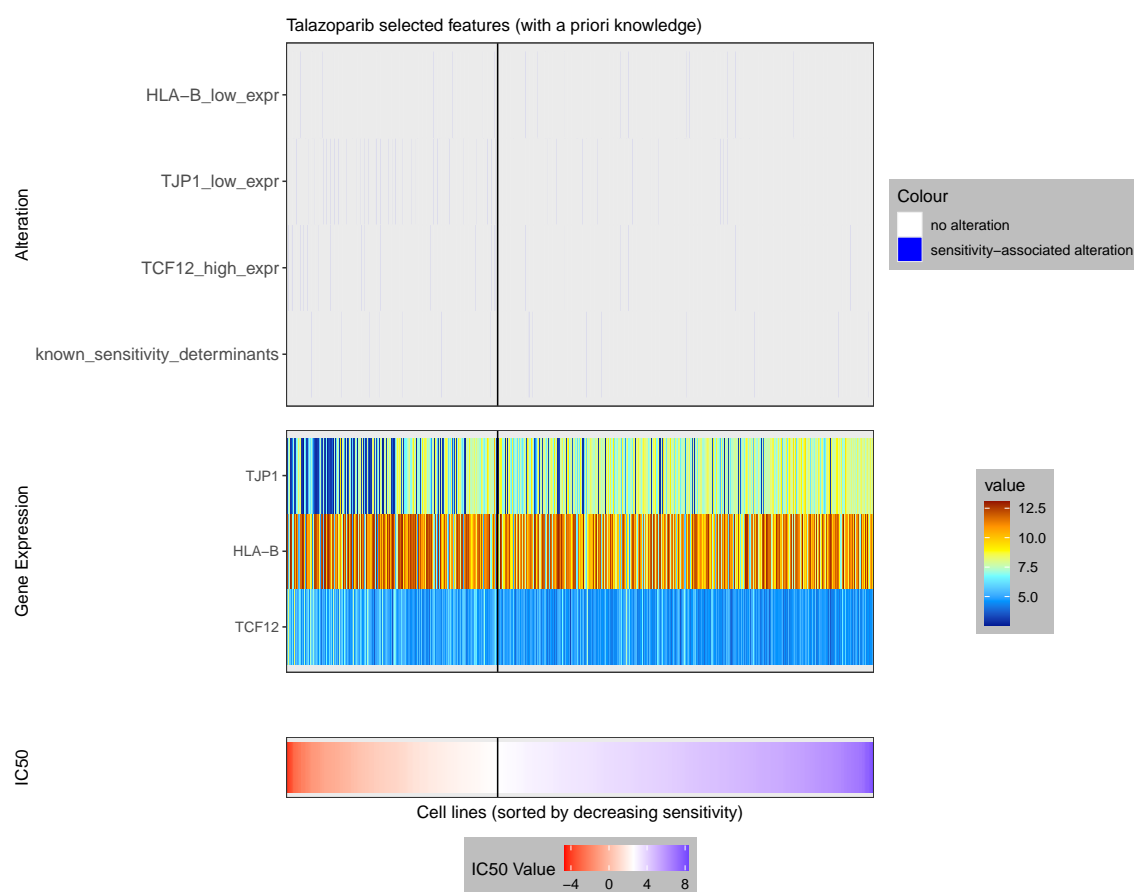

Figure 42: This figure depicts the selected features for the best model (selected with Youden's J) for Talazoparib using the quadratic weight function. The cell lines on the x-axis are sorted by decreasing sensitivity, i.e. increasing logarithmized IC50 value.

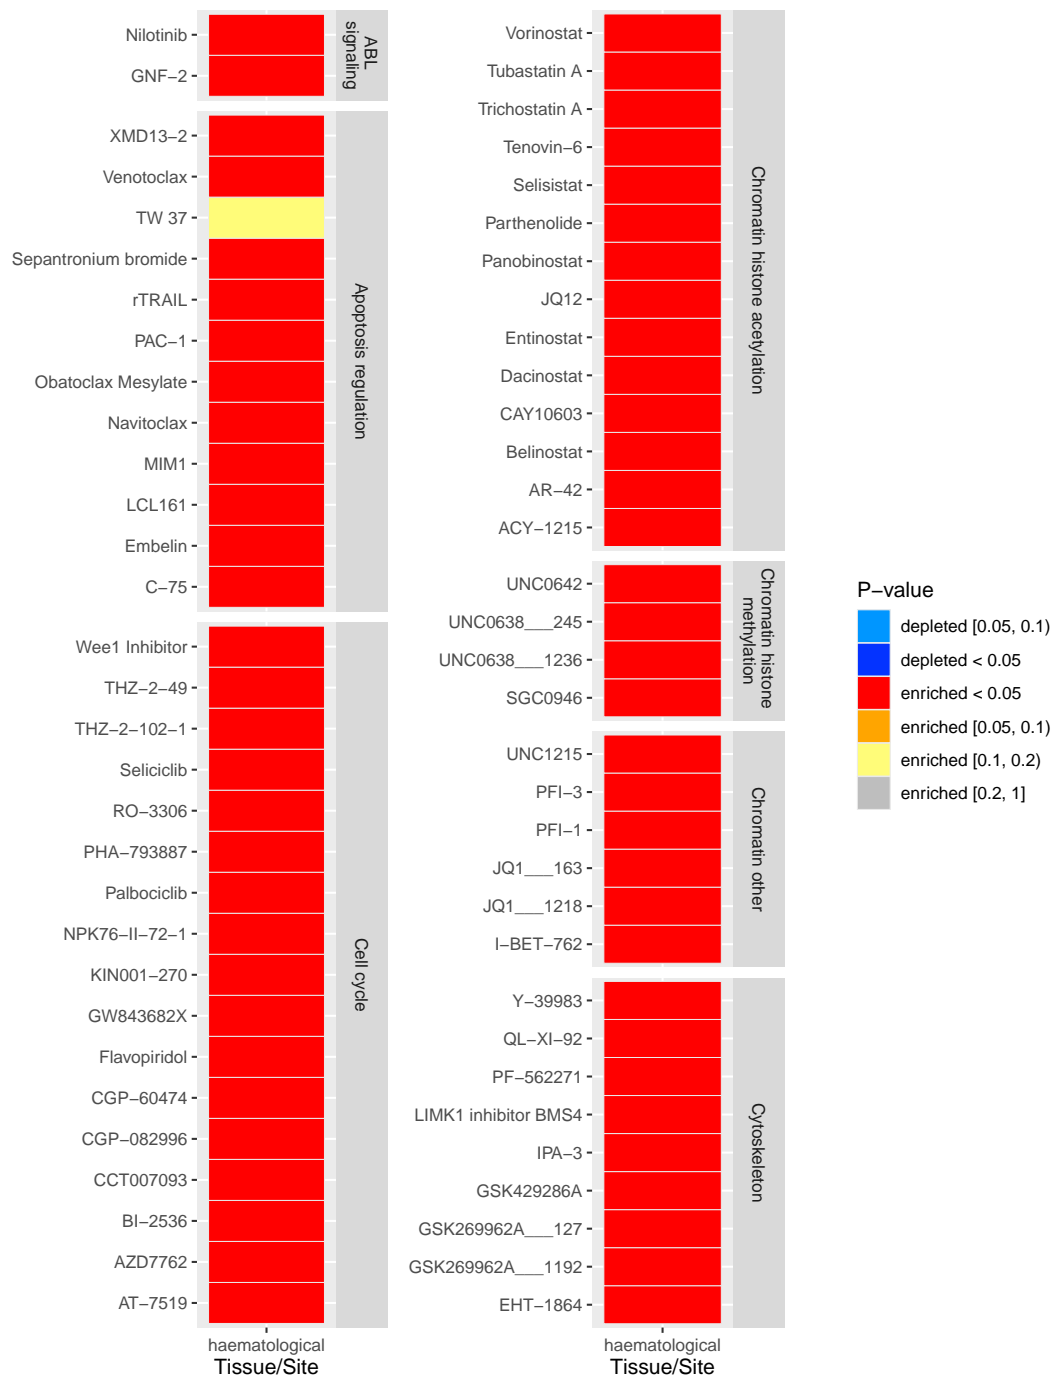

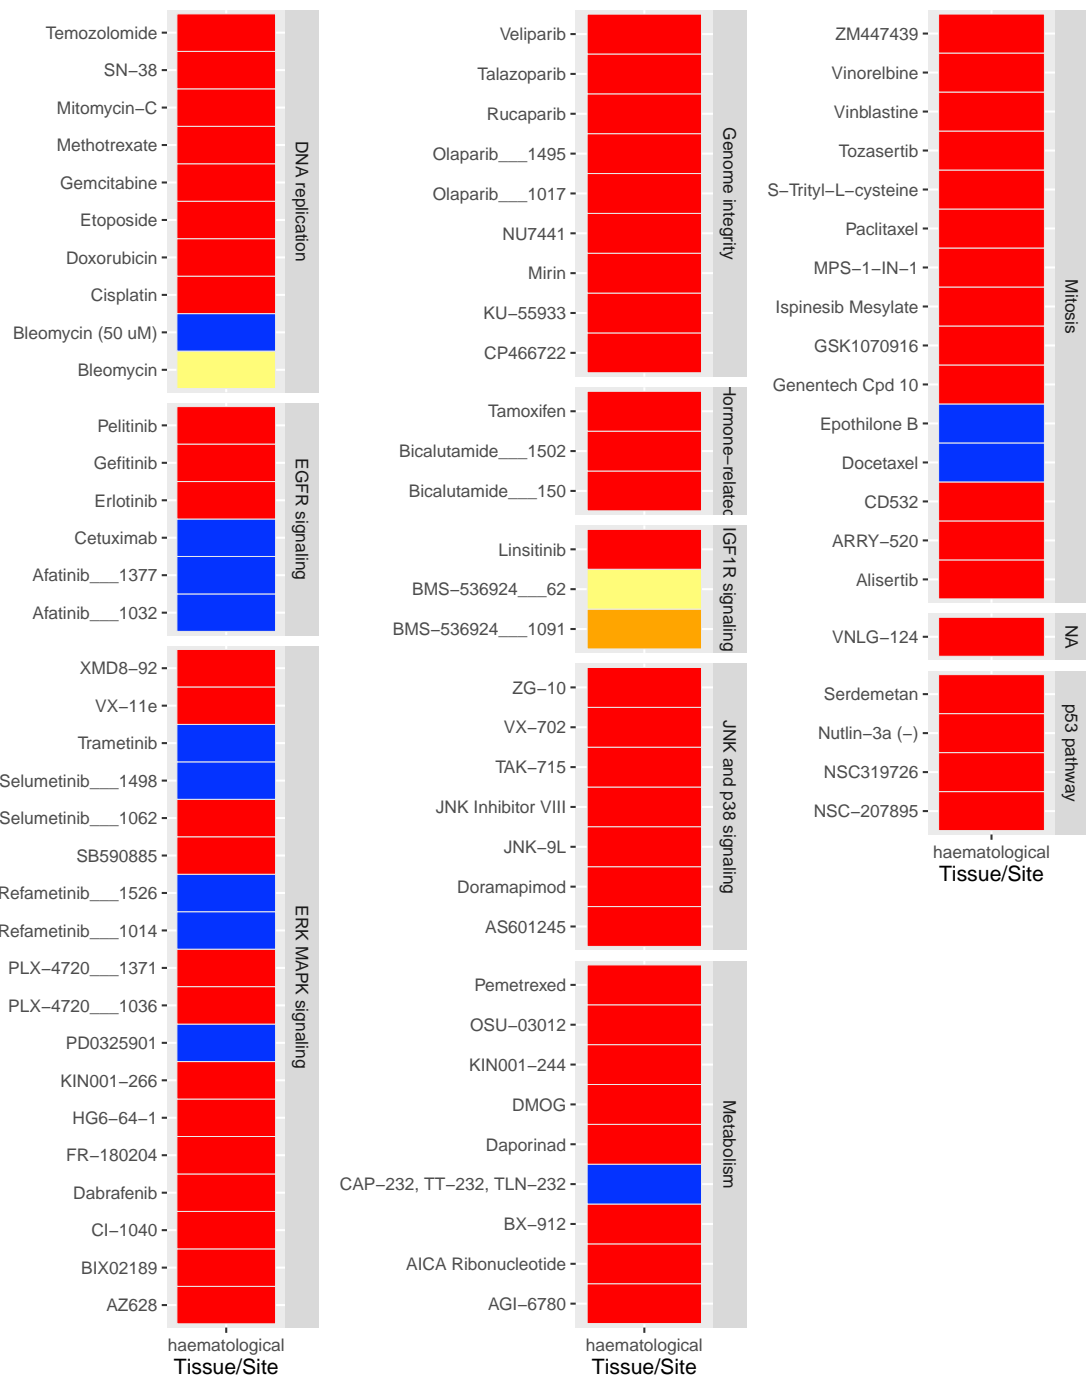

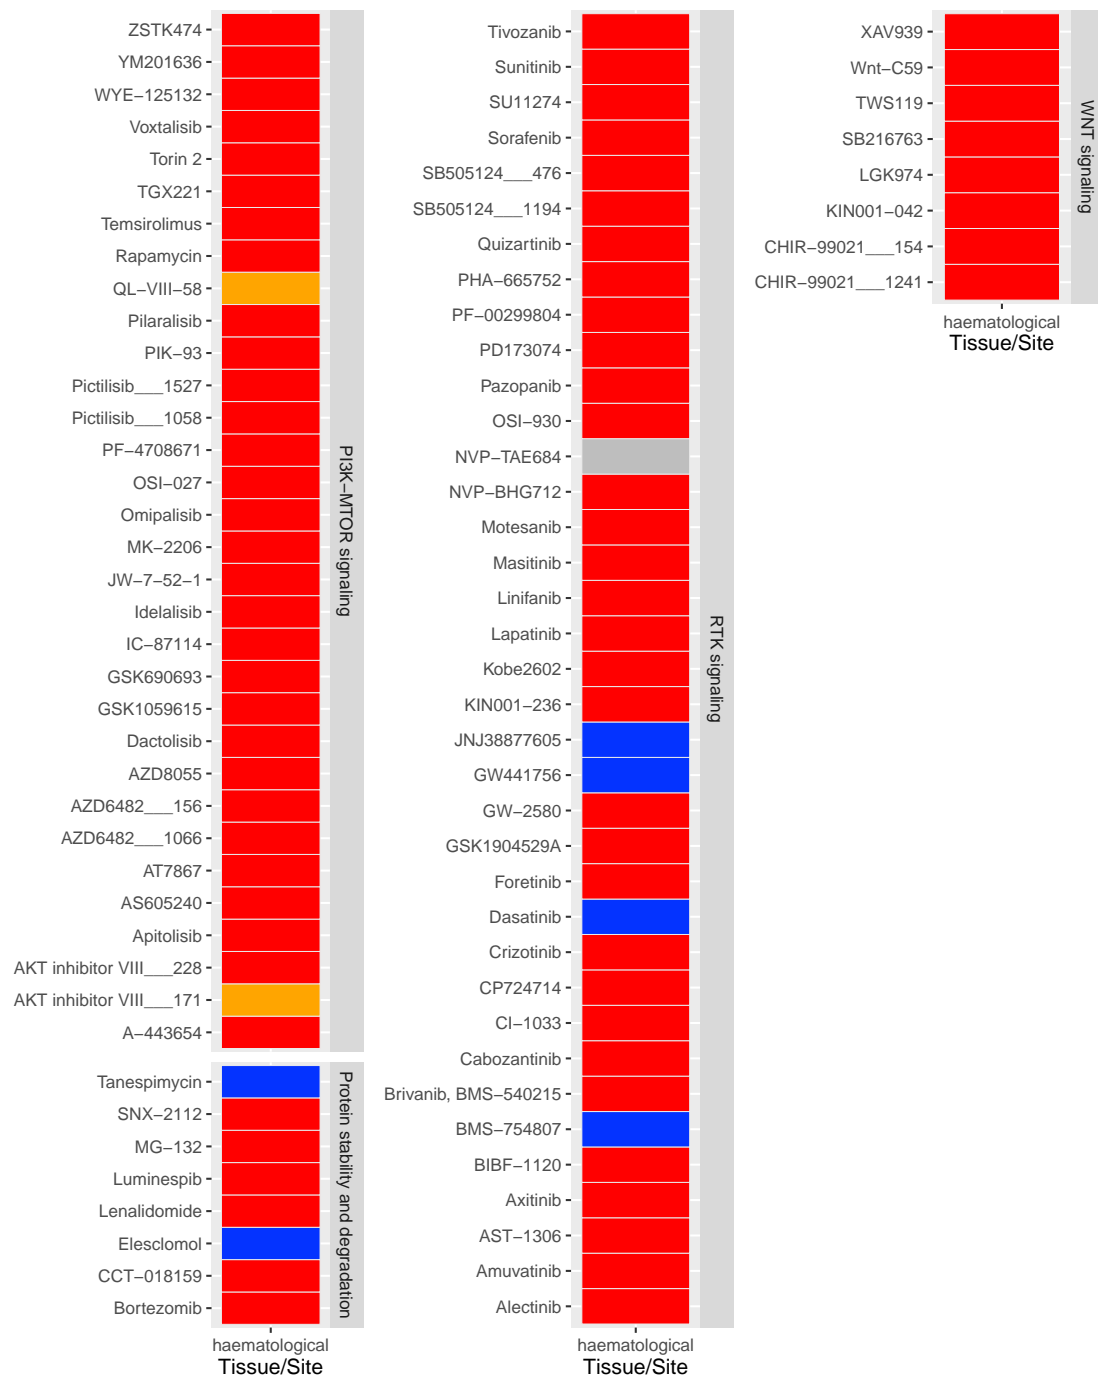

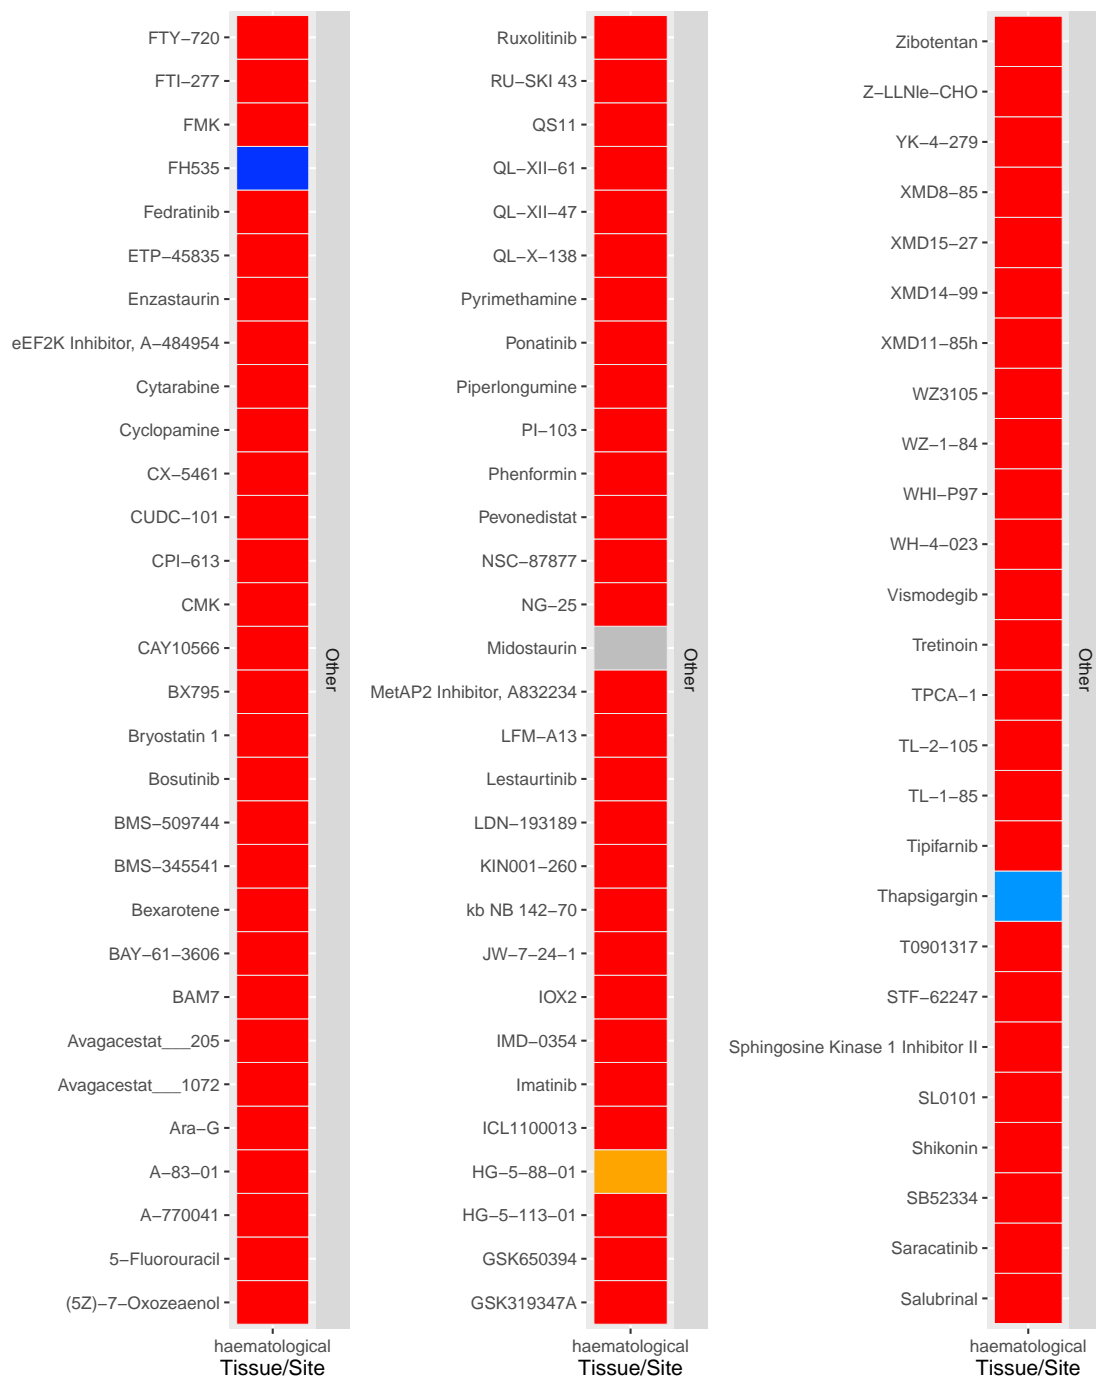

Figure 43: This figure depicts enrichment results for all drugs in the GDSC1 data set using the haematological cancer cell lines as category and the increasingly sorted logarithmized IC50 lists as ranked lists. It can be clearly seen that the haematological tissue is enriched for almost all drugs indicating that haematological cancer cell lines react more sensitive to drug treatment.

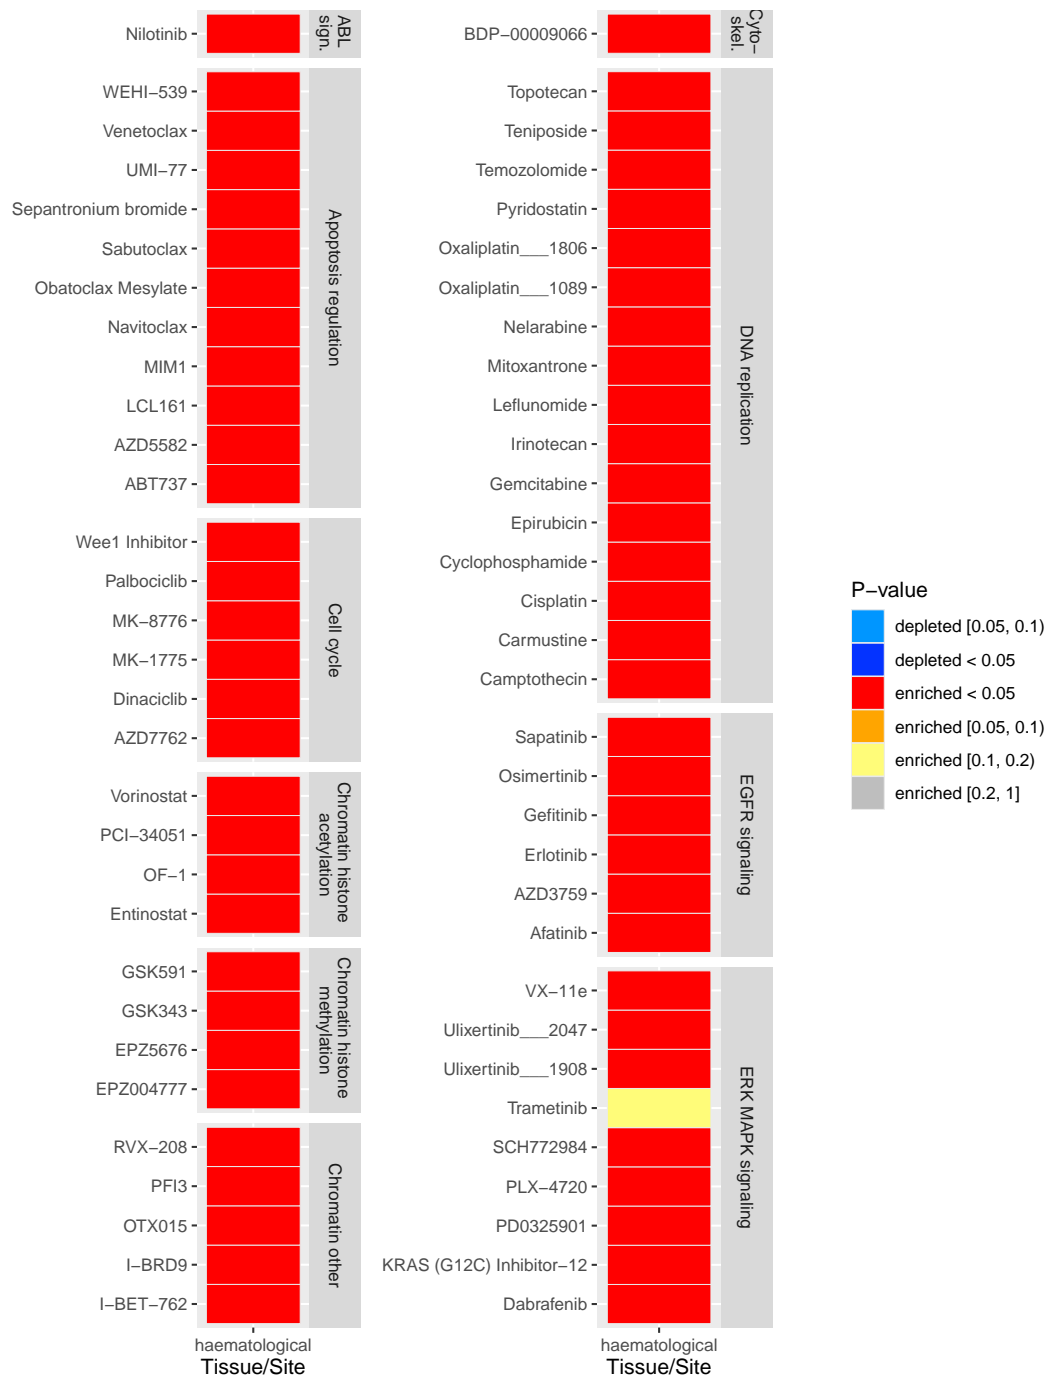

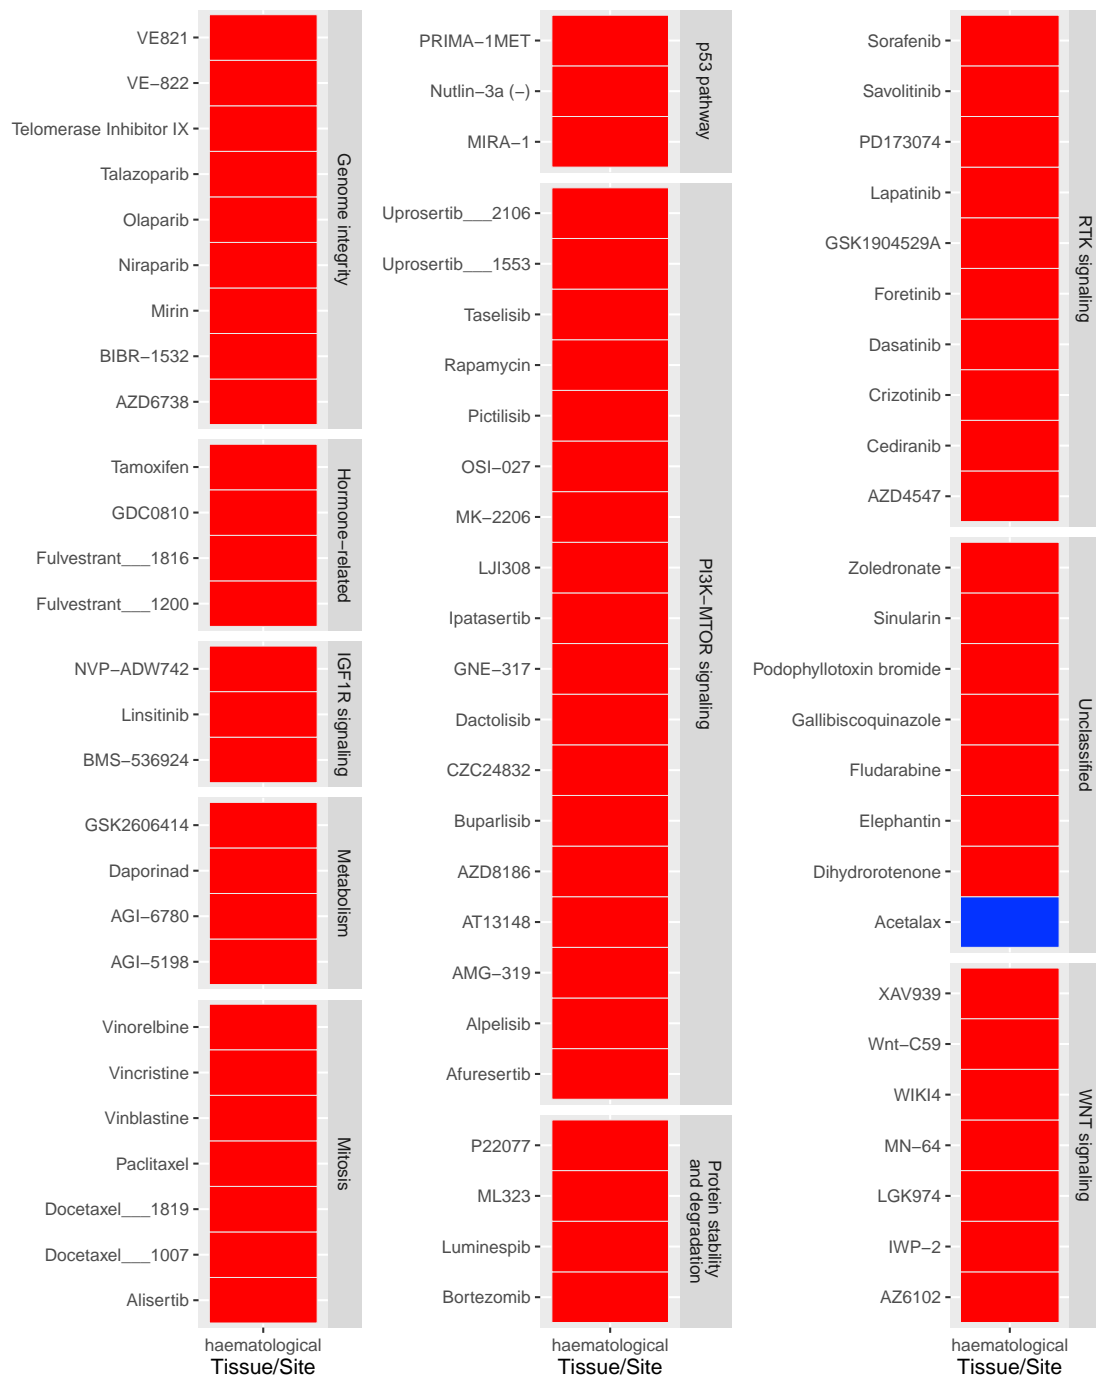

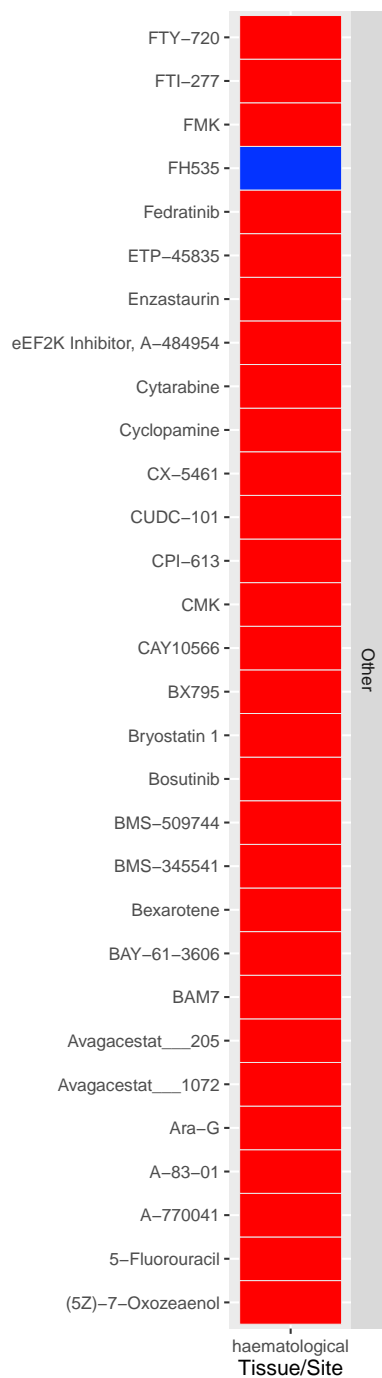

Figure 44: This figure depicts enrichment results for all drugs in the GDSC2 data set using the haematological cancer cell lines as category and the increasingly sorted logarithmized IC50 lists as ranked lists. It can be clearly seen that the haematological tissue is enriched for almost all drugs indicating that haematological cancer cell lines react more sensitive to drug treatment.

## References

- Iorio, F., Knijnenburg, T., Vis, D. et al. (2016) A landscape of pharmacogenomic interactions in cancer. *Cell*, **166**, 740-754. <https://doi.org/10.1016/j.cell.2016.06.017>
- Knijnenburg, T., Klau, G., Iorio, F. et al. (2016) Logic models to predict continuous outputs based on binary inputs with an application to personalized cancer therapy. *Sci Rep*, **6**, 1-14. <https://doi.org/10.1038/srep36812>
- Gonzalez-Perez, A., Perez-Llamas, C., Deu-Pons, J. et al. (2013) IntOGen-mutations identifies cancer drivers across tumor types. *Nat Methods*, **10**, 1081-1082. <https://doi.org/10.1038/nmeth.2642>
- Hollander, M., Wolfe, D. A., and Chicken, E. (2013) Nonparametric statistical methods. (Vol. 751). John Wiley & Sons.
- Gerstner, N., Kehl, T., Lenhof, K. et al. (2020) GeneTrail 3: advanced high-throughput enrichment analysis. *Nucleic Acids Res*, **48** (W1), W515–W520. <https://doi.org/10.1093/nar/gkaa306>
- Hochberg, Y., and Benjamini, Y. (1990) More powerful procedures for multiple significance testing. *Stat Med*, **9**(7), 811-818.
- Breiman, L. (2001) Random Forests. *Machine Learning* **45**, 5–32. <https://doi.org/10.1023/A:1010933404324>
- Fix, E., and Hodges, J.L. Jr. (1952) Discriminatory analysis-nonparametric discrimination: Small sample performance. *CALIFORNIA UNIV BERKELEY*
- Kuhn M. (2020) caret: Classification and Regression Training. R package version 6.0-87. <https://CRAN.R-project.org/package=caret>
- Liaw, A. and Wiener M.. (2002) Classification and Regression by randomForest *R News* **2**(3), 18-22.
